# Supplementary material for: Analogues of N,1-diphenyl-4,5-dihydro-1H-[1]benzothiepino[5,4-c]pyrazole-3-carboxamide and N,1-diphenyl-4,5-dihydro-1H-[1]benzothiepino[5,4-c]pyrazole-3-carboxamide-6,6-dioxide: syntheses, characterization, antimicrobial, antituberculosis, and antitumor activity
Source: Royal Society of Chemistry journal article supplement (doi:10.1039/c3ra23124k), 2013-01-01
Supplement: c3ra23124k.pdf [file c3ra23124k.pdf]

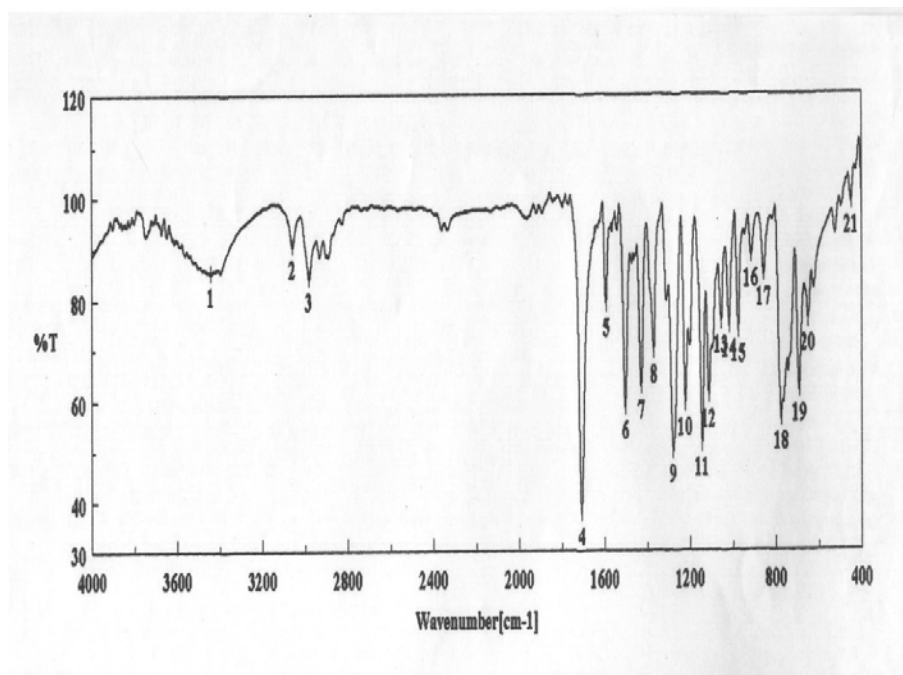

IR spectrum of ethyl 1-phenyl-4,5-dihydro-1*H*-[1]benzothiepine[5,4-*c*]pyrazole-3-carboxylate (7)

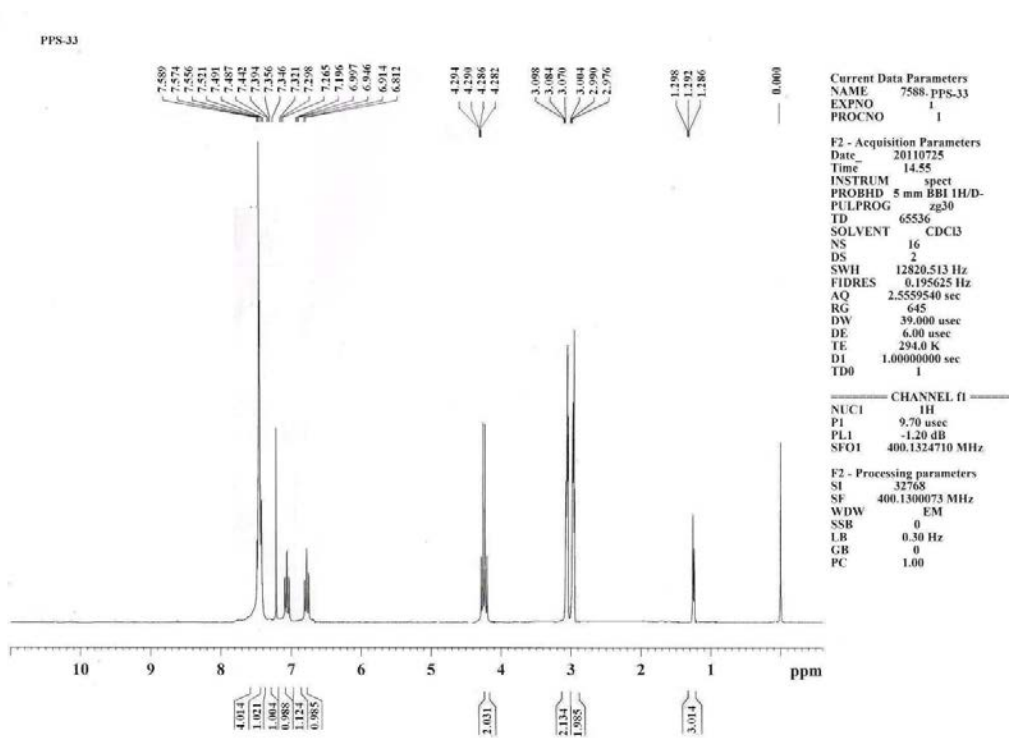

<sup>1</sup>H-NMR spectrum of ethyl 1-phenyl-4,5-dihydro-1*H*-[1]benzothiepine[5,4-*c*]pyrazole-3-carboxylate (7)

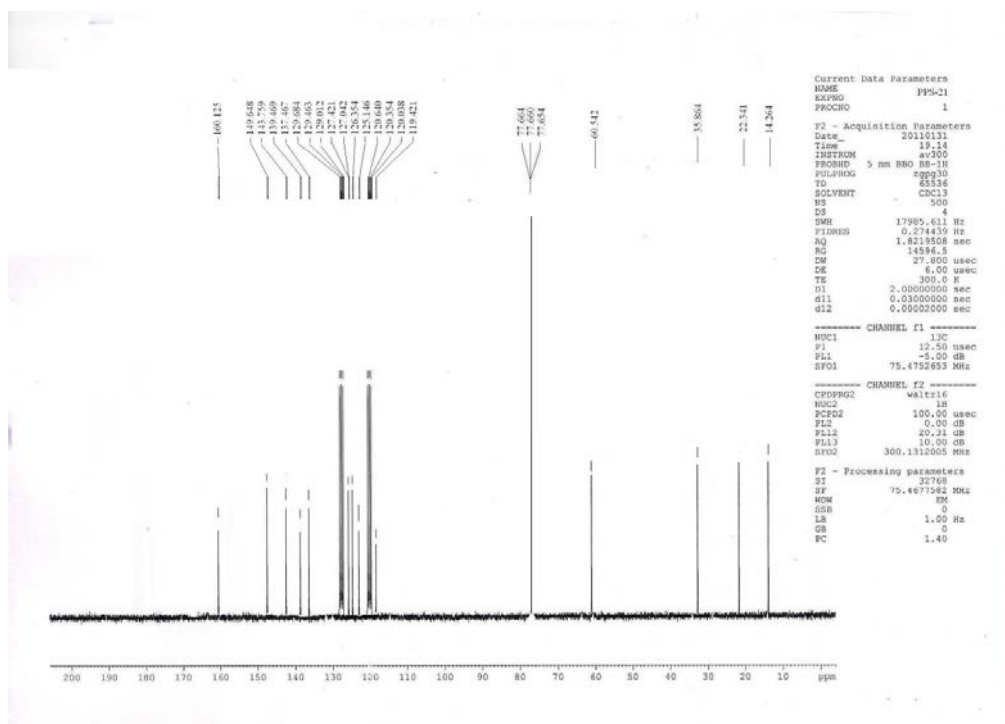

**<sup>13</sup>C-NMR spectrum of ethyl 1-phenyl-4,5-dihydro-1*H*-[1]benzothiepine[5,4-*c*]pyrazole-3-carboxylate (7)**

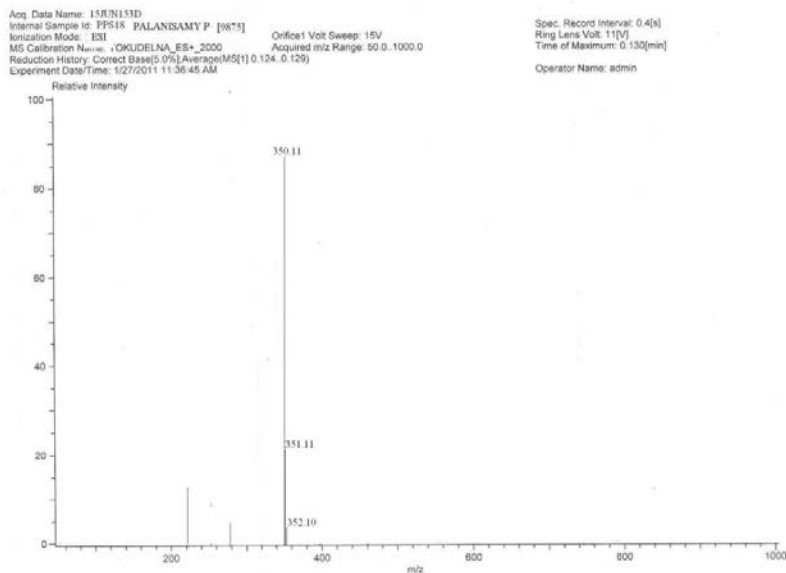

**Mass spectrum of ethyl 1-phenyl-4,5-dihydro-1*H*-[1]benzothiepine[5,4-*c*]pyrazole-3-carboxylate (7)**

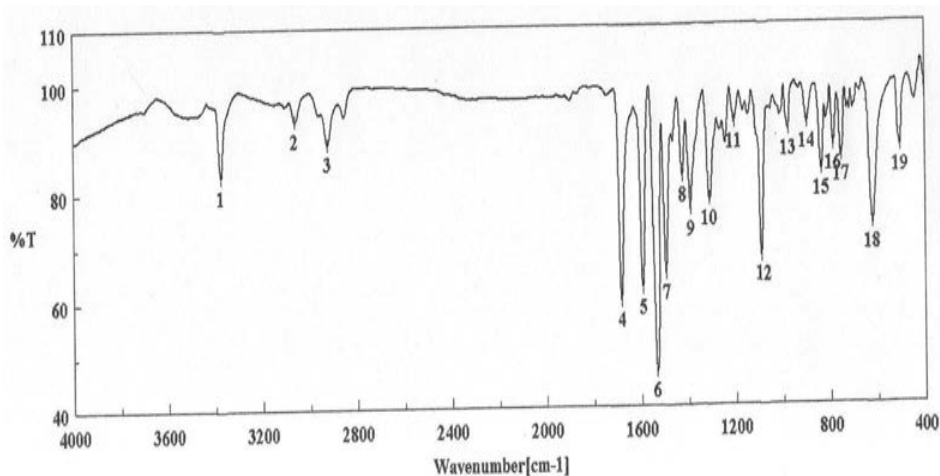

IR spectrum of 1-(6,6-dioxido-1-phenyl-4,5-dihydro-1H-[1]benzothiepiino[5,4-c]pyrazol-3-yl)butan-1-one (8)

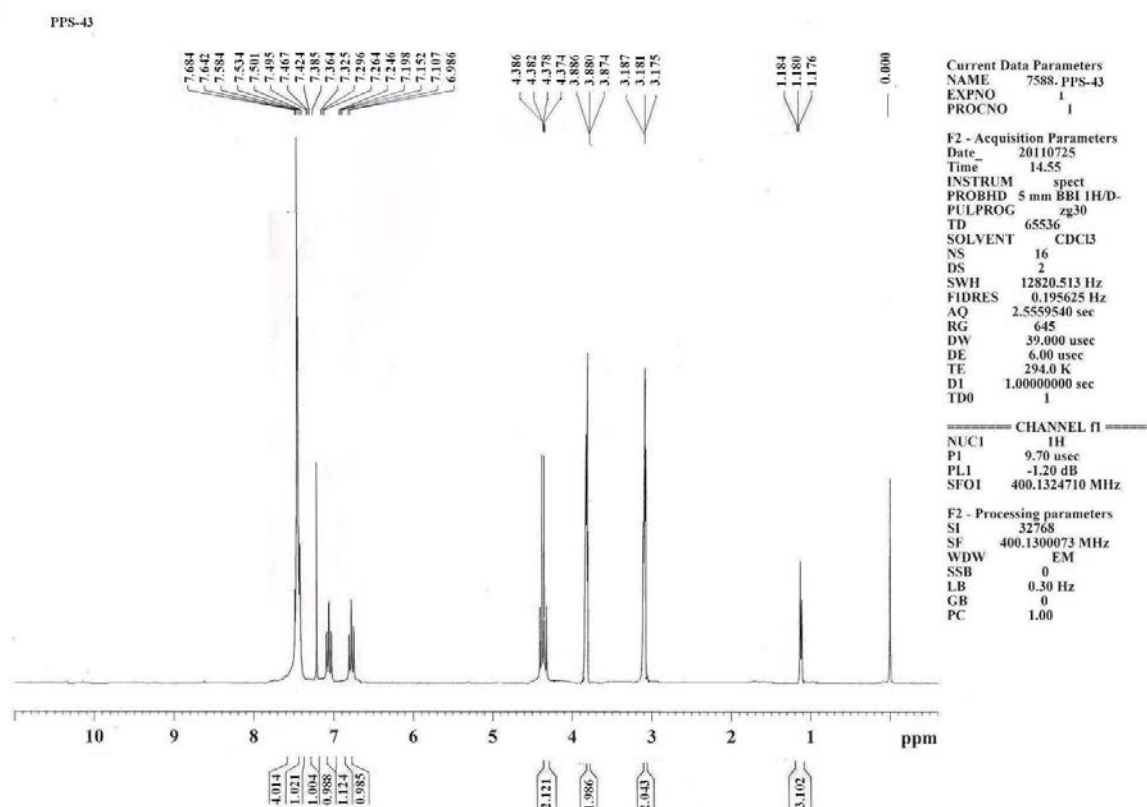

<sup>1</sup>H-NMR spectrum of 1-(6,6-dioxido-1-phenyl-4,5-dihydro-1H-[1]benzothiepiino[5,4-c]pyrazol-3-yl)butan-1-one (8)

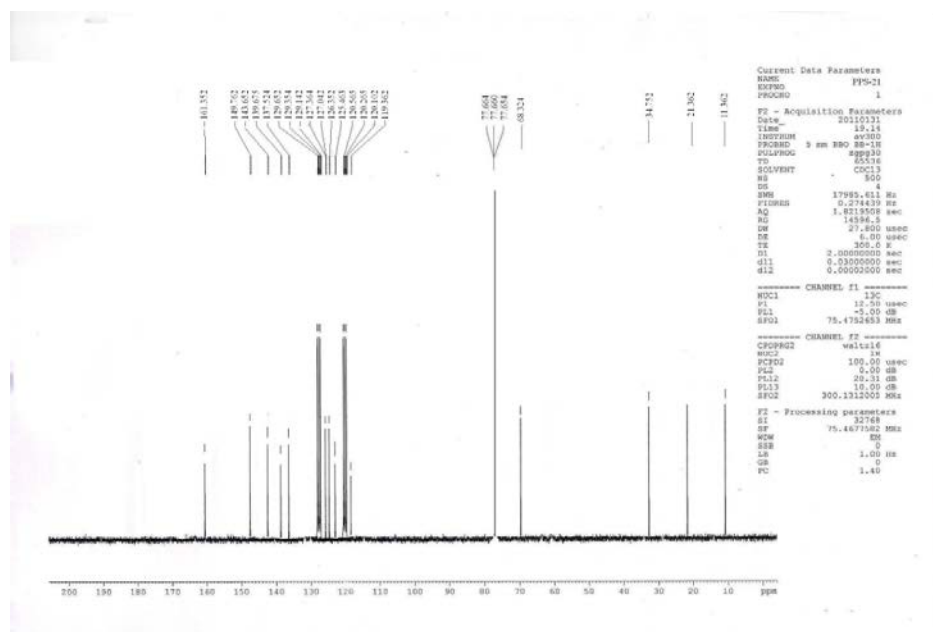

**<sup>13</sup>C-NMR spectrum of 1-(6,6-dioxido-1-phenyl-4,5-dihydro-1H-[1]benzothiepine[5,4-c]pyrazol-3-yl)butan-1-one (8)**

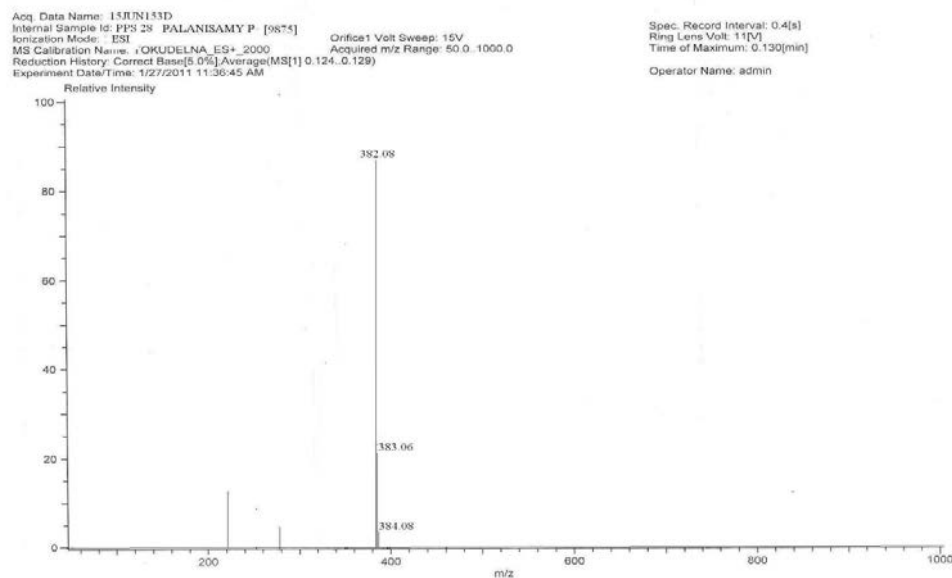

**Mass spectrum of 1-(6,6-dioxido-1-phenyl-4,5-dihydro-1H-[1]benzothiepine[5,4-c]pyrazol-3-yl)butan-1-one (8)**

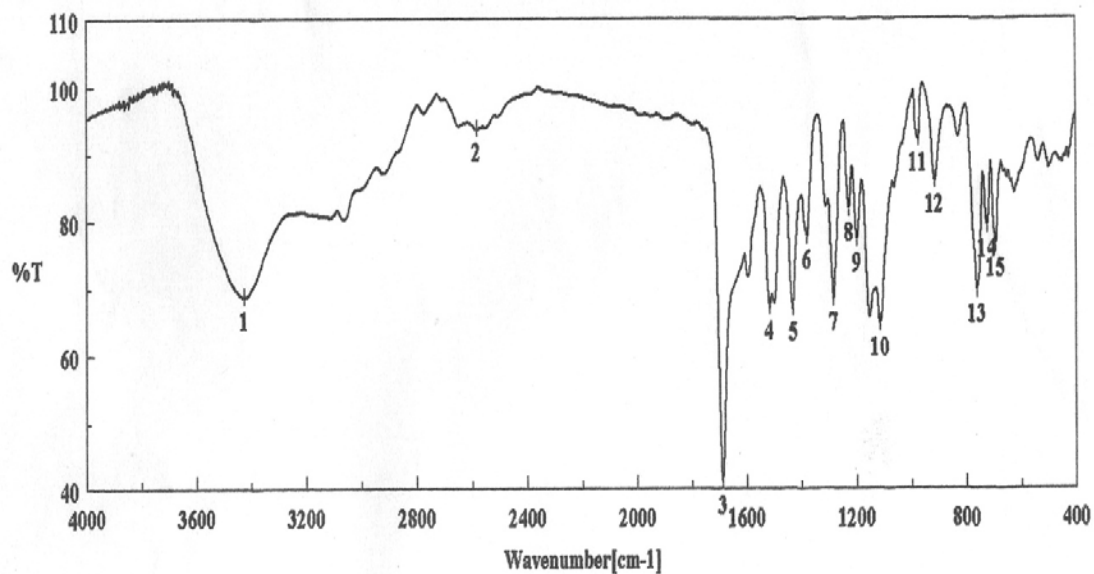

IR spectrum of 1-phenyl-4,5-dihydro-1*H*-[1]benzothiepine[5,4-*c*]pyrazole-3-carboxylic acid (9)

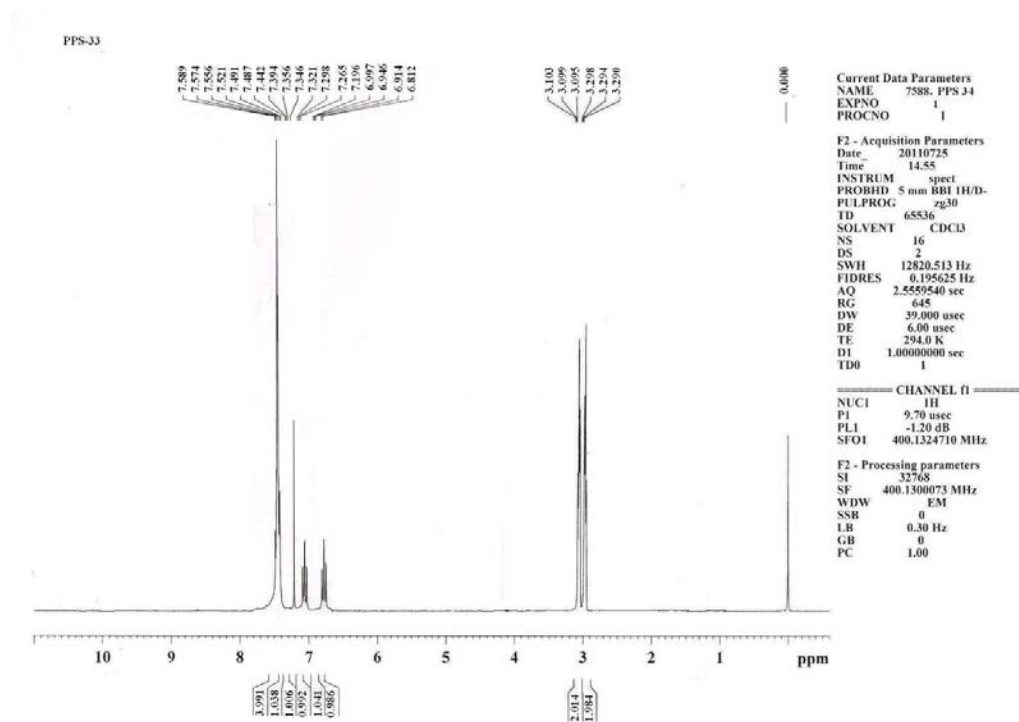

<sup>1</sup>H-NMR spectrum of 1-phenyl-4,5-dihydro-1*H*-[1]benzothiepine[5,4-*c*]pyrazole-3-carboxylic acid (9)

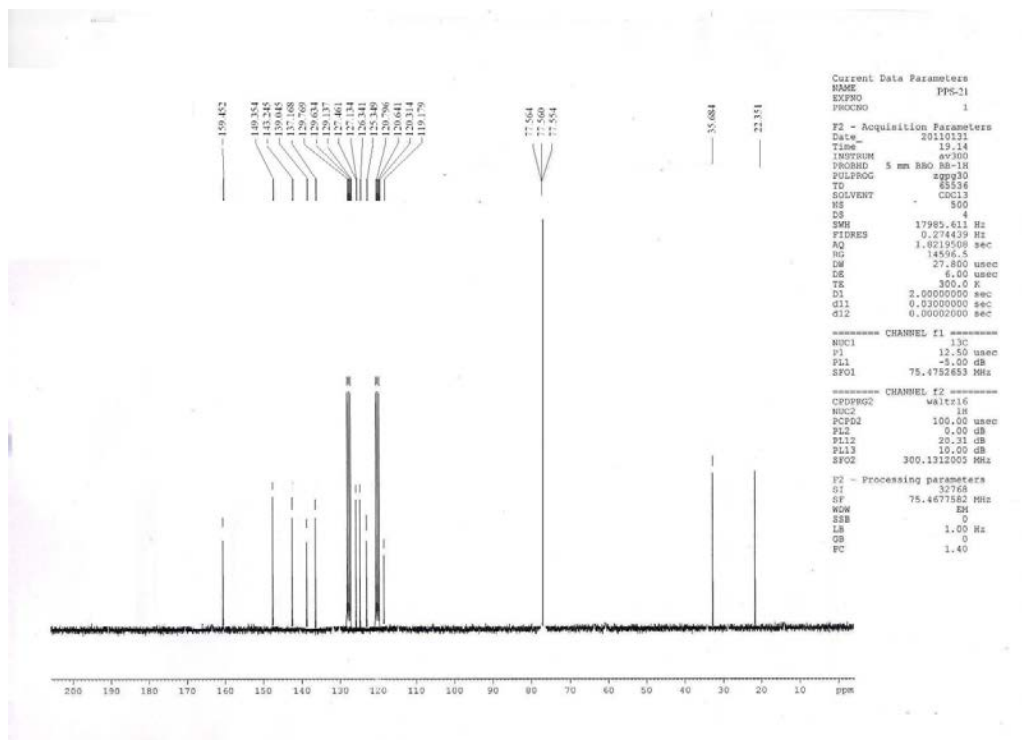

**<sup>13</sup>C-NMR spectrum of 1-phenyl-4,5-dihydro-1*H*-[1]benzothiepine[5,4-*c*]pyrazole-3-carboxylic acid (9)**

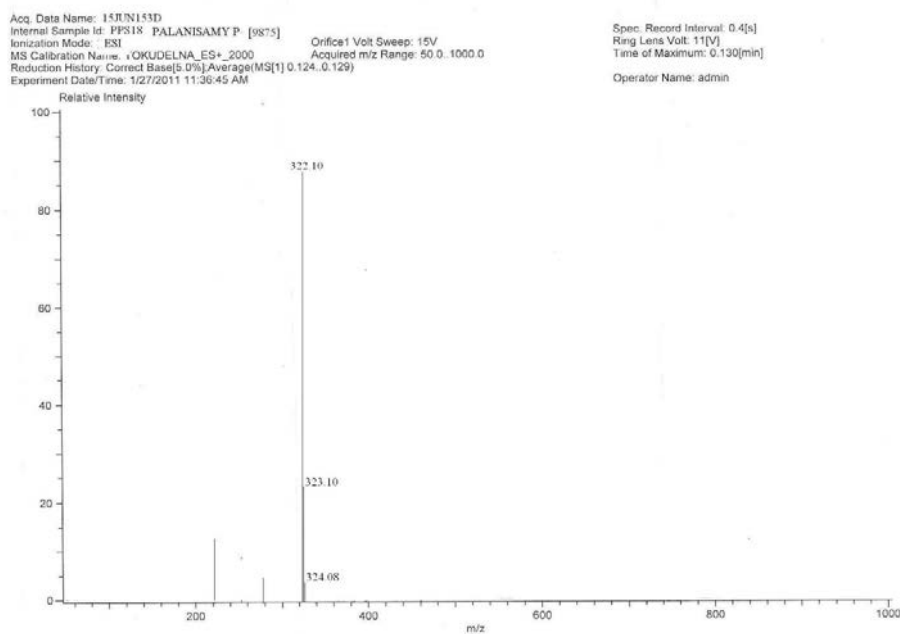

**Mass spectrum of 1-phenyl-4,5-dihydro-1*H*-[1]benzothiepine[5,4-*c*]pyrazole-3-carboxylic acid (9)**

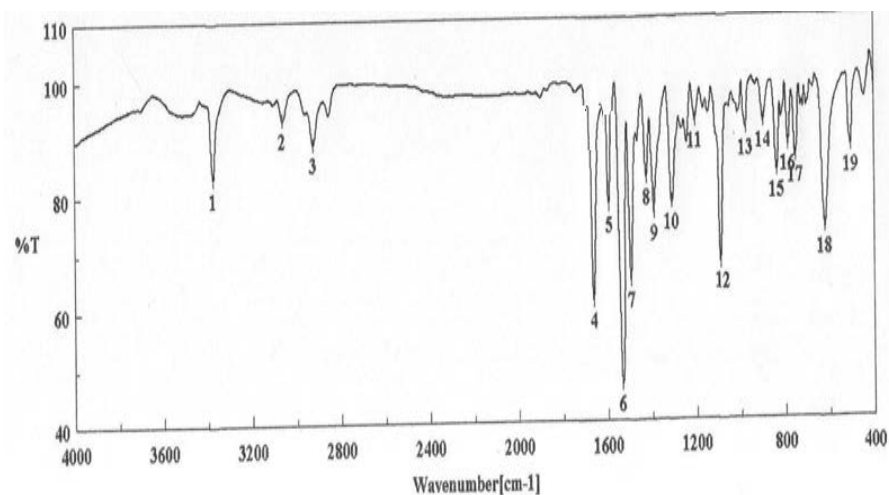

**IR spectrum of 1-phenyl-4,5-dihydro-1H-[1]benzothiepine[5,4-c]pyrazole-3-carboxylic acid 6,6-dioxide (10)**

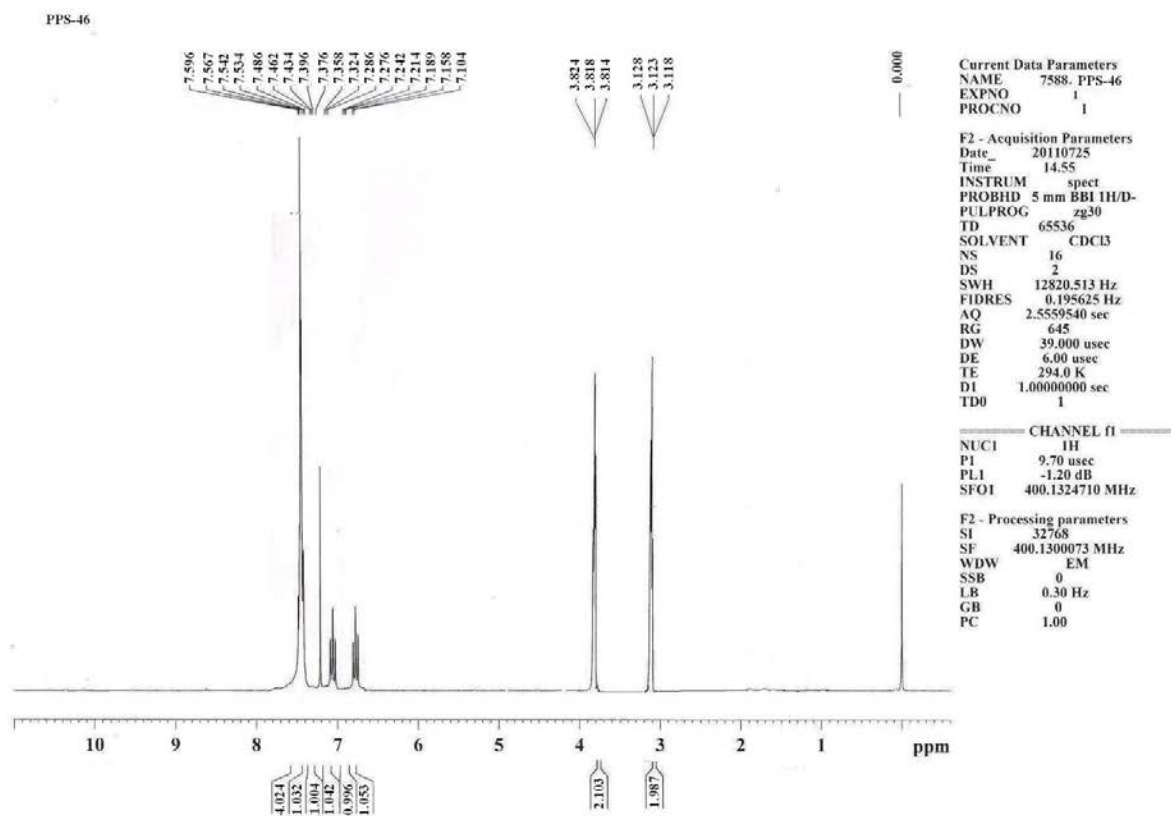

**<sup>1</sup>H-NMR spectrum of 1-phenyl-4,5-dihydro-1H-[1]benzothiepine[5,4-c]pyrazole-3-carboxylic acid 6,6-dioxide (10)**

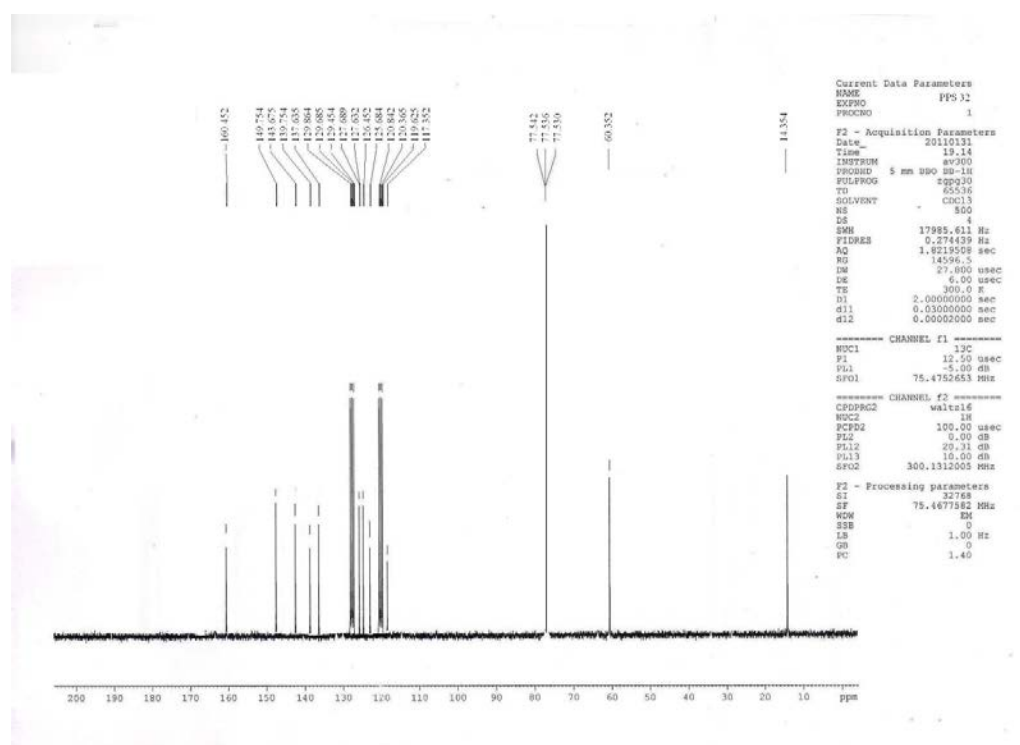

**$^{13}\text{C}$ -NMR spectrum of 1-phenyl-4,5-dihydro-1H-[1]benzothiepine[5,4-c]pyrazole-3-carboxylic acid 6,6-dioxide (10)**

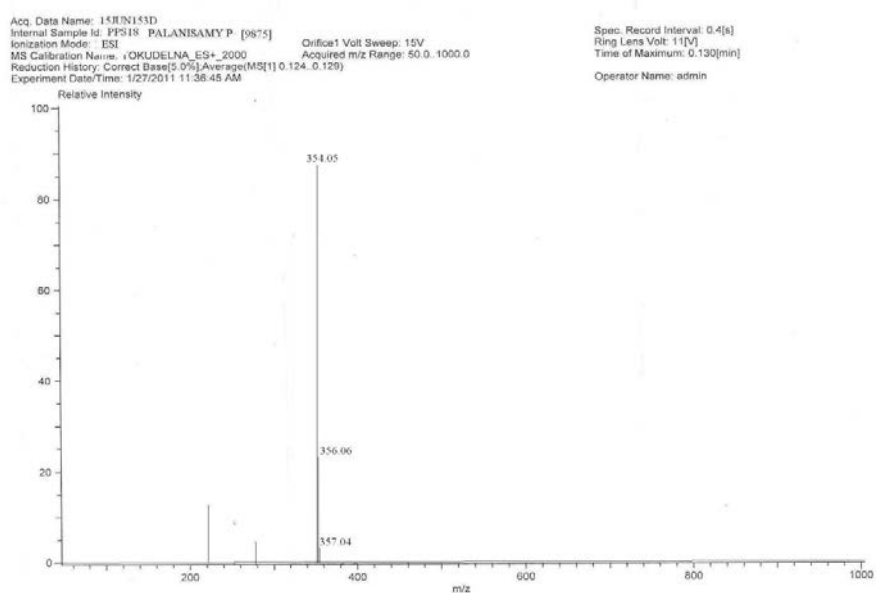

**Mass spectrum of 1-phenyl-4,5-dihydro-1H-[1]benzothiepine[5,4-c]pyrazole-3-carboxylic acid 6,6-dioxide (10)**



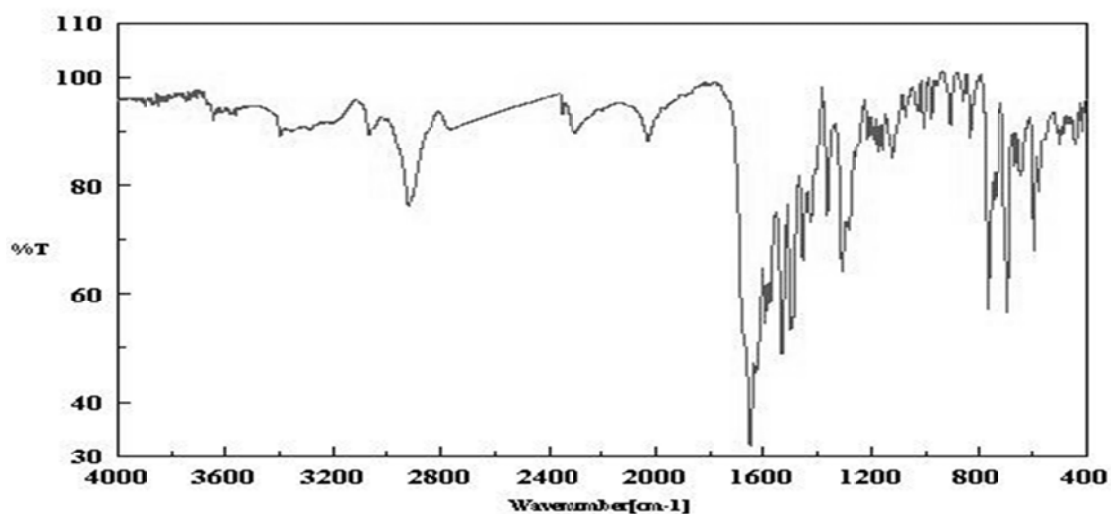

IR spectrum of *N*,1-diphenyl-4,5-dihydro-1*H*-[1]benzothiepine[5,4-*c*]pyrazole-3-carboxamide (11a)

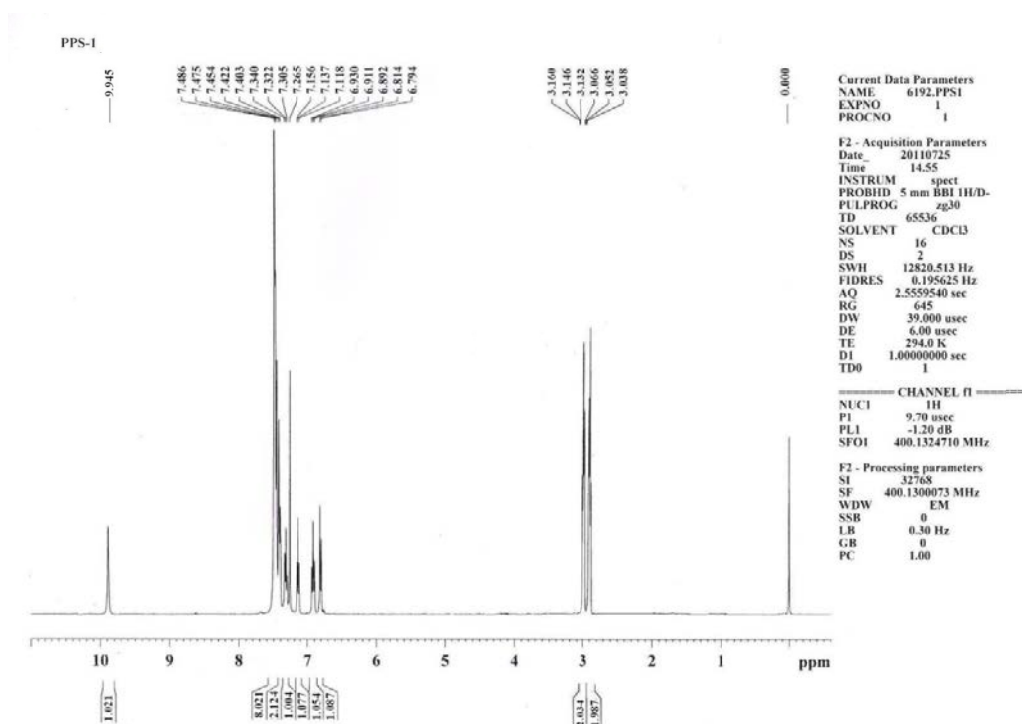

<sup>1</sup>H-NMR spectrum of *N*,1-diphenyl-4,5-dihydro-1*H*-[1]benzothiepine[5,4-*c*]pyrazole-3-carboxamide (11a)

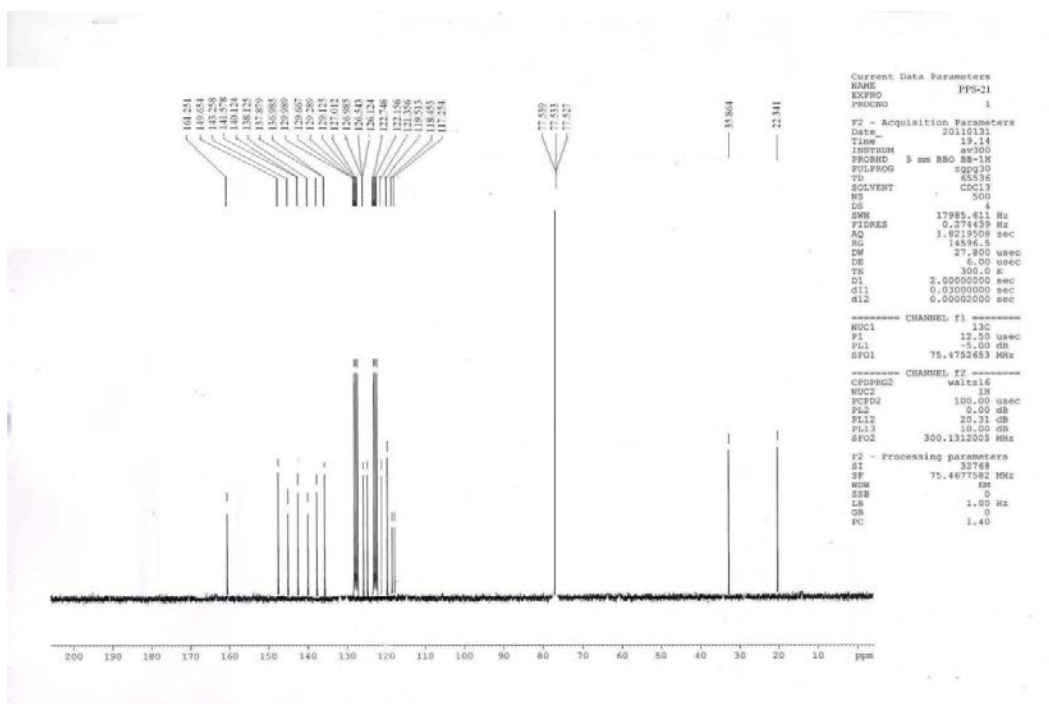

**$^{13}\text{C}$ -NMR spectrum of *N*,1-diphenyl-4,5-dihydro-1*H*-[1]benzothiepine[5,4-*c*]pyrazole-3-carboxamide (11a)**

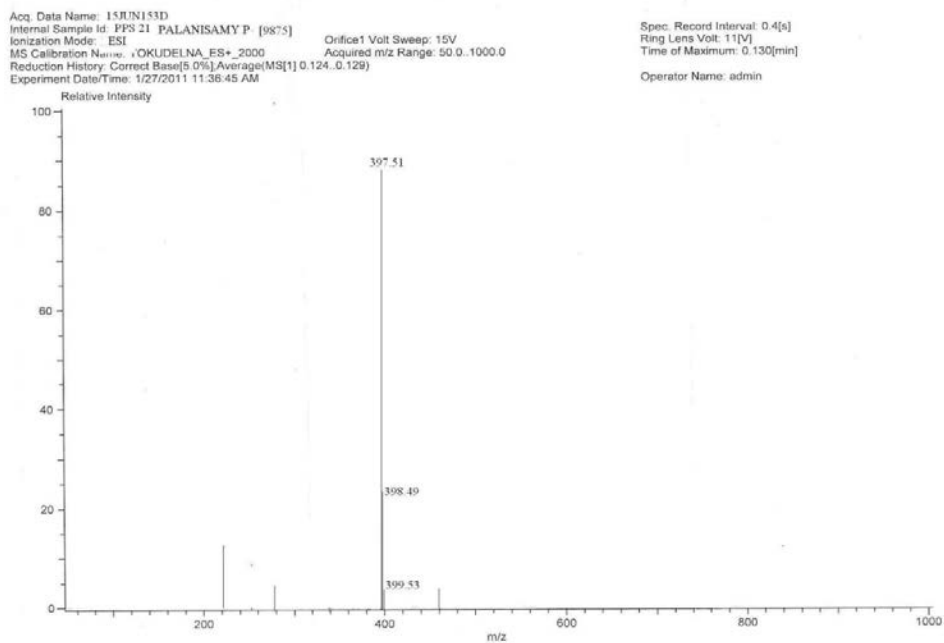

**Mass spectrum of *N*,1-diphenyl-4,5-dihydro-1*H*-[1]benzothiepine[5,4-*c*]pyrazole-3-carboxamide (11a)**

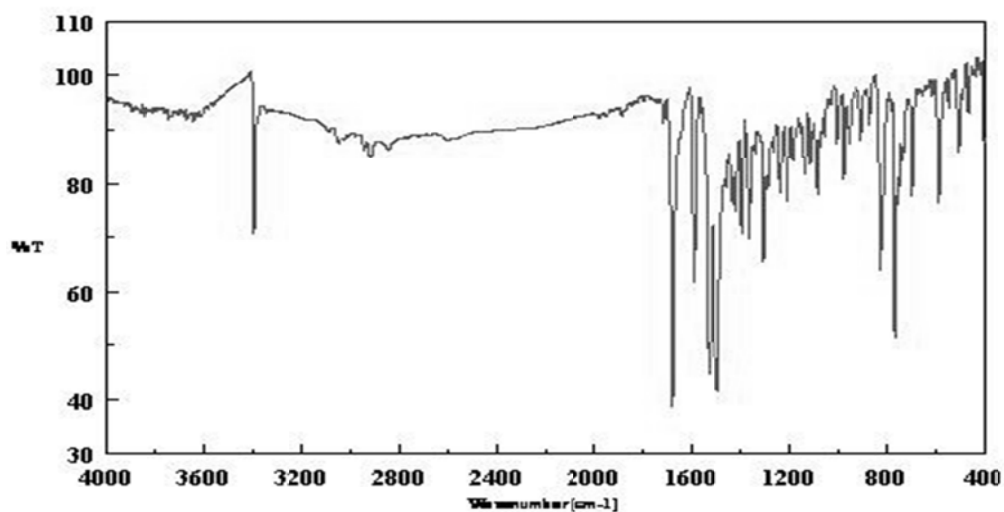

IR spectrum of *N*-(3-chlorophenyl)-1-phenyl-4,5-dihydro-1*H*-[1]benzothiepiino[5,4-*c*]pyrazole-3-carboxamide (11b)

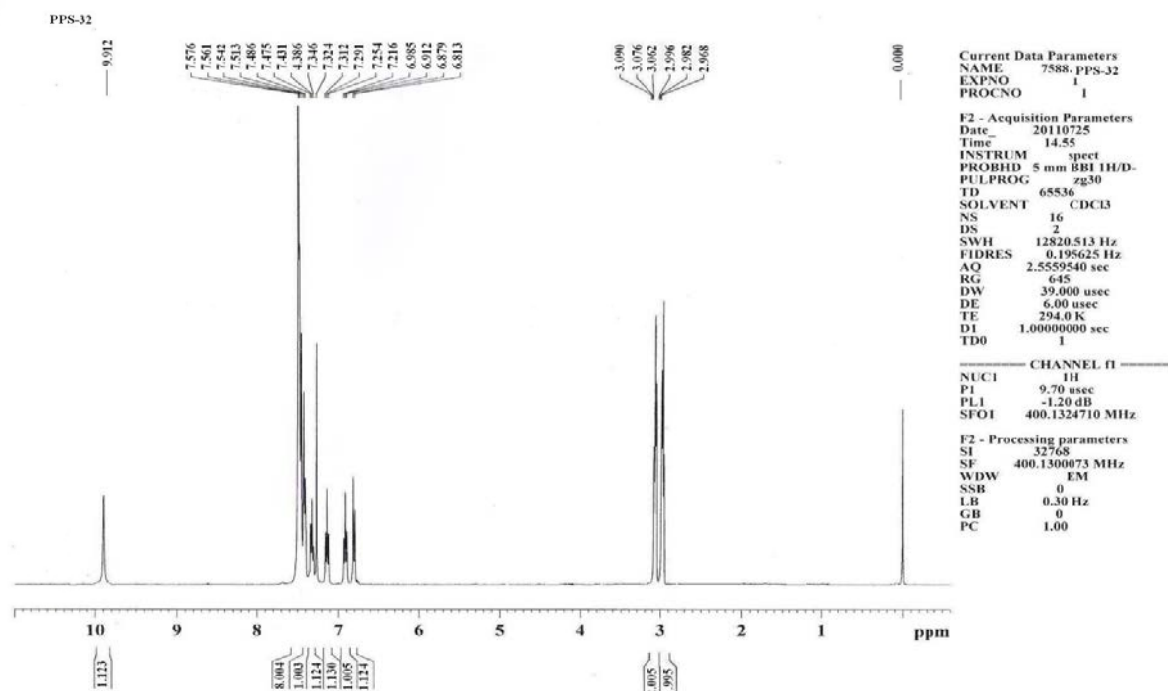

<sup>1</sup>H-NMR spectrum of *N*-(3-chlorophenyl)-1-phenyl-4,5-dihydro-1*H*-[1]benzothiepiino[5,4-*c*]pyrazole-3-carboxamide (11b)

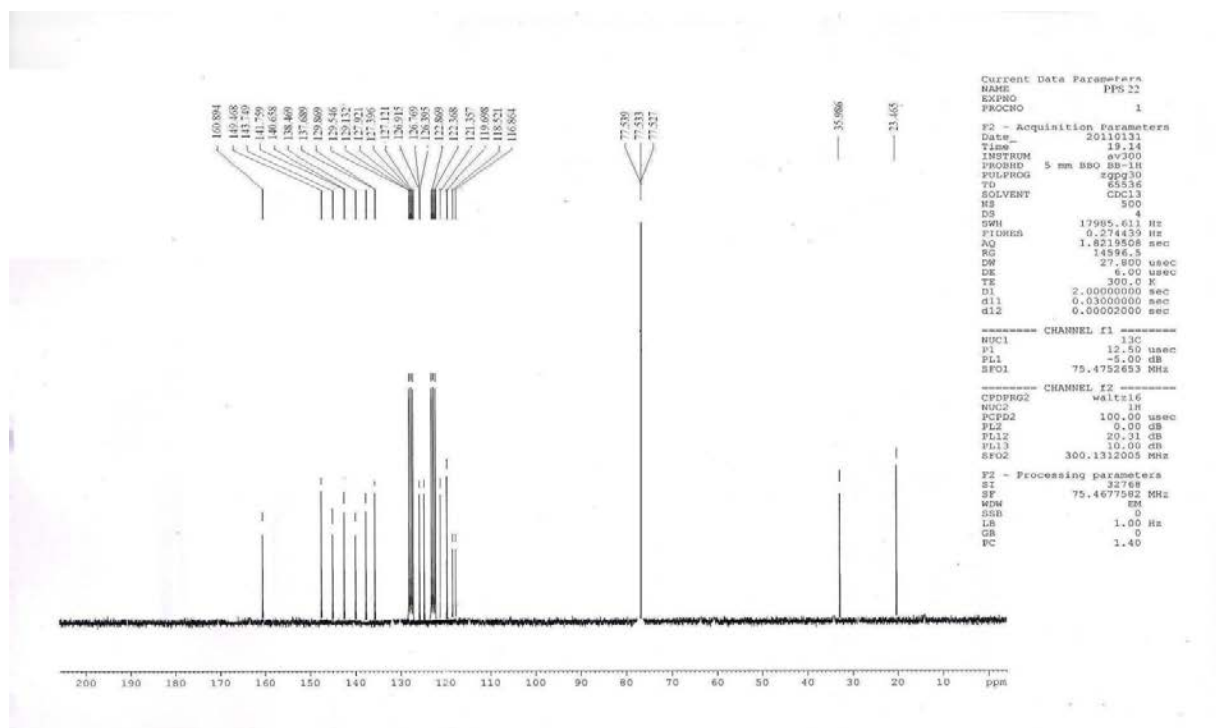

**<sup>13</sup>C-NMR *N*-(3-chlorophenyl)-1-phenyl-4,5-dihydro-1*H*-[1]benzothiepine[5,4-*c*]pyrazole-3-carboxamide (11b)**

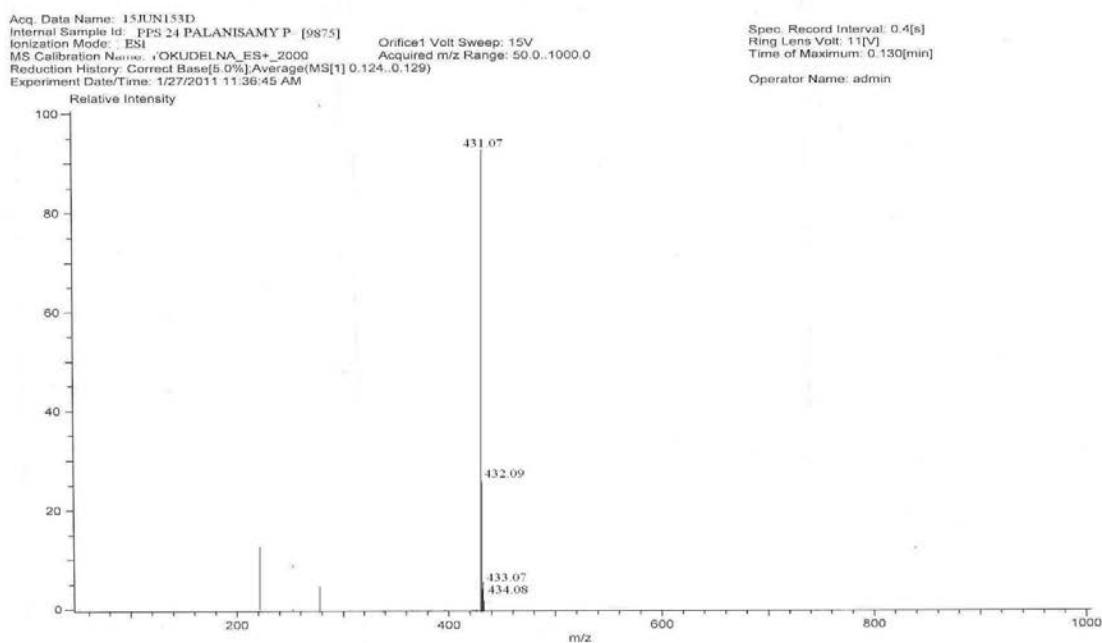

**Mass spectrum of *N*-(3-chlorophenyl)-1-phenyl-4,5-dihydro-1*H*-[1]benzothiepine[5,4-*c*]pyrazole-3-carboxamide (11b)**

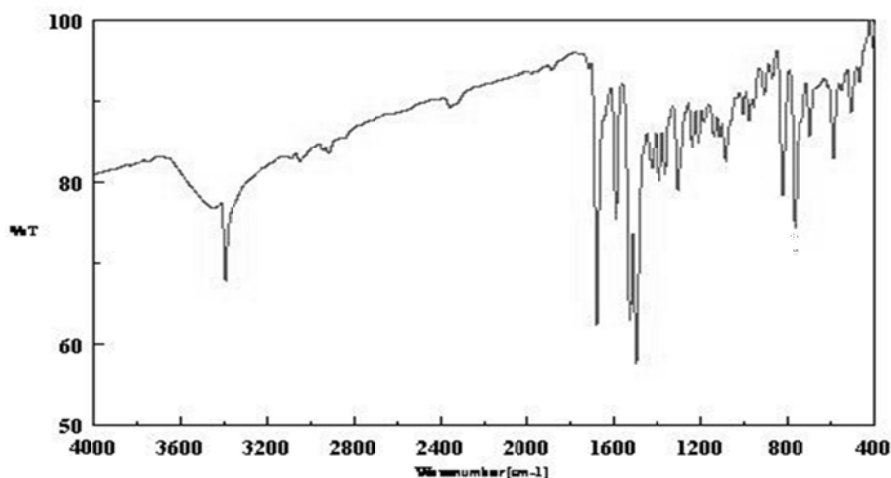

IR spectrum of *N*-(4-chlorophenyl)-1-phenyl-4,5-dihydro-1*H*-[1]benzothiepine[5,4-*c*]pyrazole-3-carboxamide (11c)

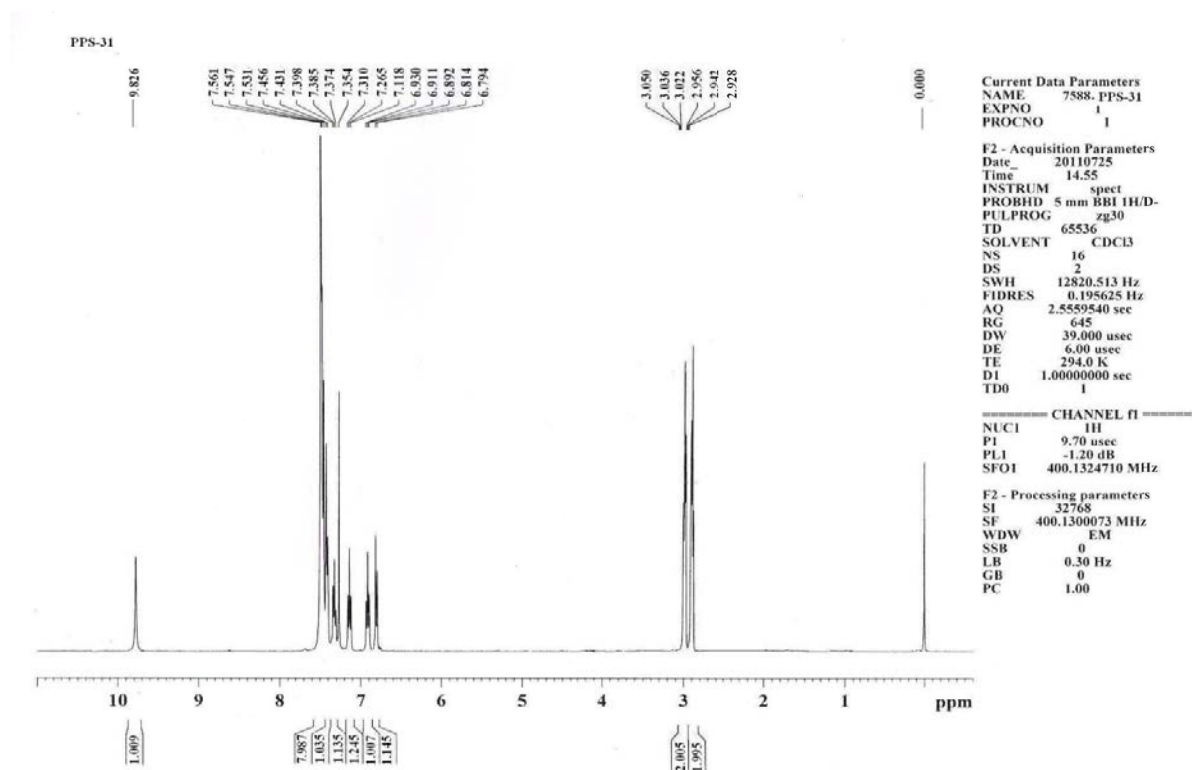

<sup>1</sup>H-NMR spectrum of *N*-(4-chlorophenyl)-1-phenyl-4,5-dihydro-1*H*-[1]benzothiepine[5,4-*c*]pyrazole-3-carboxamide (11c)

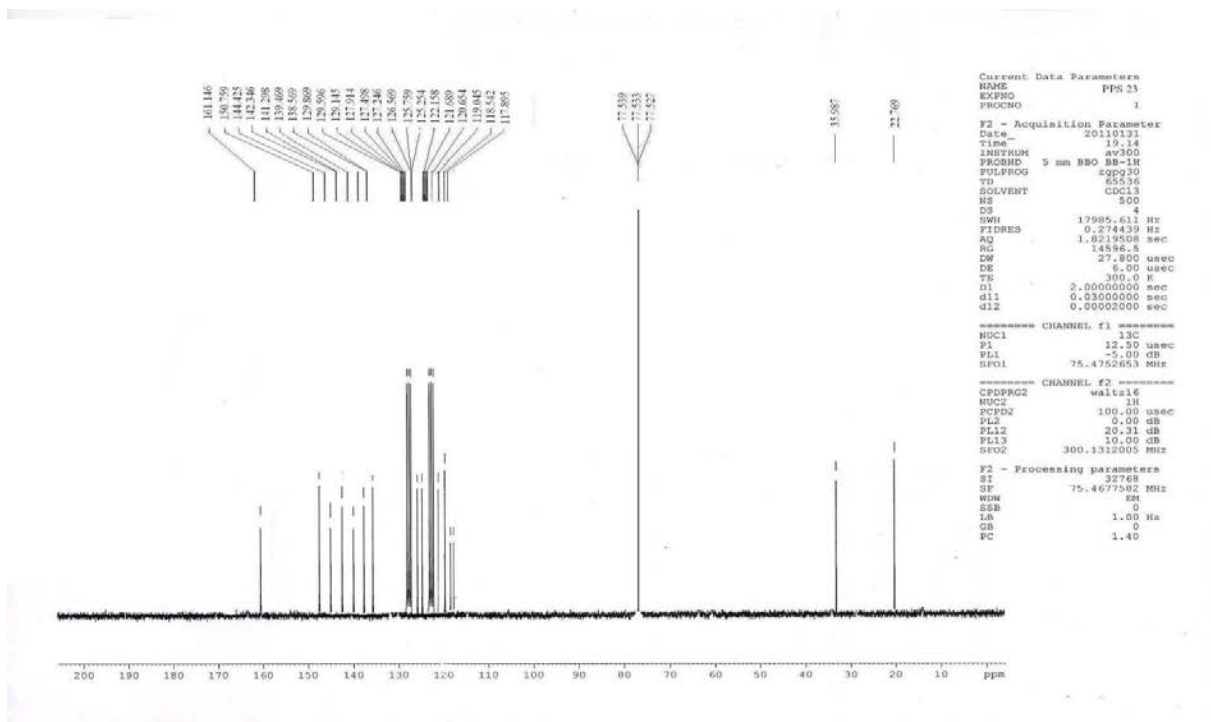

**<sup>13</sup>C-NMR spectrum of *N*-(4-chlorophenyl)-1-phenyl-4,5-dihydro-1*H*-[1]benzothiepine[5,4-*c*]pyrazole-3-carboxamide (11c)**

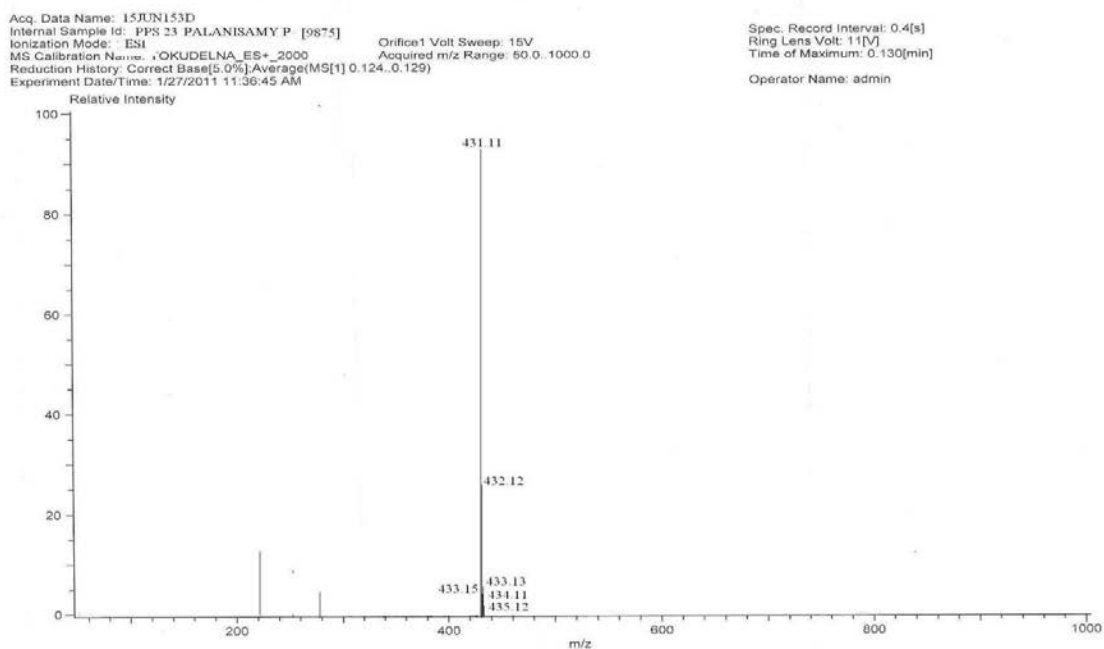

**Mass spectrum of *N*-(4-chlorophenyl)-1-phenyl-4,5-dihydro-1*H*-[1]benzothiepine[5,4-*c*]pyrazole-3-carboxamide (11c)**

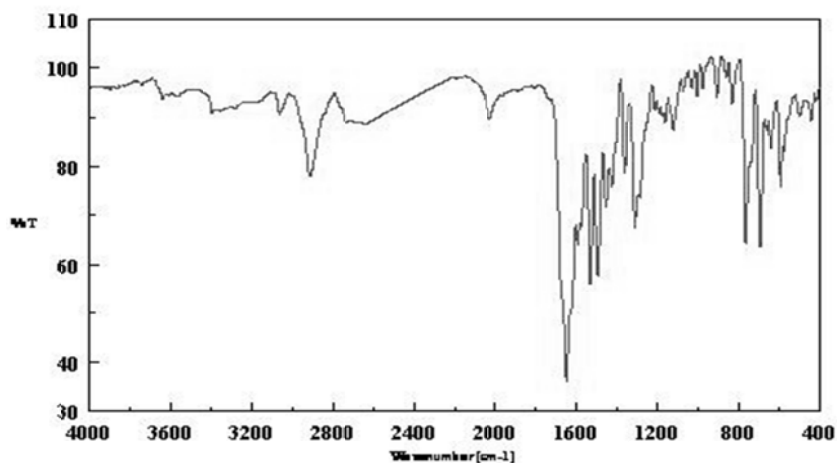

IR spectrum of *N*-(3-nitrophenyl)-1-phenyl-4,5-dihydro-1*H*-[1]benzothiepine[5,4-*c*]pyrazole-3-carboxamide (11d)

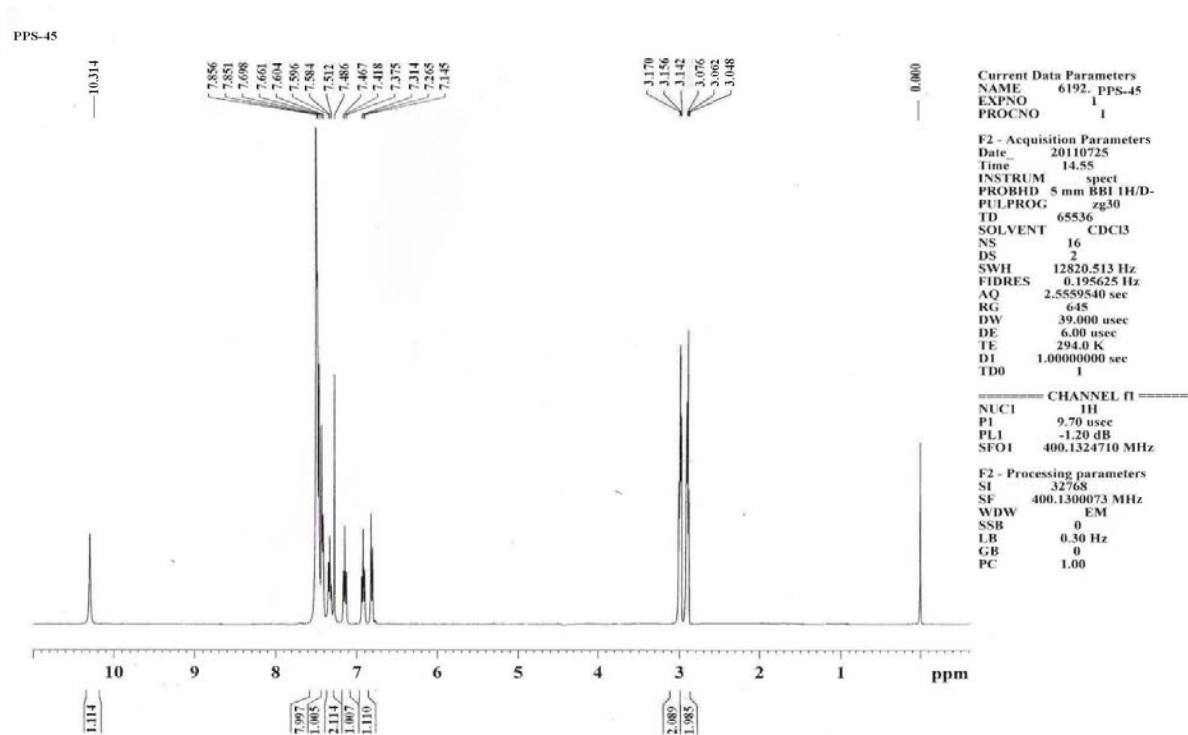

<sup>1</sup>H-NMR spectrum of *N*-(3-nitrophenyl)-1-phenyl-4,5-dihydro-1*H*-[1]benzothiepine[5,4-*c*]pyrazole-3-carboxamide (11d)

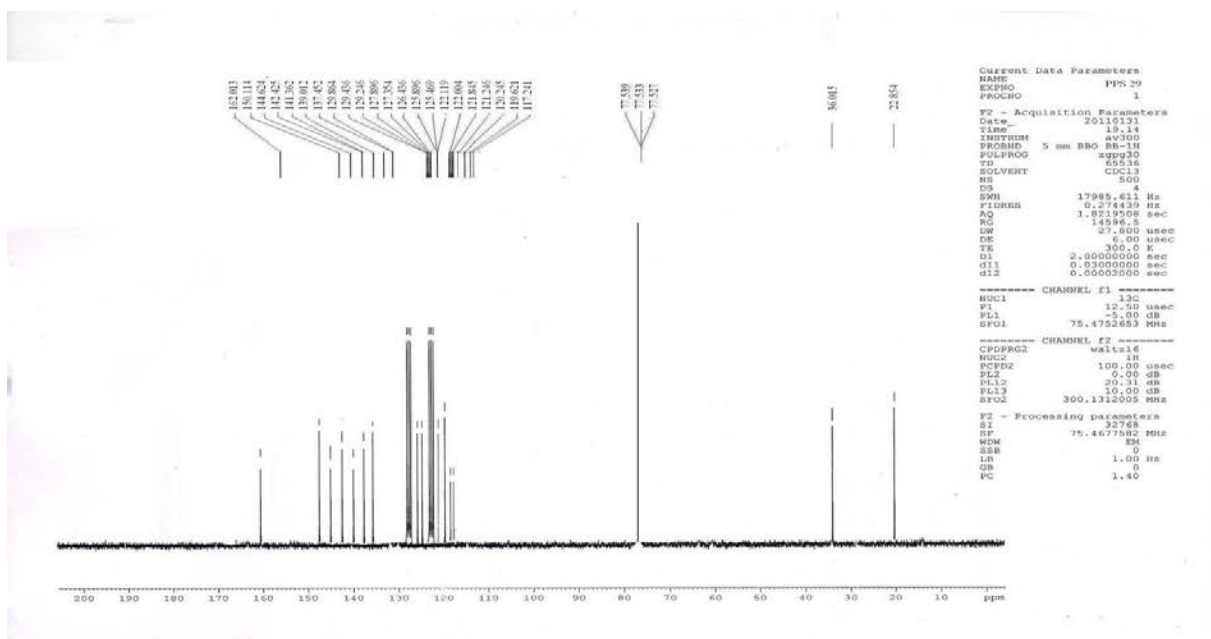

**<sup>13</sup>C-NMR spectrum of *N*-(3-nitrophenyl)-1-phenyl-4,5-dihydro-1*H*-[1]benzothiepine[5,4-*c*]pyrazole-3-carboxamide (11d)**

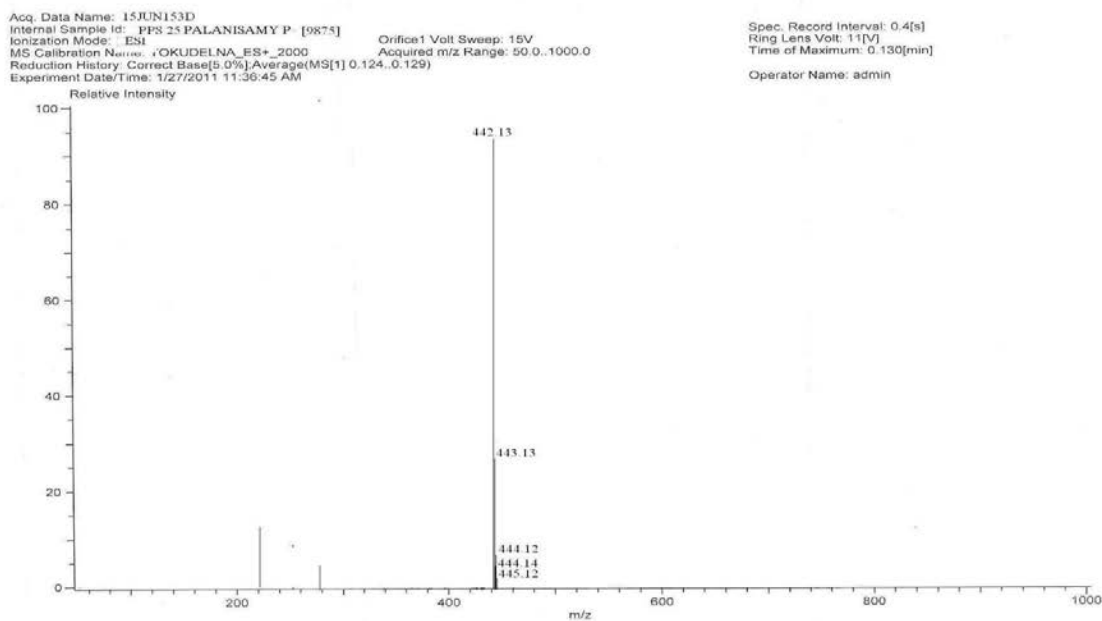

**Mass spectrum of *N*-(3-nitrophenyl)-1-phenyl-4,5-dihydro-1*H*-[1]benzothiepine[5,4-*c*]pyrazole-3-carboxamide (11d)**



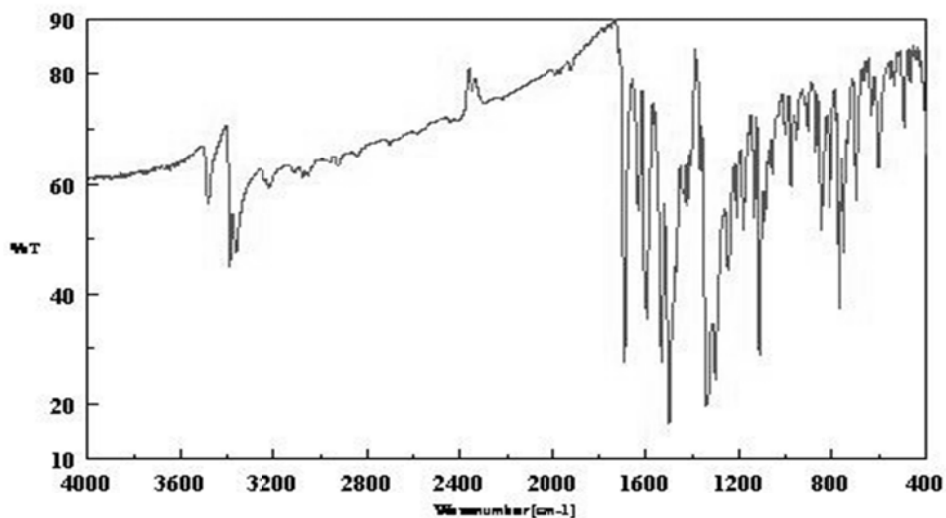

IR spectrum of *N*-(4-nitrophenyl)-1-phenyl-4,5-dihydro-1*H*-[1]benzothiepine[5,4-*c*]pyrazole-3-carboxamide (11e)

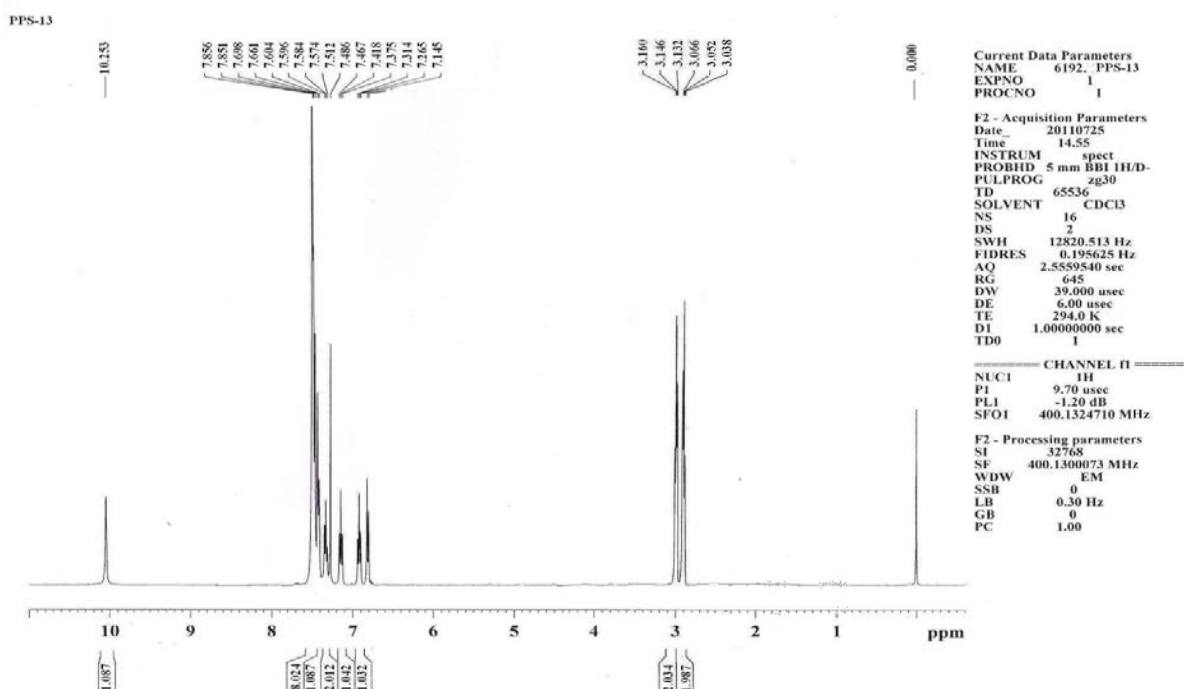

<sup>1</sup>H-NMR spectrum of *N*-(4-nitrophenyl)-1-phenyl-4,5-dihydro-1*H*-[1]benzothiepine[5,4-*c*]pyrazole-3-carboxamide (11e)

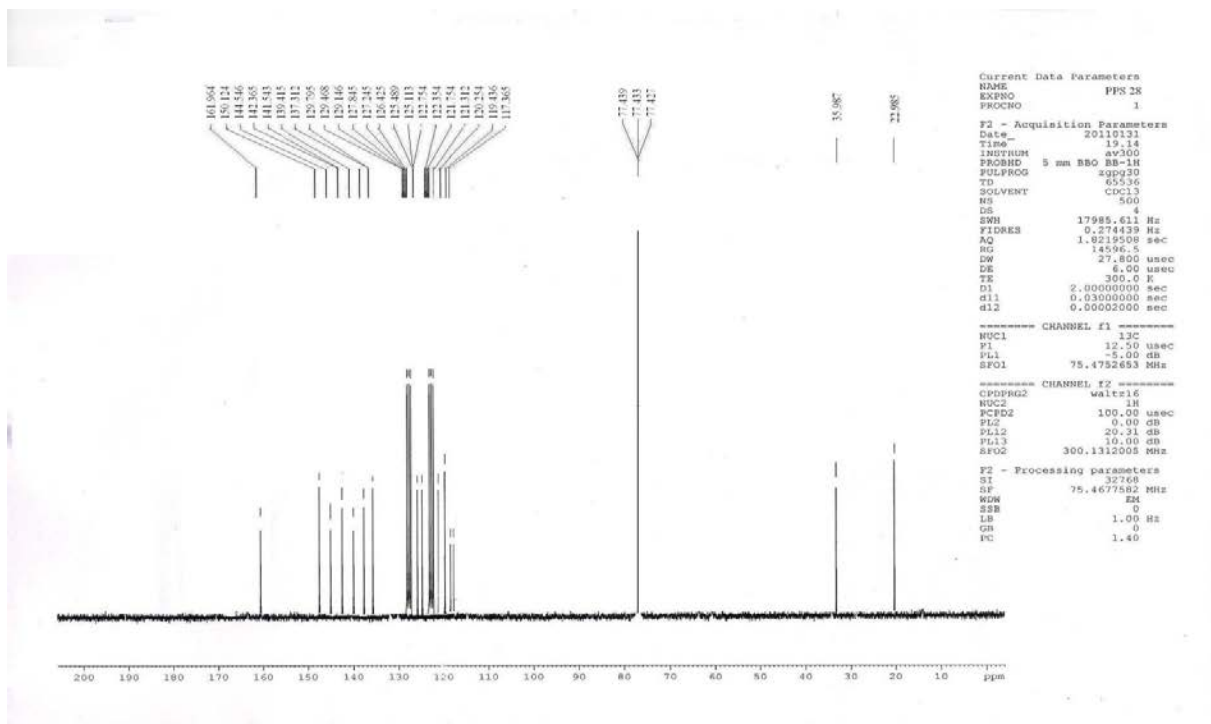

**<sup>13</sup>C-NMR spectrum of *N*-(4-nitrophenyl)-1-phenyl-4,5-dihydro-1*H*-[1]benzothiepine[5,4-*c*]pyrazole-3-carboxamide (11e)**

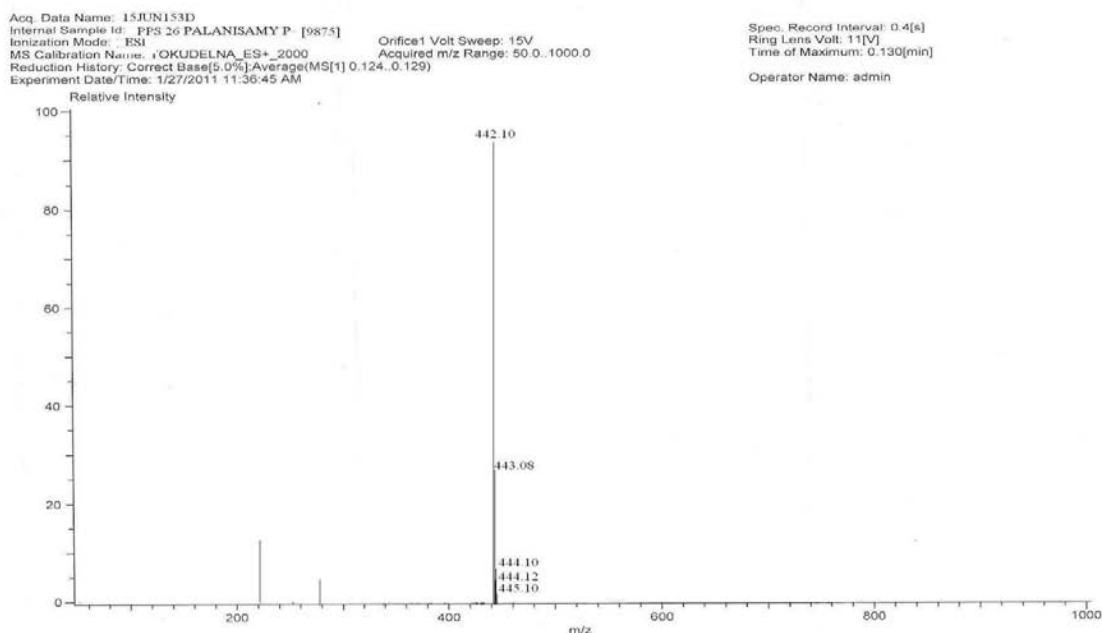

**Mass spectrum of *N*-(4-nitrophenyl)-1-phenyl-4,5-dihydro-1*H*-[1]benzothiepine[5,4-*c*]pyrazole-3-carboxamide (11e)**

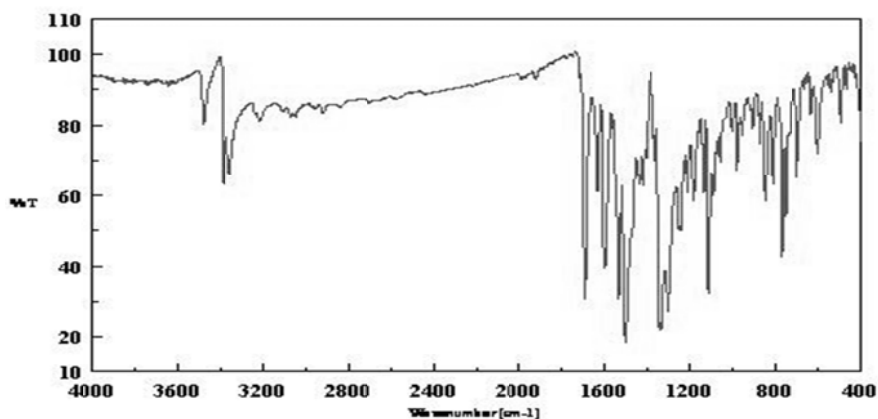

IR spectrum of 1-Phenyl-*N*-*m*-tolyl-4,5-dihydro-1*H*-[1]benzothiepine[5,4-*c*]pyrazole-3-carboxamide (11f)

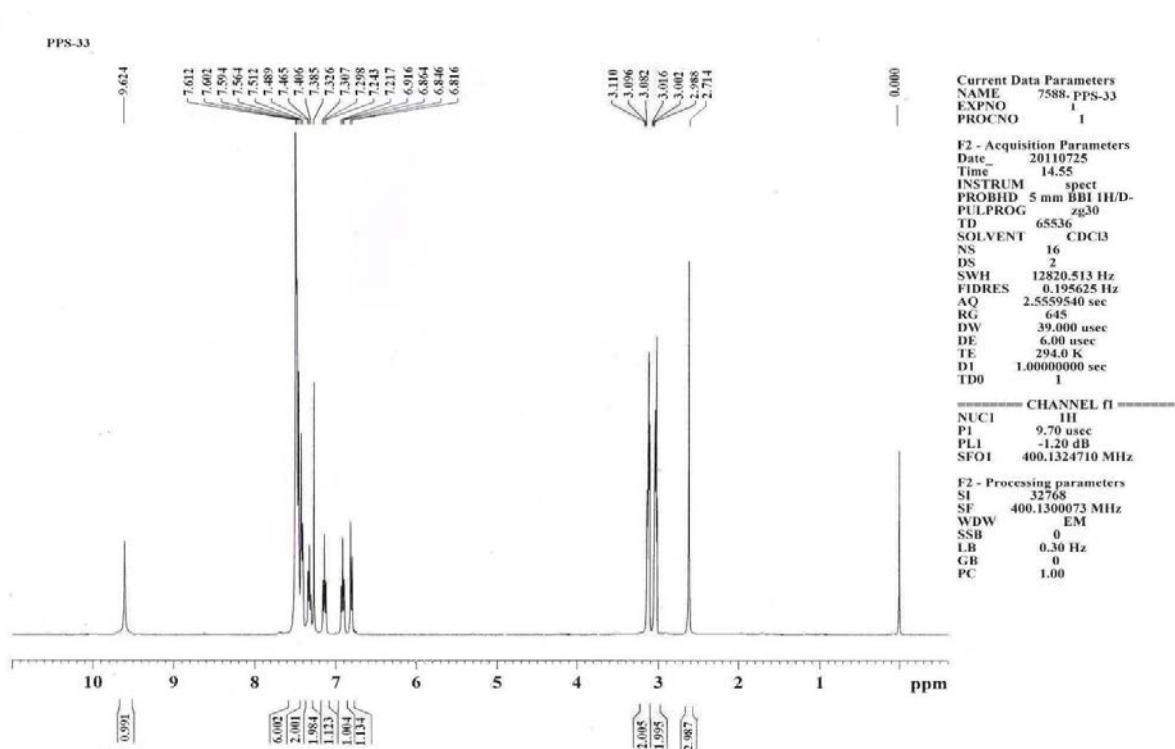

<sup>1</sup>H-NMR spectrum of 1-Phenyl-*N*-*m*-tolyl-4,5-dihydro-1*H*-[1]benzothiepine[5,4-*c*]pyrazole-3-carboxamide (11f)

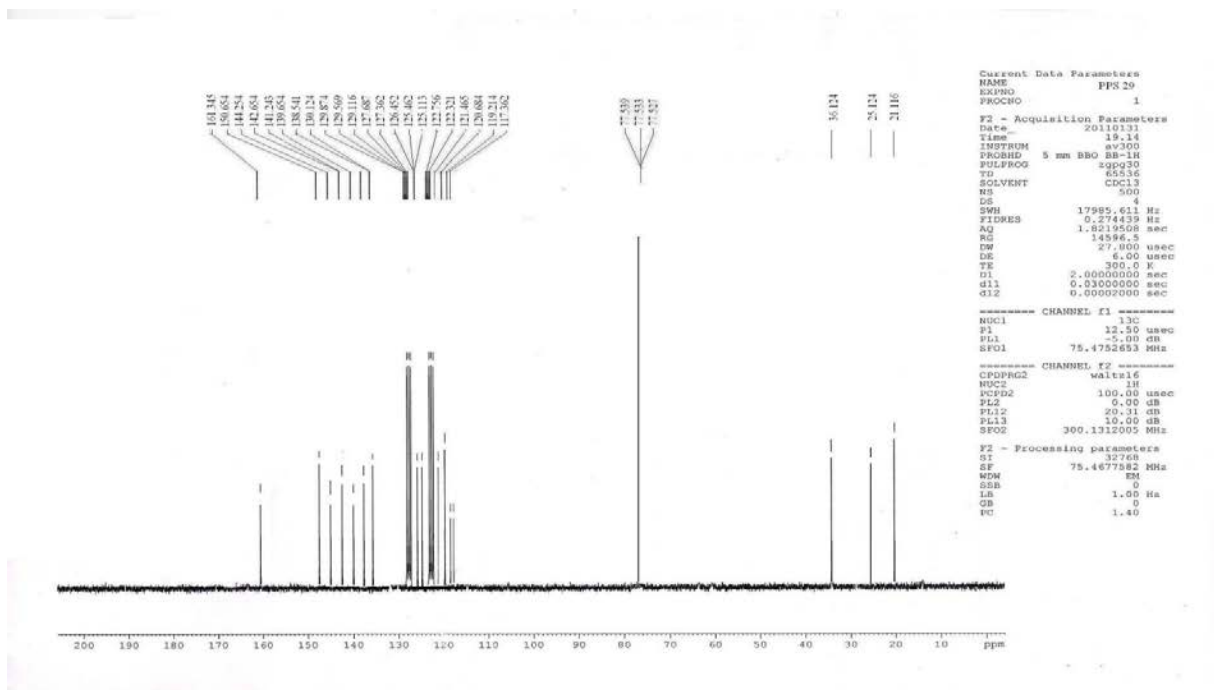

**<sup>13</sup>C-NMR spectrum of 1-Phenyl-N-m-tolyl-4,5-dihydro-1H-[1]benzothiepine[5,4-c]pyrazole-3-carboxamide (11f)**

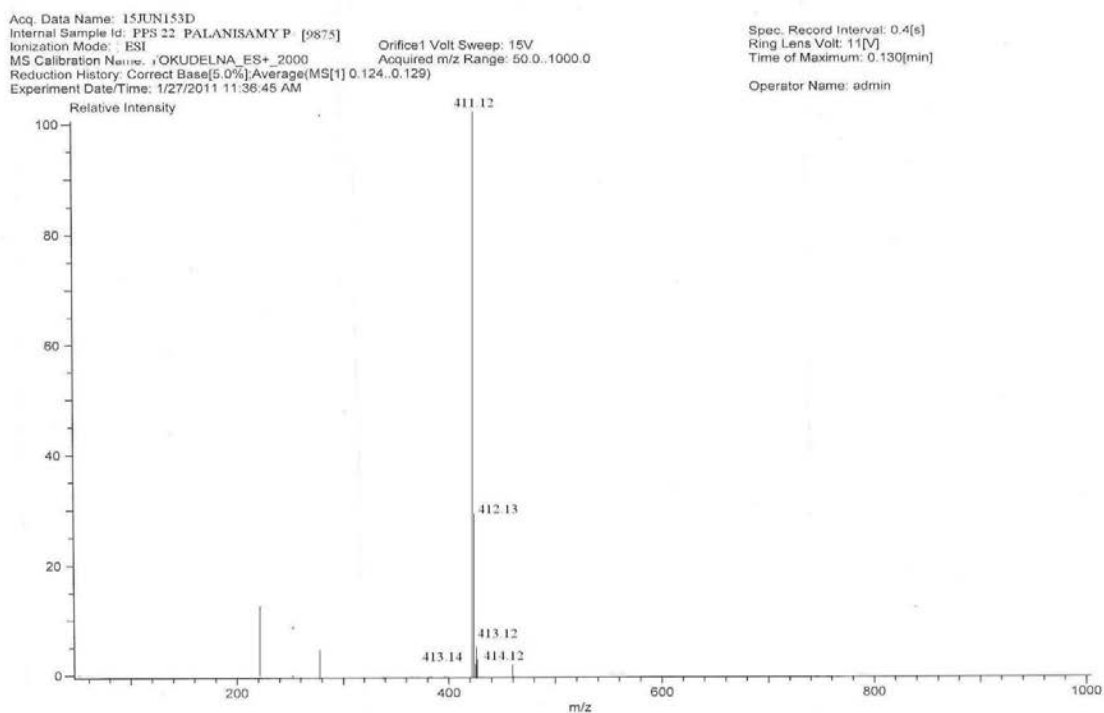

Mass spectrum of 1-Phenyl-*N*-*m*-tolyl-4,5-dihydro-1*H*-[1]benzothiepine[5,4-*c*]pyrazole-3-carboxamide (11f)

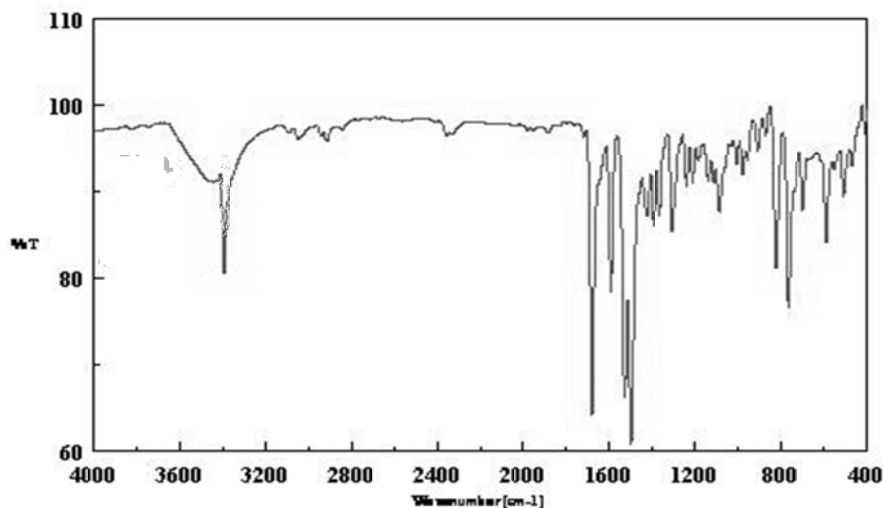

IR spectrum of 1-Phenyl-*N*-*p*-tolyl-4,5-dihydro-1*H*-[1]benzothiepine[5,4-*c*]pyrazole-3-carboxamide (11g)

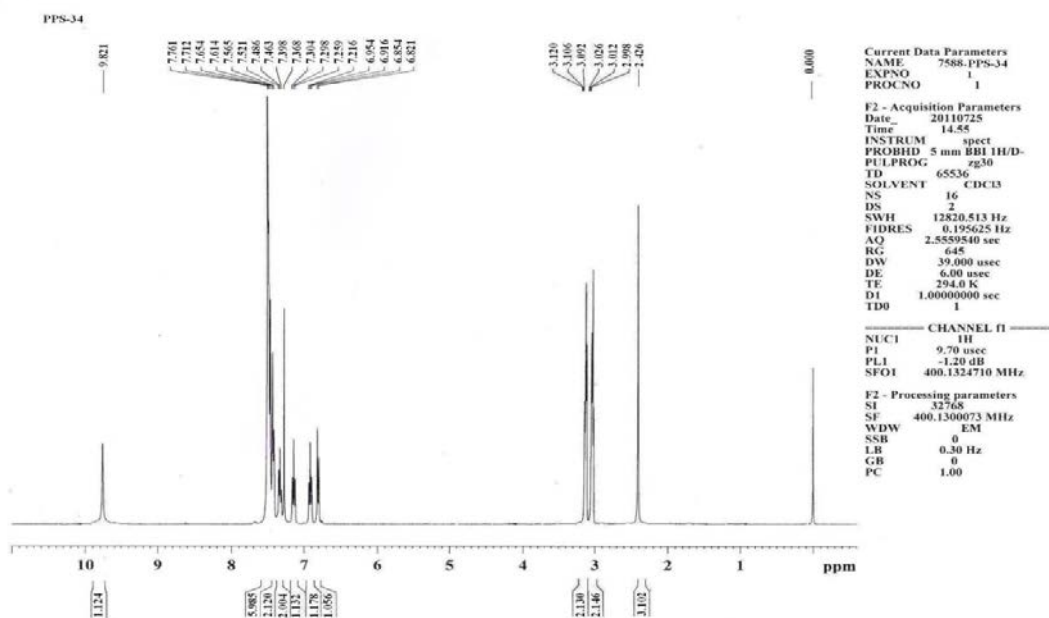

<sup>1</sup>H-NMR spectrum of 1-Phenyl-*N*-*p*-tolyl-4,5-dihydro-1*H*-[1]benzothiepine[5,4-*c*]pyrazole-3-carboxamide (11g)

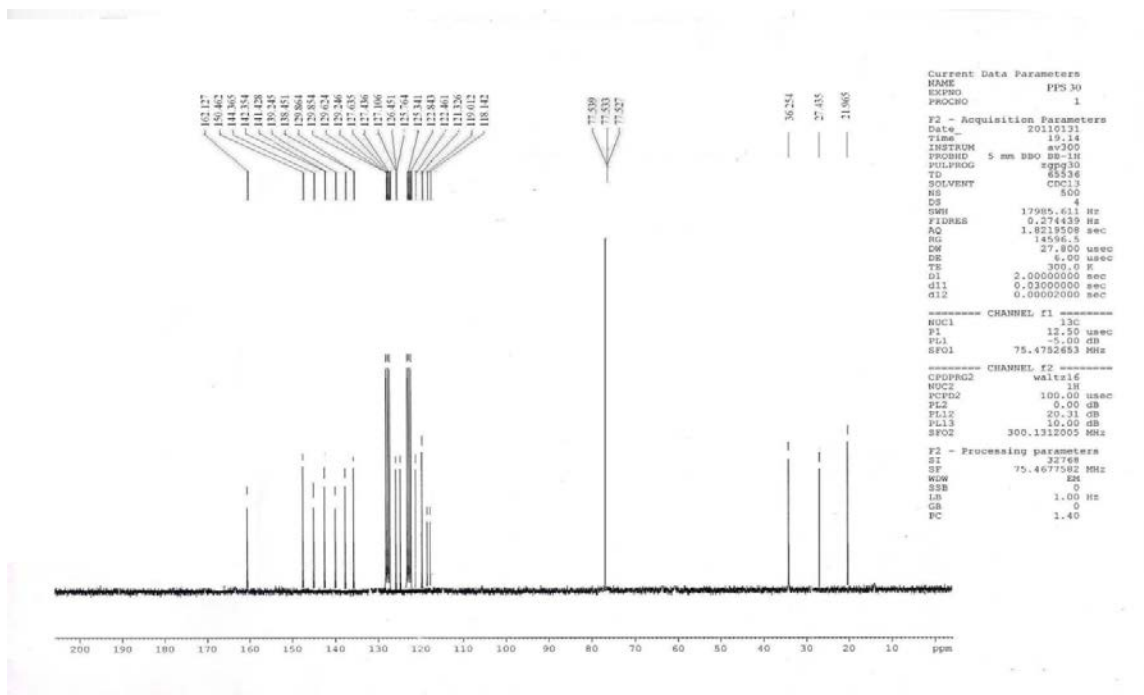

**<sup>13</sup>C-NMR spectrum of 1-Phenyl-*N*-*p*-tolyl-14,5-dihydro-1*H*-[1]benzothiepine[5,4-*c*]pyrazole-3-carboxamide (11g)**

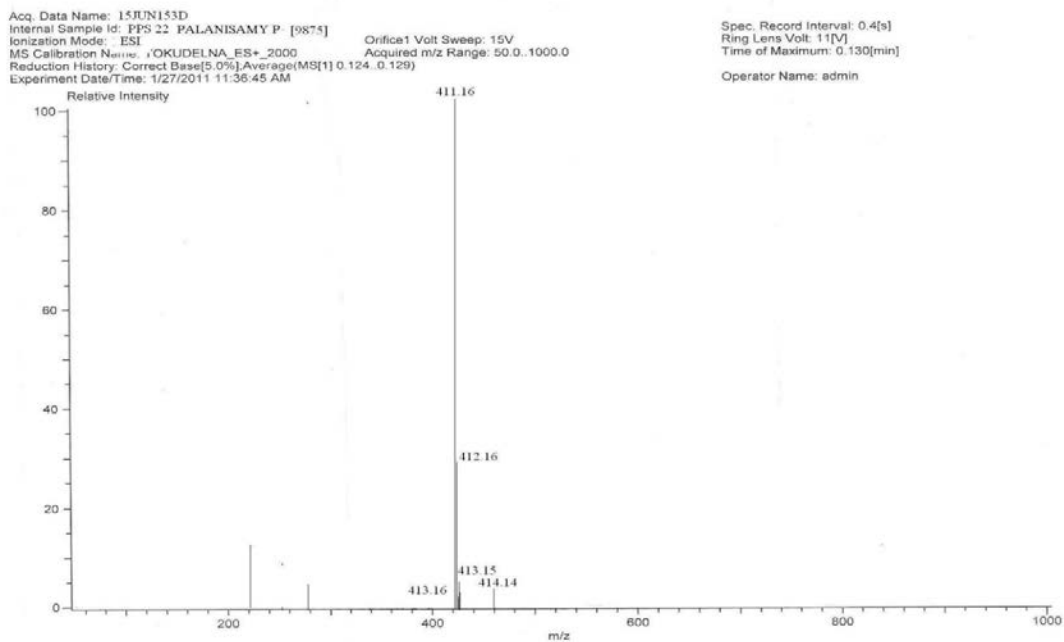

**Mass spectrum of 1-Phenyl-*N*-*p*-tolyl-14,5-dihydro-1*H*-[1]benzothiepine[5,4-*c*]pyrazole-3-carboxamide (11g)**

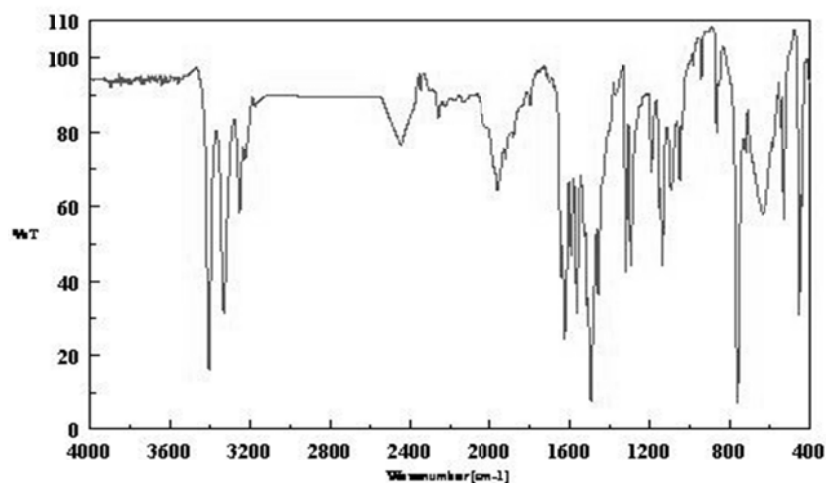

IR spectrum of *N*-(2-Aminophenyl)-1-phenyl-1,4-dihydrothiopheno[4,3-*c*]pyrazole-3-carboxamide (11h)

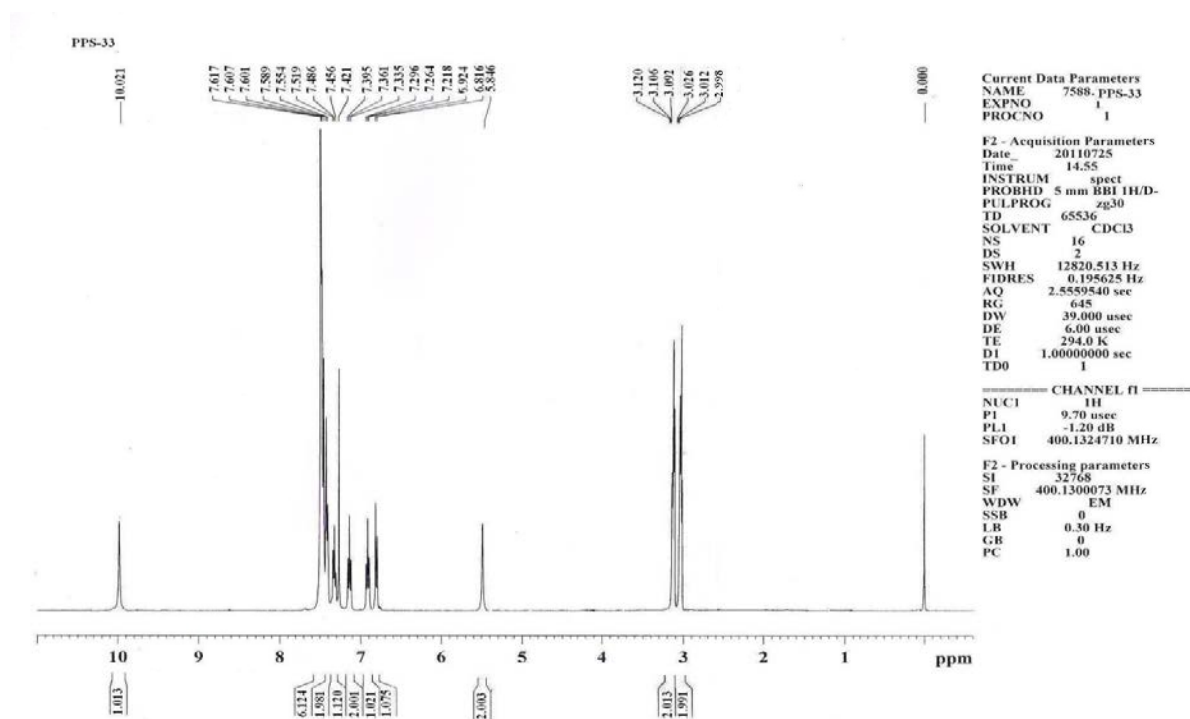

<sup>1</sup>H-NMR spectrum of *N*-(2-aminophenyl)-1-phenyl-4,5-dihydro-1*H*-[1]benzothiepine[5,4-*c*]pyrazole-3-carboxamide (11h)

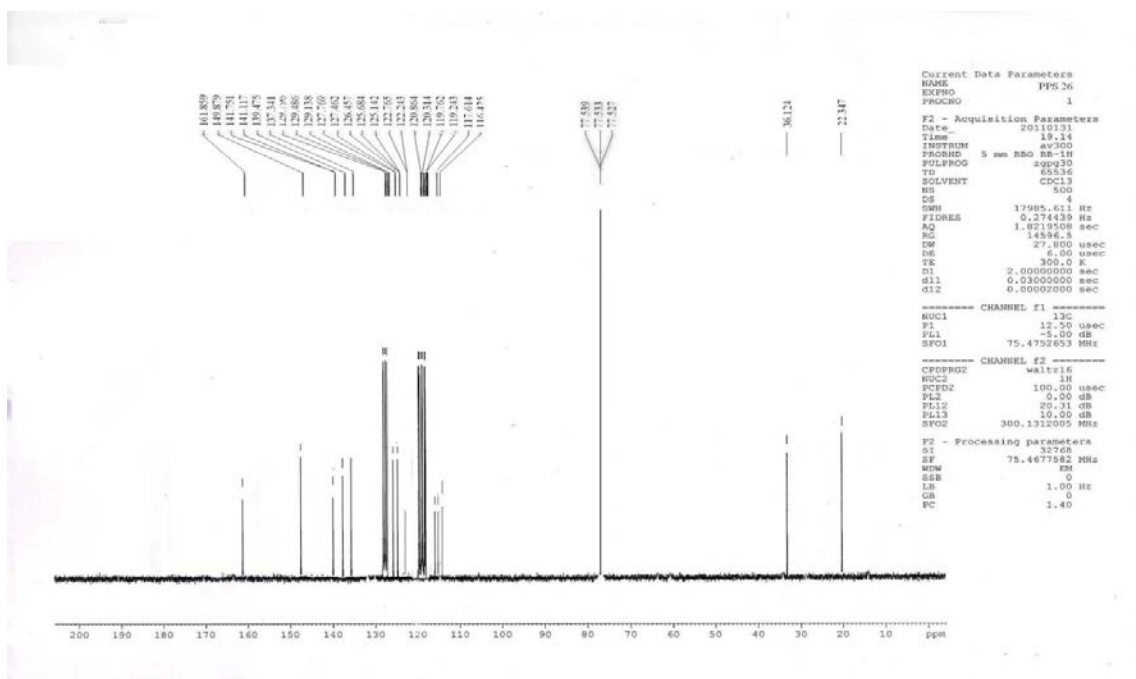

**<sup>13</sup>C-NMR spectrum of *N*-(2-aminophenyl)-1-phenyl-4,5-dihydro-1*H*-  
[1]benzothiepine[5,4-*c*]pyrazole-3-carboxamide (11h)**

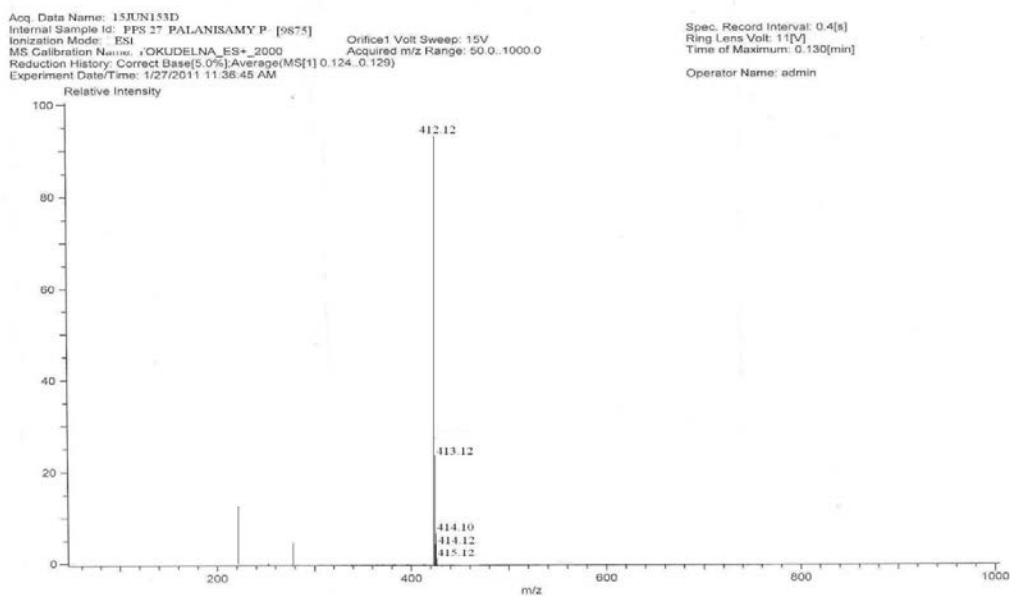

**Mass spectrum of *N*-(2-aminophenyl)-1-phenyl-4,5-dihydro-1*H*-  
[1]benzothiepine[5,4-*c*]pyrazole-3-carboxamide (11h)**



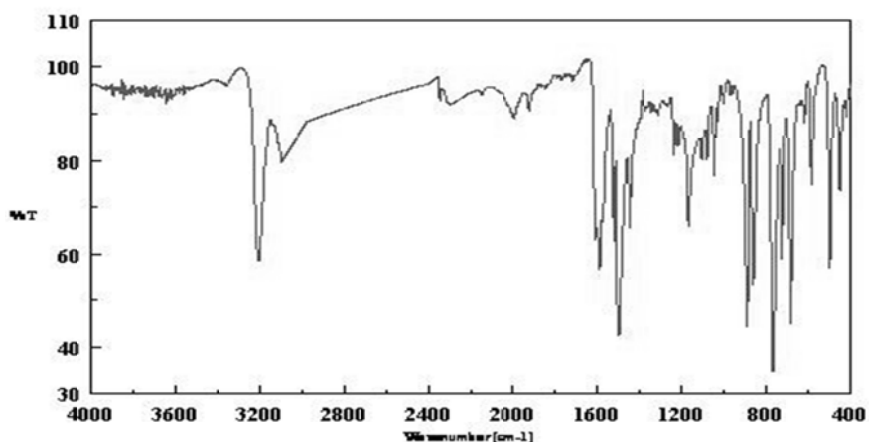

IR spectrum of *N'*,1-diphenyl-4,5-dihydro-1*H*-[1]benzothiepine[5,4-*c*]pyrazole-3-carbohydrazide (11i)

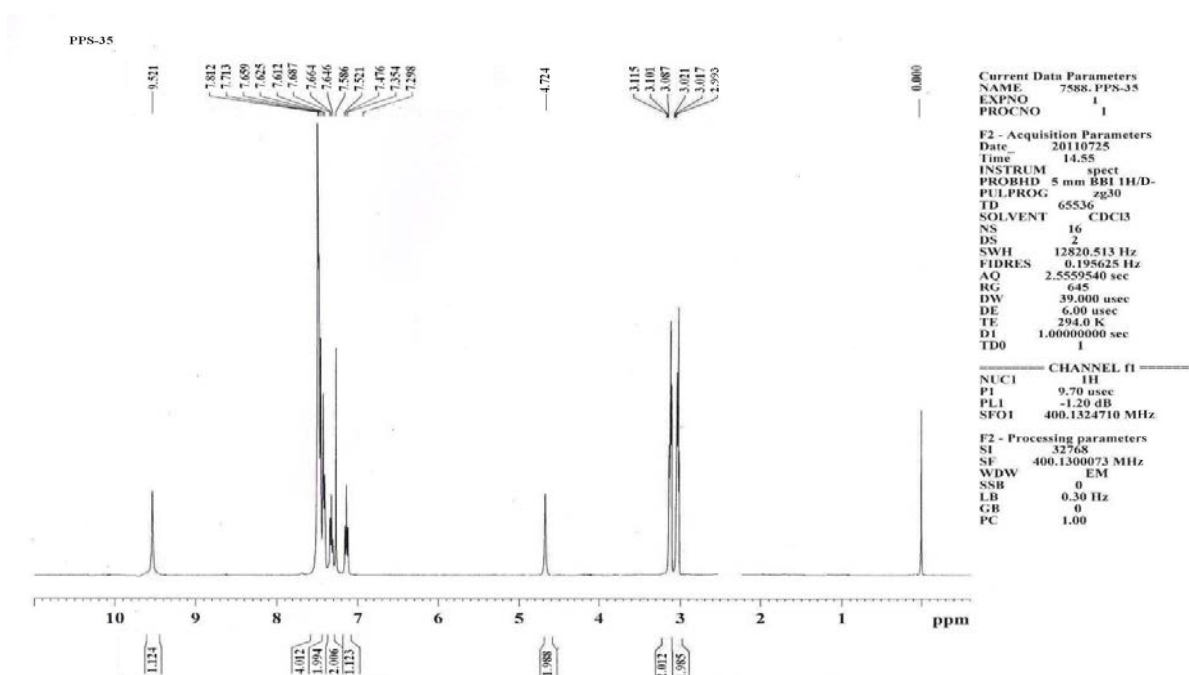

<sup>1</sup>H-NMR spectrum of *N'*,1-diphenyl-4,5-dihydro-1*H*-[1]benzothiepine[5,4-*c*]pyrazole-3-carbohydrazide (11i)

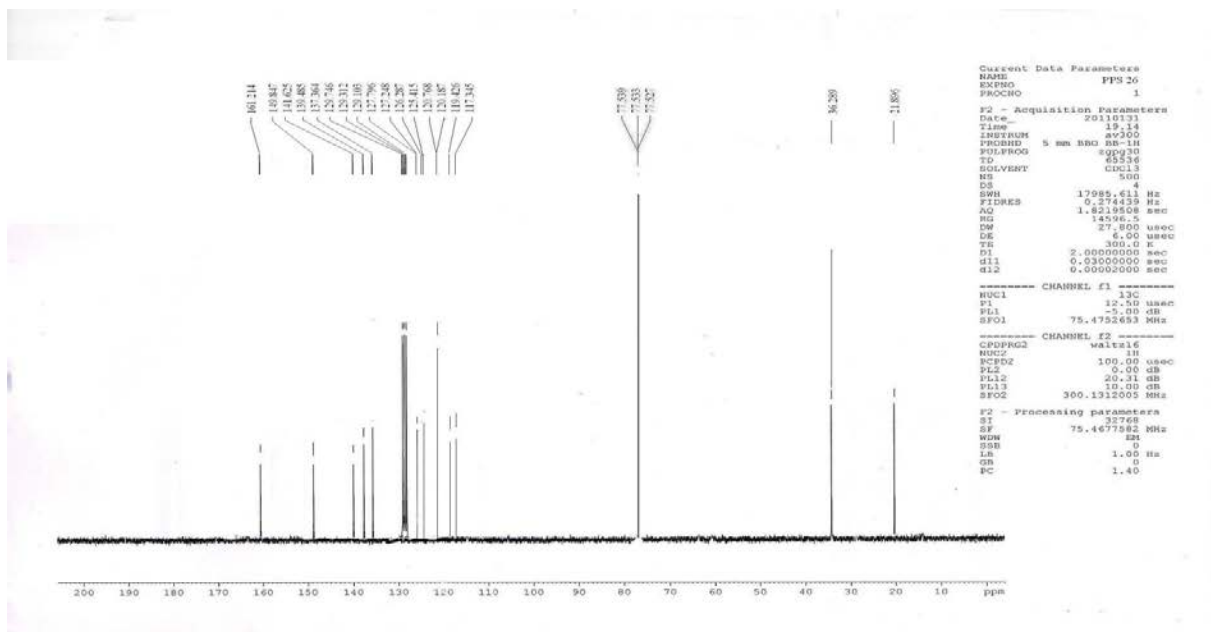

**<sup>13</sup>C-NMR spectrum of *N'*,1-diphenyl-4,5-dihydro-1*H*-[1]benzothiepine[5,4-*c*]pyrazole-3-carbohydrazide (11i)**

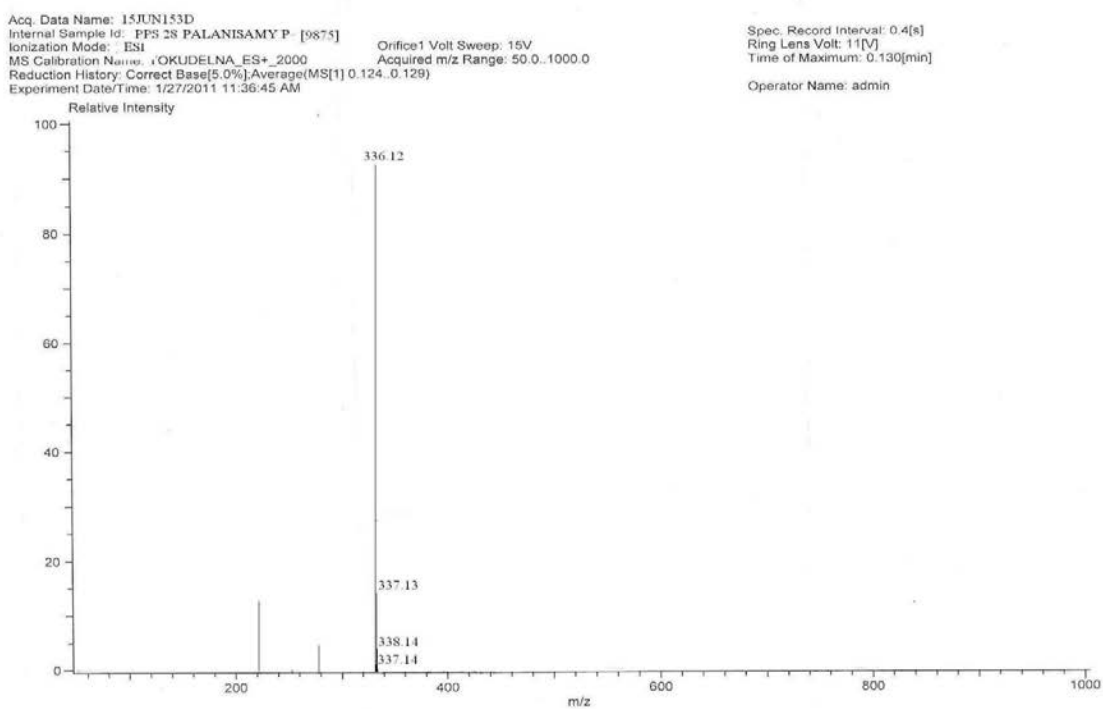

**Mass spectrum of 1-Phenyl-1,4-dihydrothiochromeno[4,3-*c*]pyrazole-3-carbohydrazide (11i)**

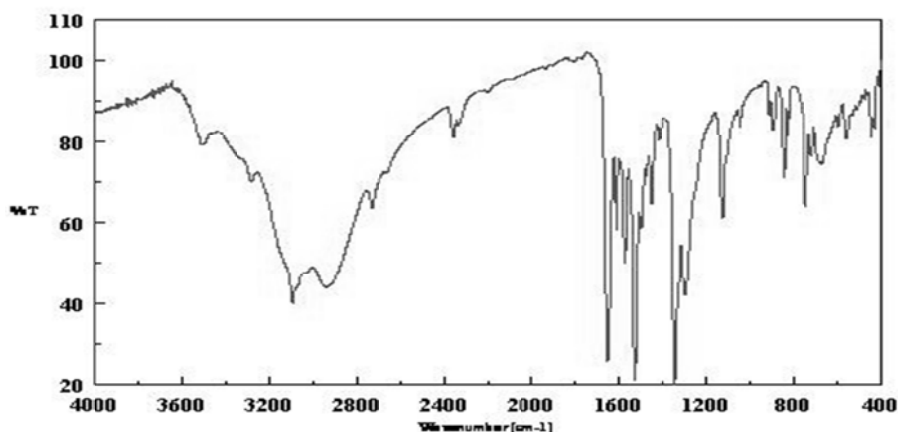

IR spectrum of *N'*,1-diphenyl-4,5-dihydro-1*H*-[1]benzothiepine[5,4-*c*]pyrazole-3-carbohydrazide (11j)

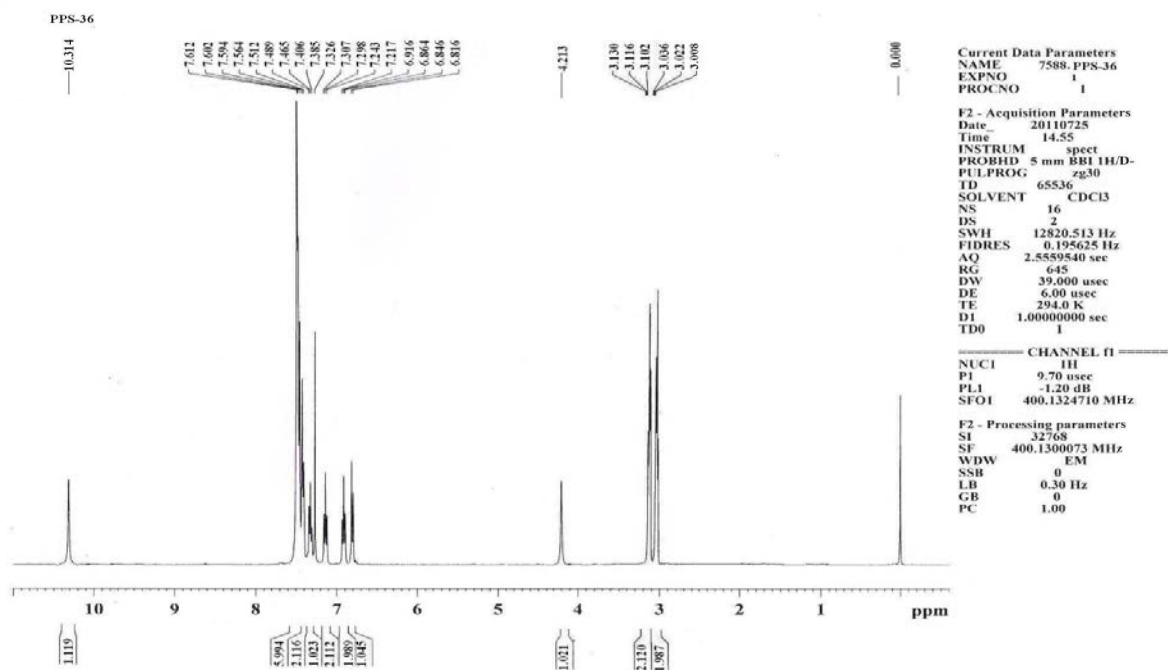

<sup>1</sup>H-NMR spectrum of *N'*,1-diphenyl-4,5-dihydro-1*H*-[1]benzothiepine[5,4-*c*]pyrazole-3-carbohydrazide (11j)

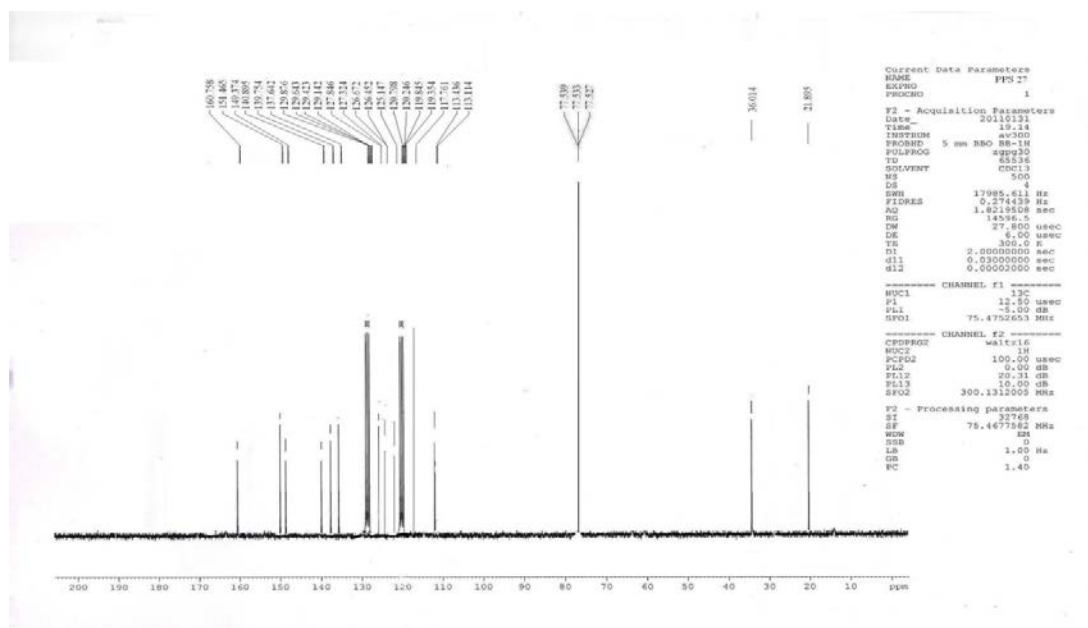

**<sup>13</sup>C-NMR spectrum of *N'*,1-diphenyl-4,5-dihydro-1*H*-[1]benzothiepine[5,4-*c*]pyrazole-3-carbohydrazide (11j)**

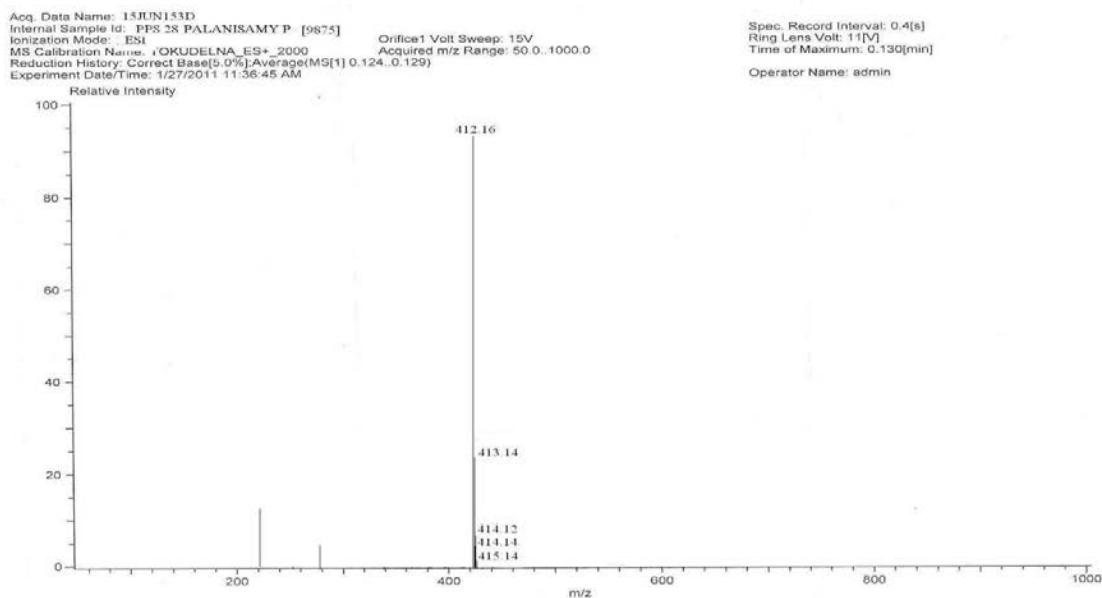

**Mass spectrum of *N'*,1-diphenyl-4,5-dihydro-1*H*-[1]benzothiepine[5,4-*c*]pyrazole-3-carbohydrazide (11j)**

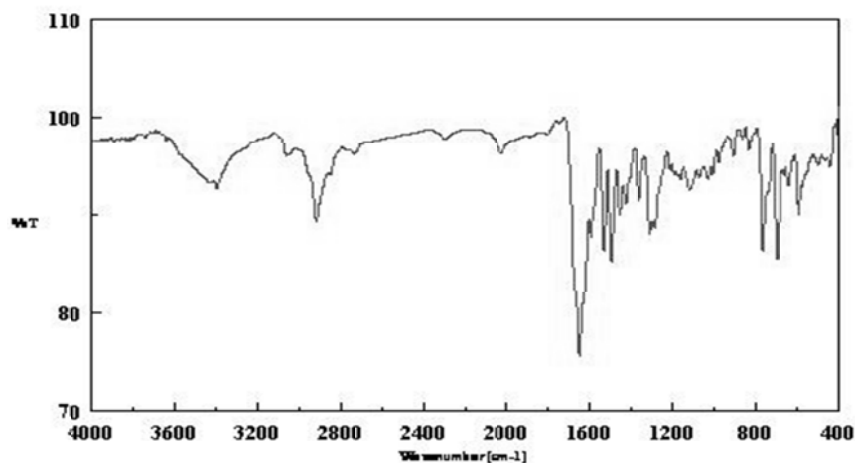

IR spectrum of *N*-(1, 5-Dimethyl-3-oxo-2-phenyl-2,3-dihydro-1H-pyrazol-4-yl)-1-phenyl-4,5-dihydro-1H-[1]benzothiepine[5,4-c]pyrazole-3-carboxamide (11k)

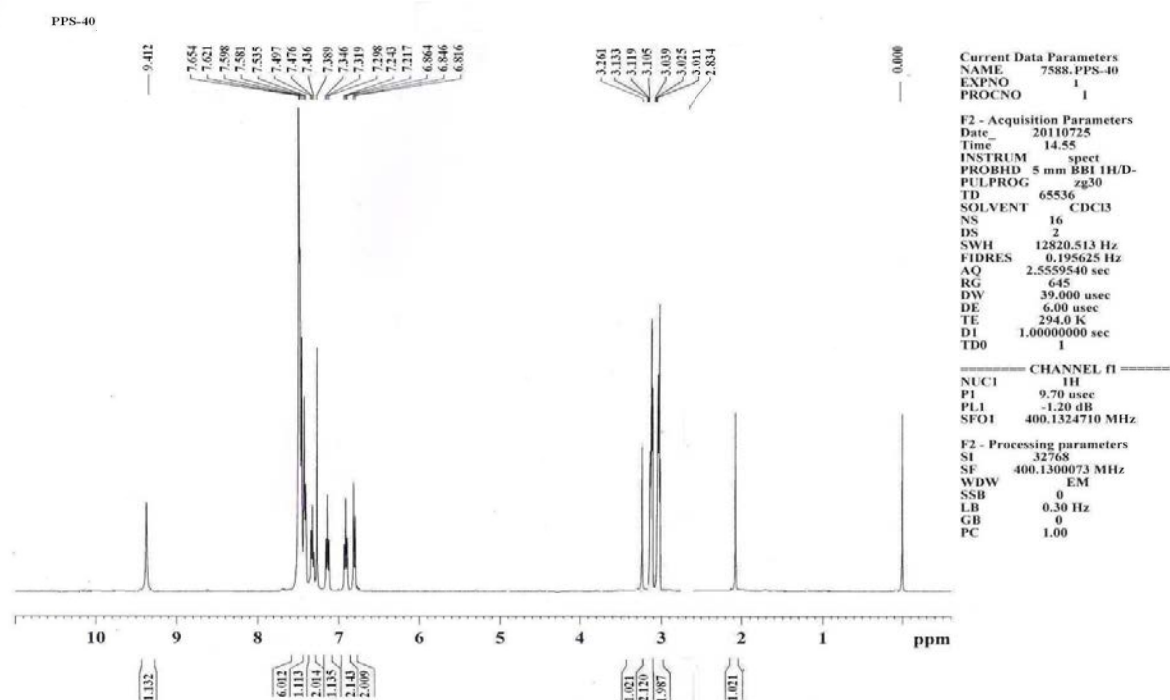

$^1\text{H}$ -NMR spectrum of *N*-(1, 5-Dimethyl-3-oxo-2-phenyl-2,3-dihydro-1H-pyrazol-4-yl)-1-phenyl-4,5-dihydro-1H-[1]benzothiepine[5,4-c]pyrazole-3-carboxamide (11k)

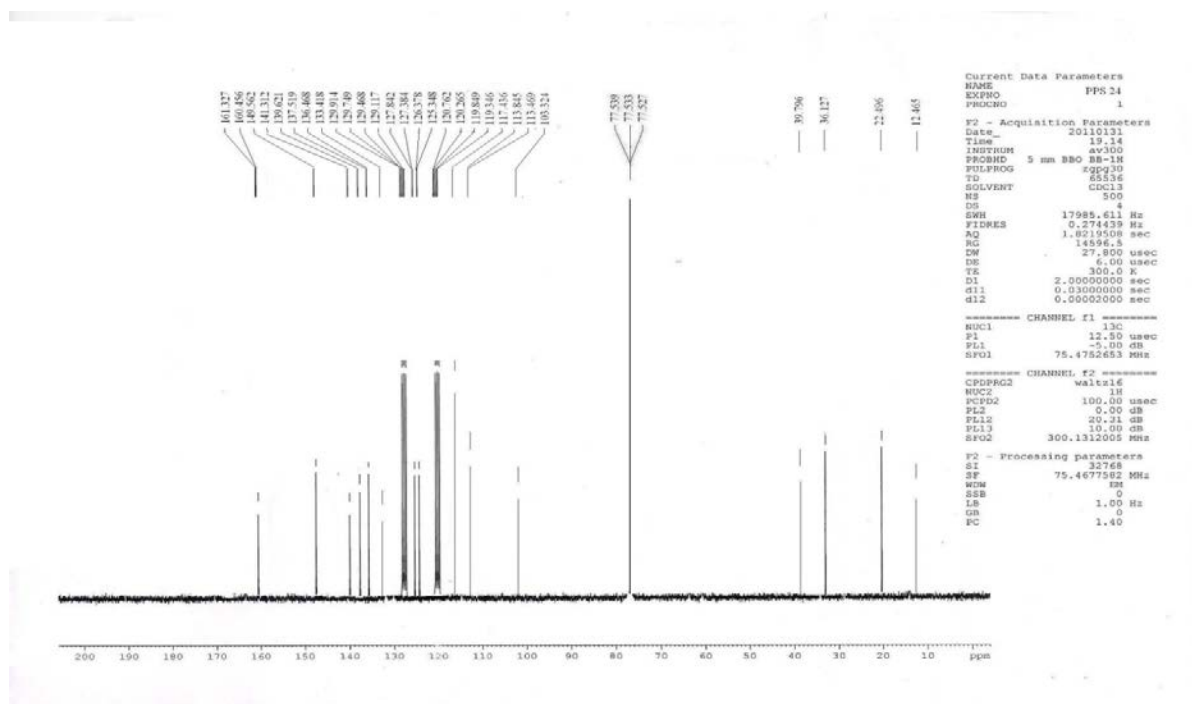

**<sup>13</sup>C-NMR spectrum of *N*-(1, 5-Dimethyl-3-oxo-2-phenyl-2,3-dihydro-1H-pyrazol-4-yl)-1-phenyl-4,5-dihydro-1H-[1]benzothiepine[5,4-*c*]pyrazole-3-carboxamide (11k)**

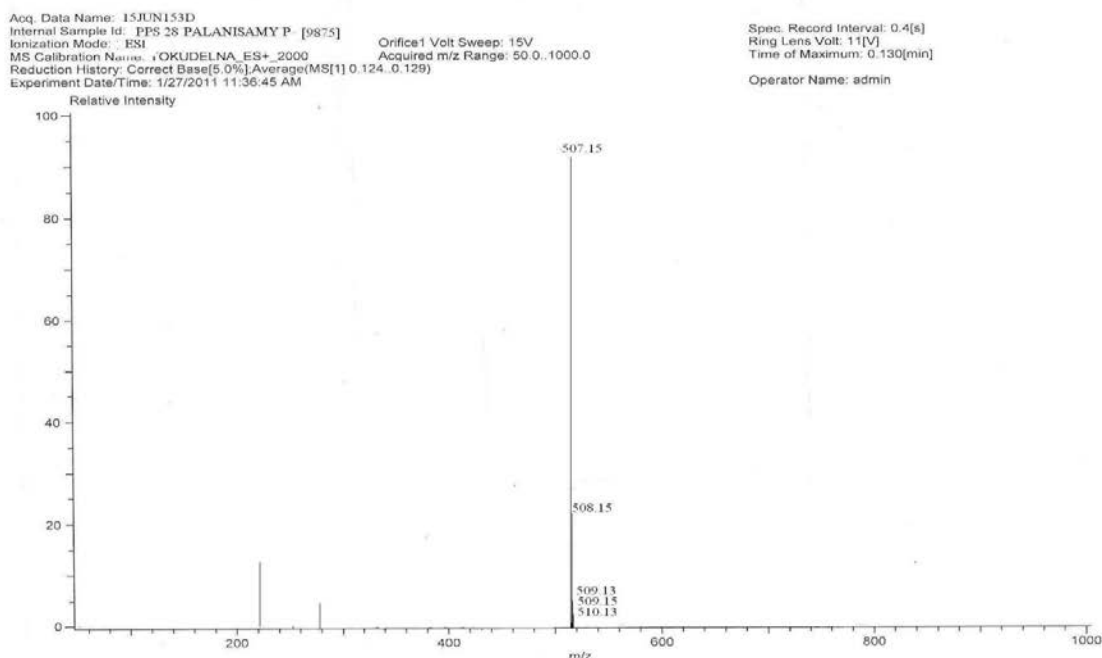

**Mass spectrum of *N*-(1, 5-Dimethyl-3-oxo-2-phenyl-2,3-dihydro-1H-pyrazol-4-yl)-1-phenyl-4,5-dihydro-1H-[1]benzothiepine[5,4-*c*]pyrazole-3-carboxamide (11k)**

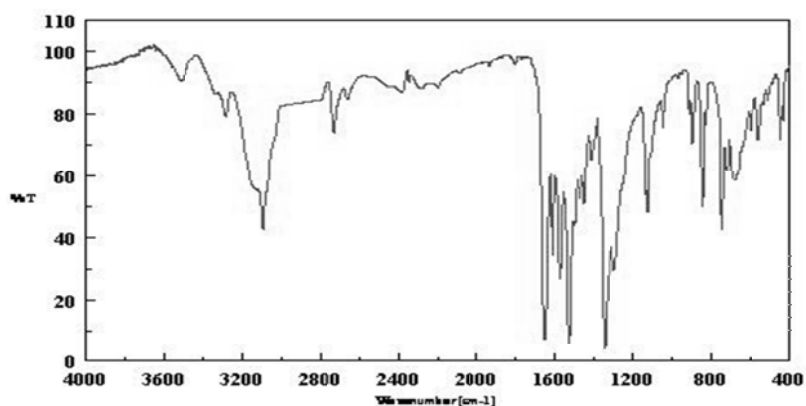

IR spectrum of *N*-(1,3-benzothiazol-2-yl)-1-phenyl-4,5-dihydro-1*H*-  
[1]benzothiepine[5,4-*c*]pyrazole-3-carboxamide (11)

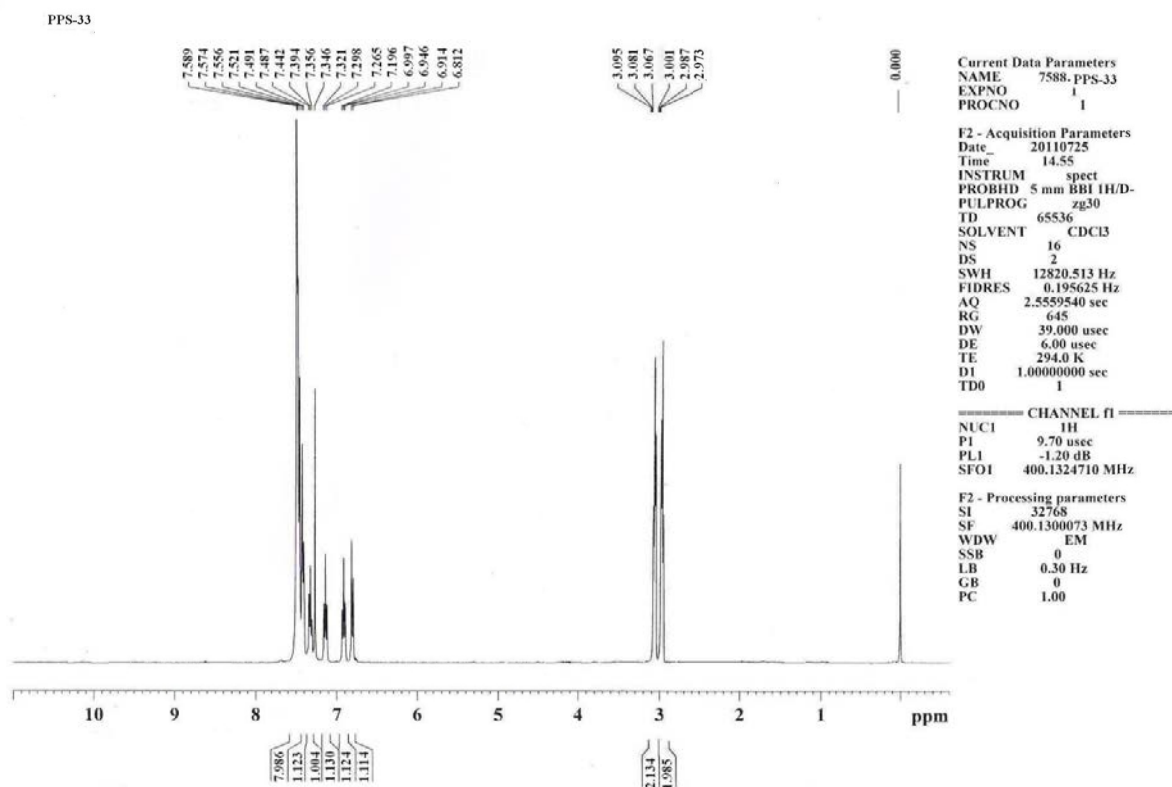

<sup>1</sup>H-NMR spectrum of *N*-(1,3-benzothiazol-2-yl)-1-phenyl-4,5-dihydro-1*H*-  
[1]benzothiepine[5,4-*c*]pyrazole-3-carboxamide (11)

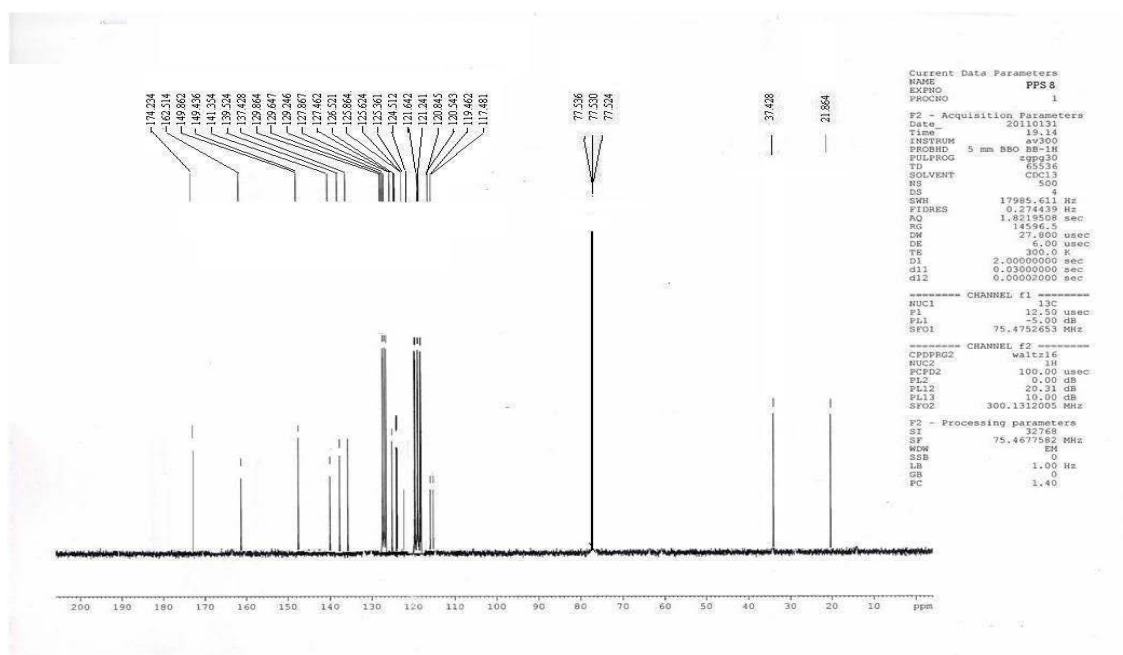

**<sup>13</sup>C-NMR spectrum of *N*-(1,3-benzothiazol-2-yl)-1-phenyl-4,5-dihydro-1*H*-[1]benzothiepine[5,4-*c*]pyrazole-3-carboxamide (11)**

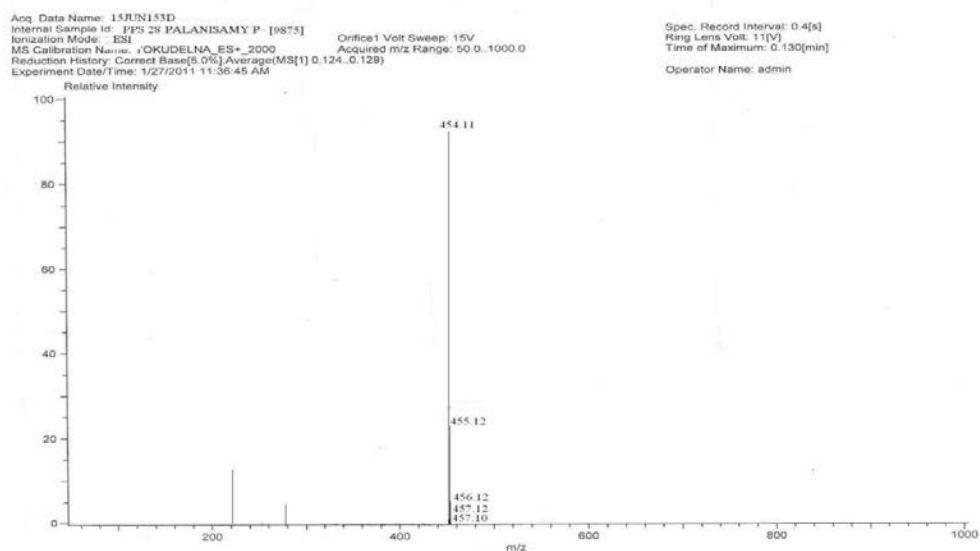

**Mass spectrum of *N*-(1,3-benzothiazol-2-yl)-1-phenyl-4,5-dihydro-1*H*-[1]benzothiepine[5,4-*c*]pyrazole-3-carboxamide (11)**



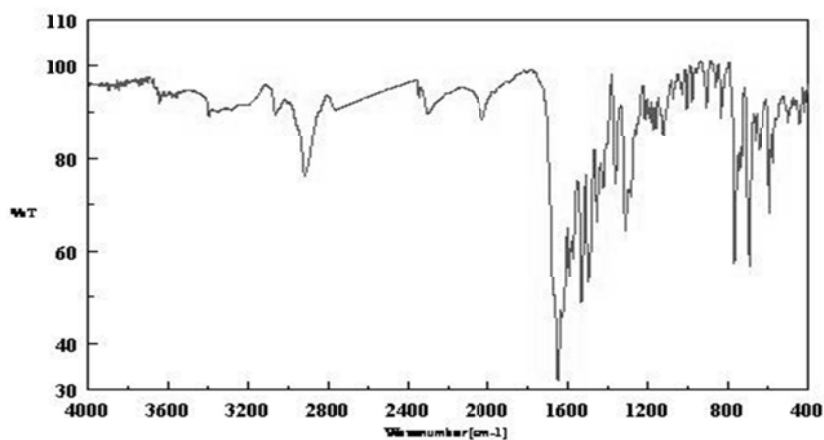

IR spectrum of *N*-(Naphthalen-1-yl)-1-phenyl-4,5-dihydro-1*H*-[1]benzothiepine[5,4-*c*]pyrazole-3-carboxamide (11m)

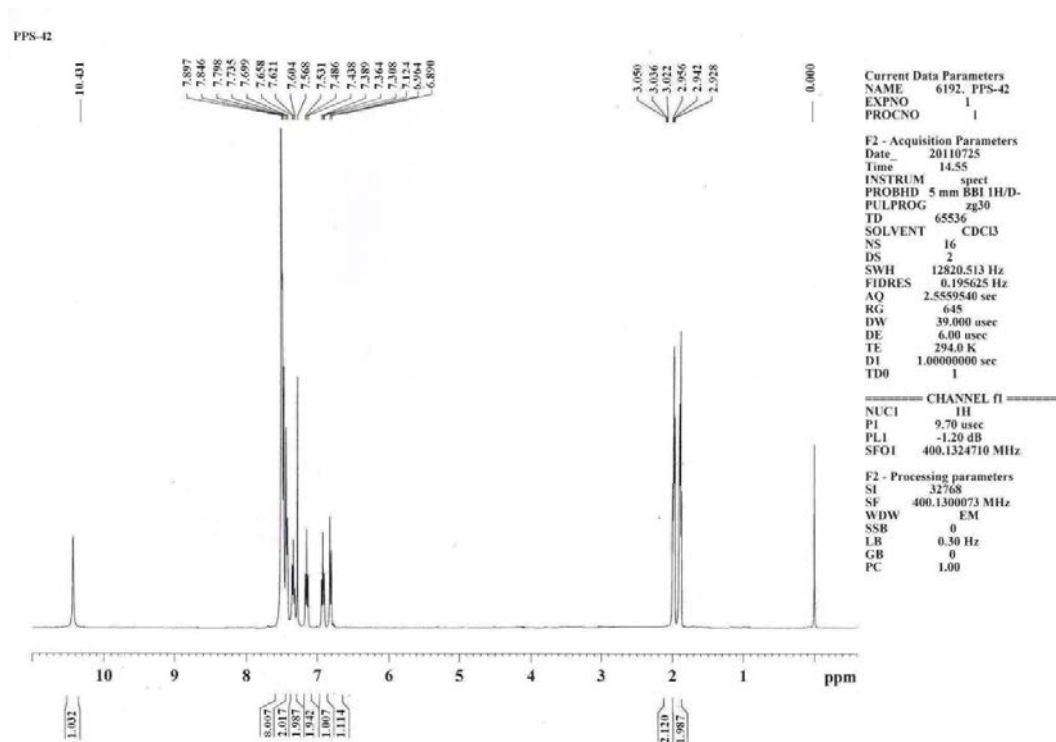

<sup>13</sup>C-NMR spectrum of *N*-(Naphthalen-1-yl)-1-phenyl-4,5-dihydro-1*H*-[1]benzothiepine[5,4-*c*]pyrazole-3-carboxamide (11m)

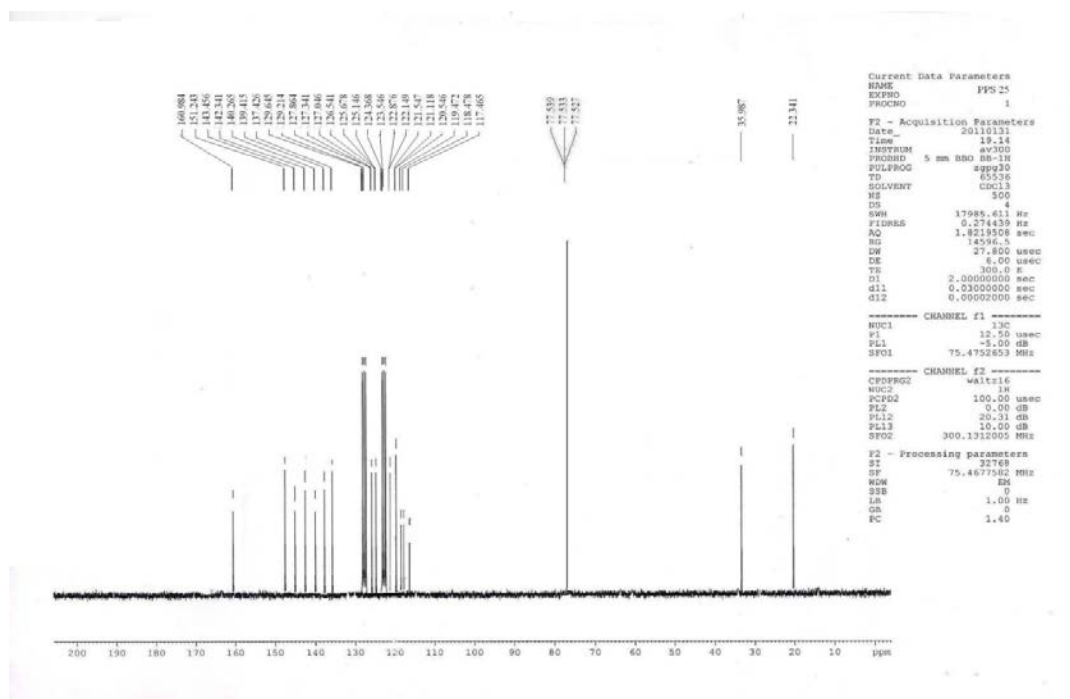

**<sup>13</sup>C-NMR spectrum of *N*-(Naphthalen-1-yl)-1-phenyl-4,5-dihydro-1*H*-[1]benzothiepine[5,4-*c*]pyrazole-3-carboxamide (11m)**

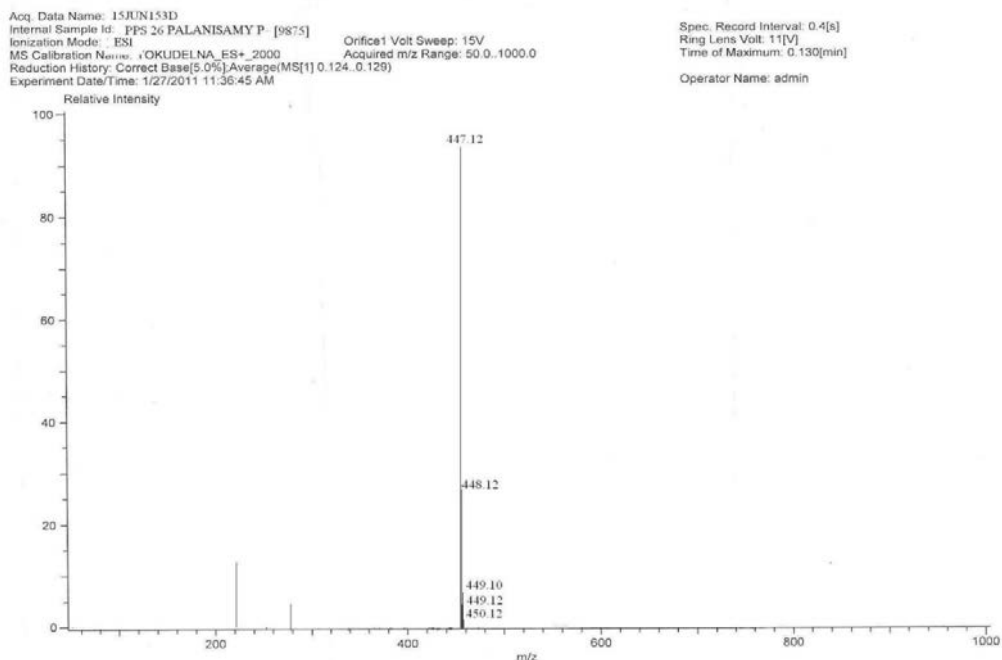

**Mass spectrum of *N*-(Naphthalen-1-yl)-1-phenyl-4,5-dihydro-1*H*-[1]benzothiepine[5,4-*c*]pyrazole-3-carboxamide (11m)**

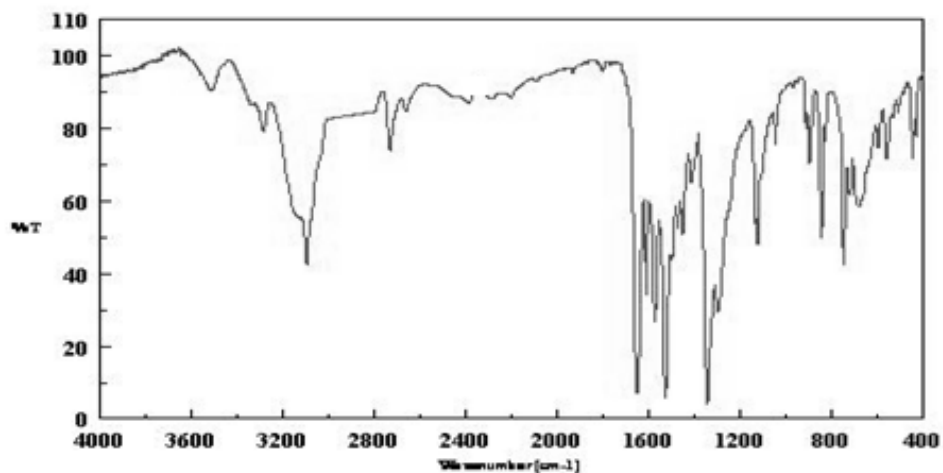

IR spectrum of N,1-diphenyl-4,5-dihydro-1H-[1]benzothiepine[5,4-c]pyrazole-3-carboxamide 6,6-dioxide (12a)

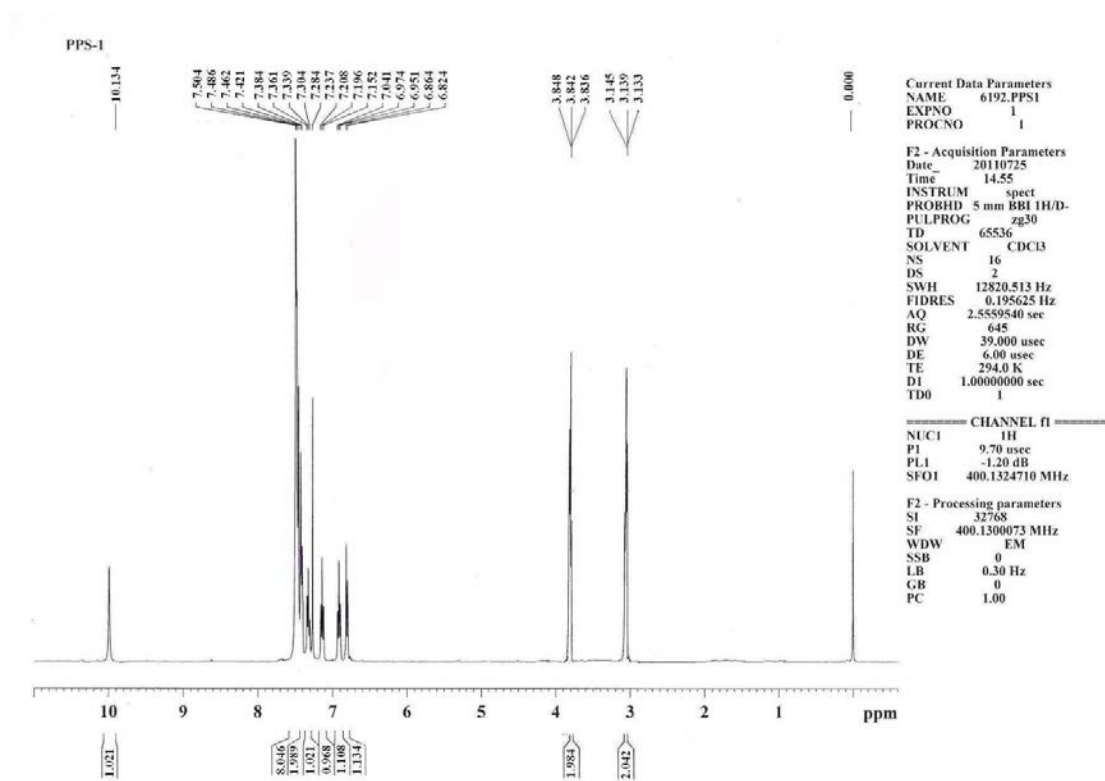

<sup>1</sup>H-NMR spectrum of N,1-diphenyl-4,5-dihydro-1H-[1]benzothiepine[5,4-c]pyrazole-3-carboxamide 6,6-dioxide (12a)

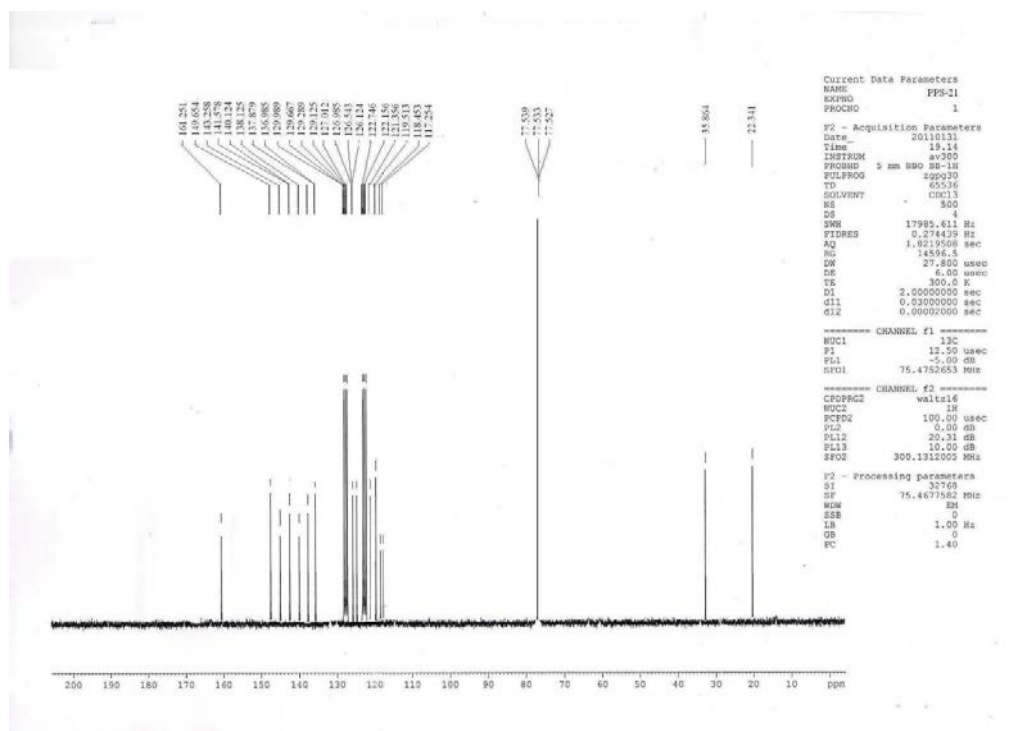

**$^{13}\text{C}$ -NMR spectrum of N,1-diphenyl-4,5-dihydro-1H-[1]benzothiepine[5,4-c]pyrazole-3-carboxamide 6,6-dioxide (12a)**

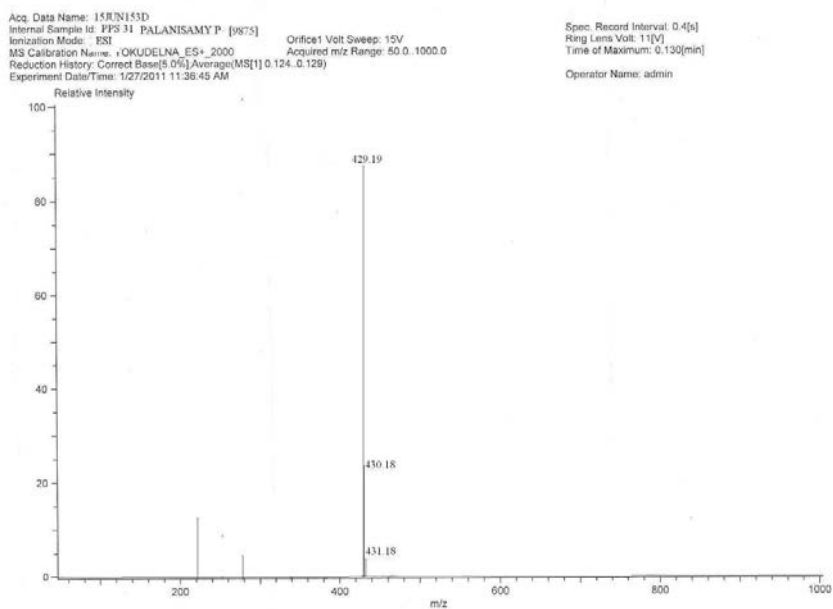

**Mass spectrum of N,1-diphenyl-4,5-dihydro-1H-[1]benzothiepine[5,4-c]pyrazole-3-carboxamide 6,6-dioxide (12a)**

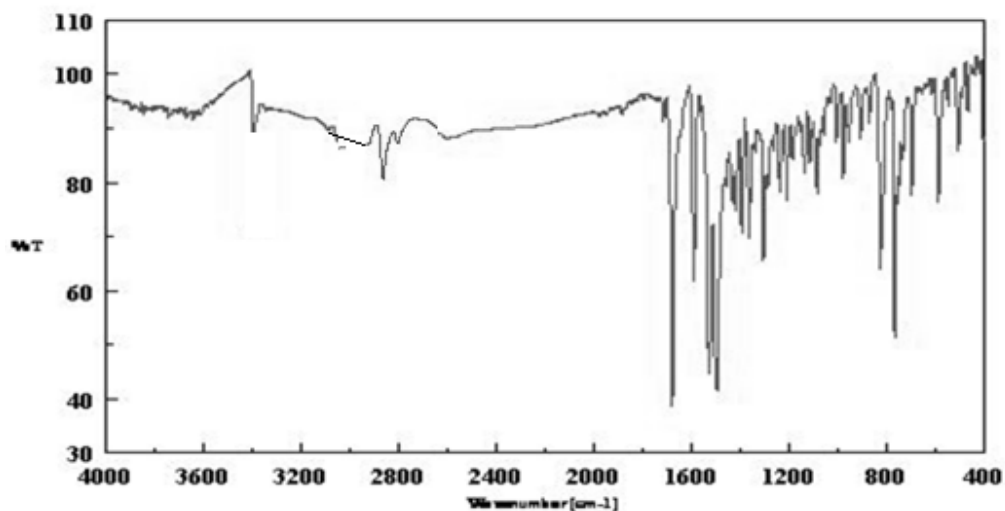

IR spectrum of N-(3-chlorophenyl)-1-phenyl-4,5-dihydro-1H-[1]benzothiepine[5,4-c]pyrazole-3-carboxamide 6,6-dioxide (12b)

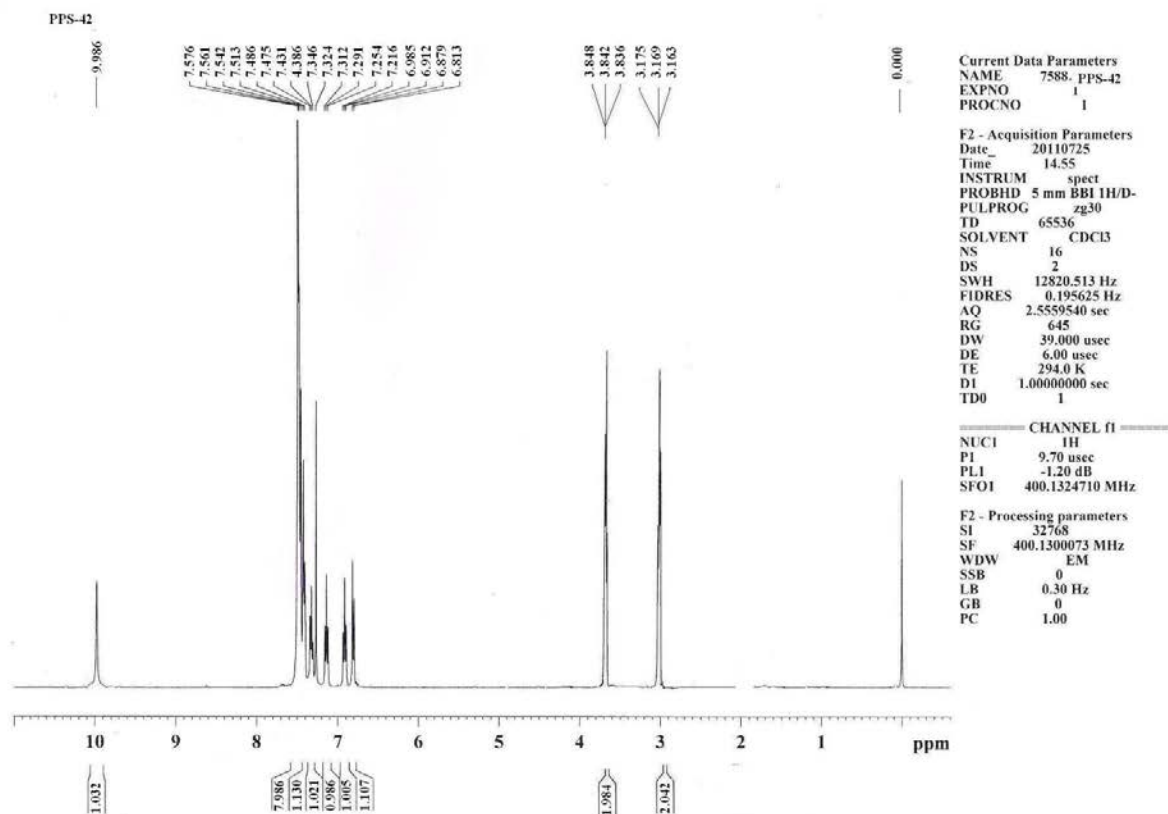

<sup>1</sup>H-NMR spectrum of N-(3-chlorophenyl)-1-phenyl-4,5-dihydro-1H-[1]benzothiepine[5,4-c]pyrazole-3-carboxamide 6,6-dioxide (12b)

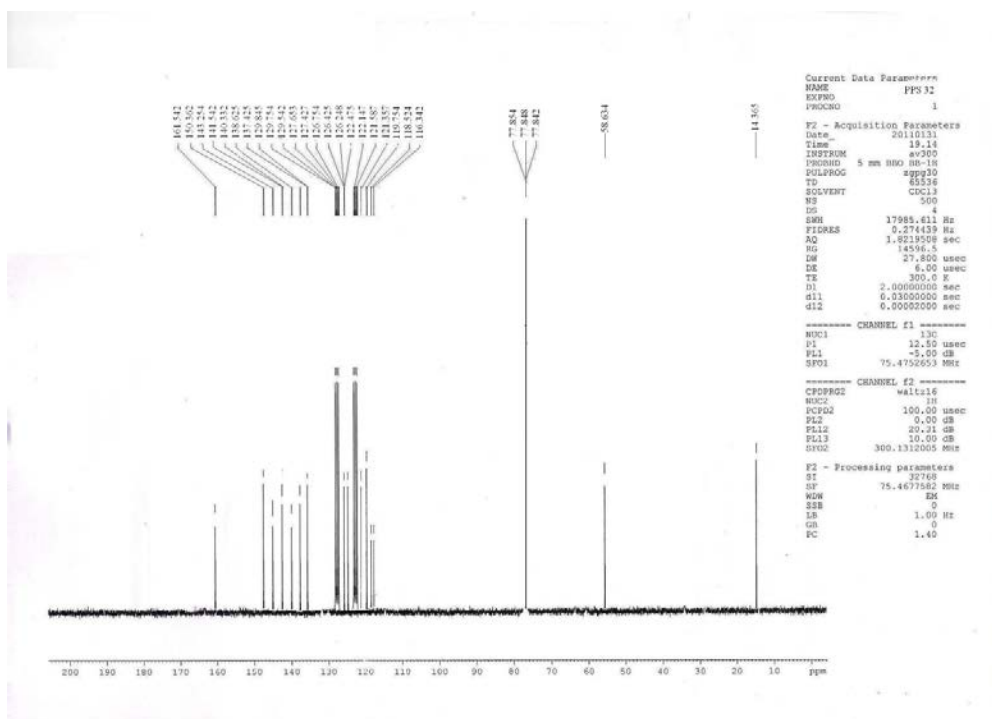

**<sup>13</sup>C-NMR spectrum of N-(3-chlorophenyl)-1-phenyl-4,5-dihydro-1H-[1]benzothiepiino[5,4-c]pyrazole-3-carboxamide 6,6-dioxide (12b)**

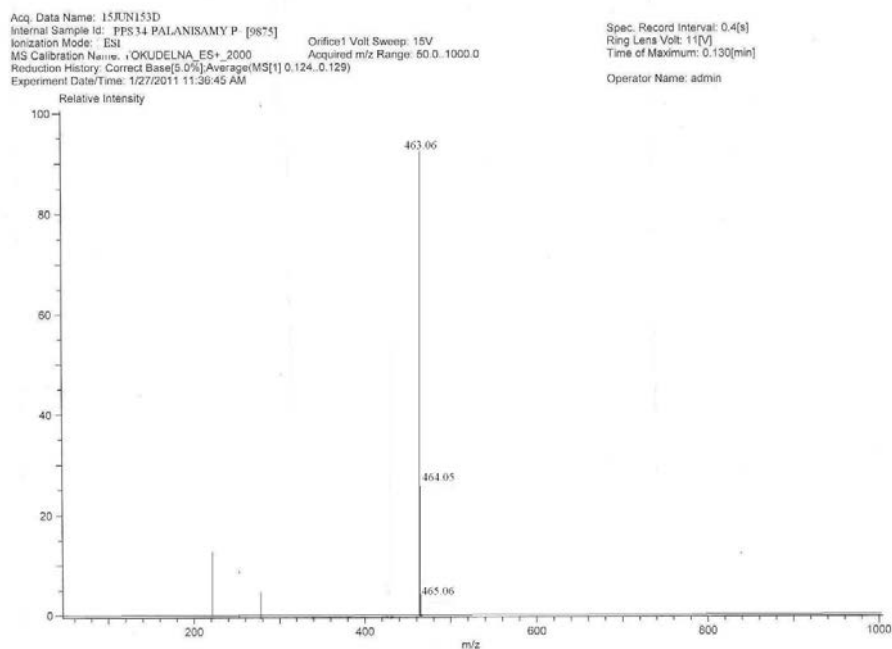

**Mass spectrum of N-(3-chlorophenyl)-1-phenyl-4,5-dihydro-1H-[1]benzothiepiino[5,4-c]pyrazole-3-carboxamide 6,6-dioxide (12b)**

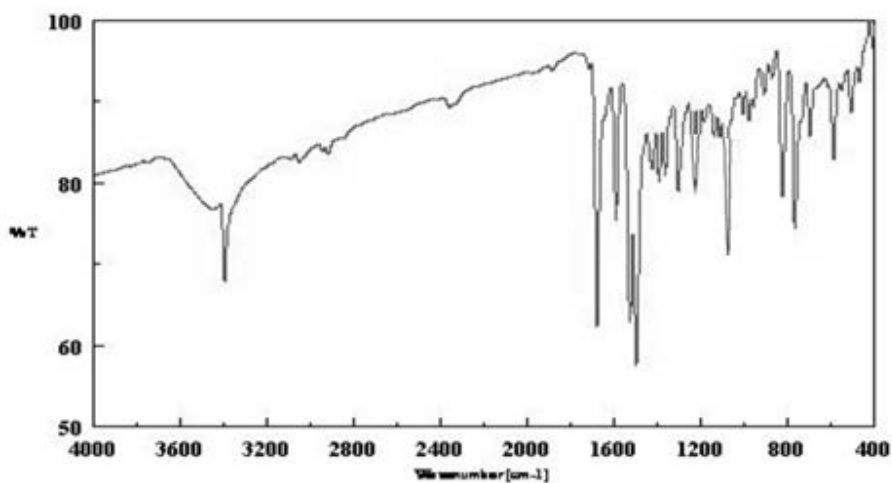

IR spectrum of N-(4-chlorophenyl)-1-phenyl-4,5-dihydro-1H-[1]benzothiepine[5,4-c]pyrazole-3-carboxamide 6,6-dioxide (12c)

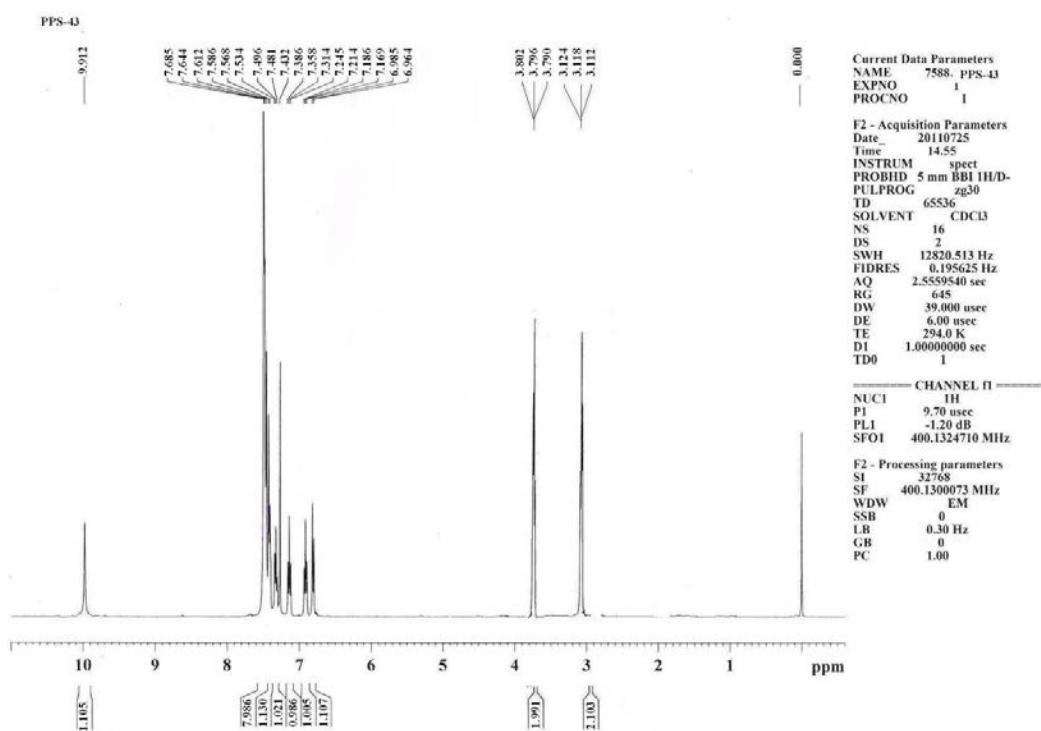

<sup>1</sup>H-NMR spectrum of N-(4-chlorophenyl)-1-phenyl-4,5-dihydro-1H-[1]benzothiepine[5,4-c]pyrazole-3-carboxamide 6,6-dioxide (12c)

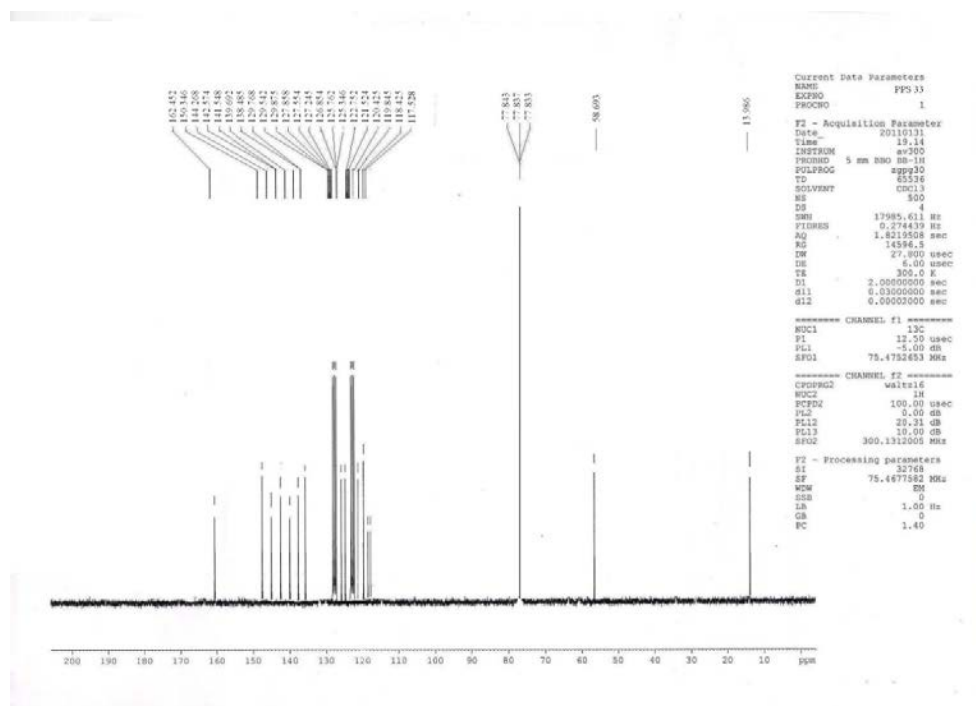

**<sup>13</sup>C-NMR spectrum of N-(4-chlorophenyl)-1-phenyl-4,5-dihydro-1H-[1]benzothiepine[5,4-c]pyrazole-3-carboxamide 6,6-dioxide (12c)**

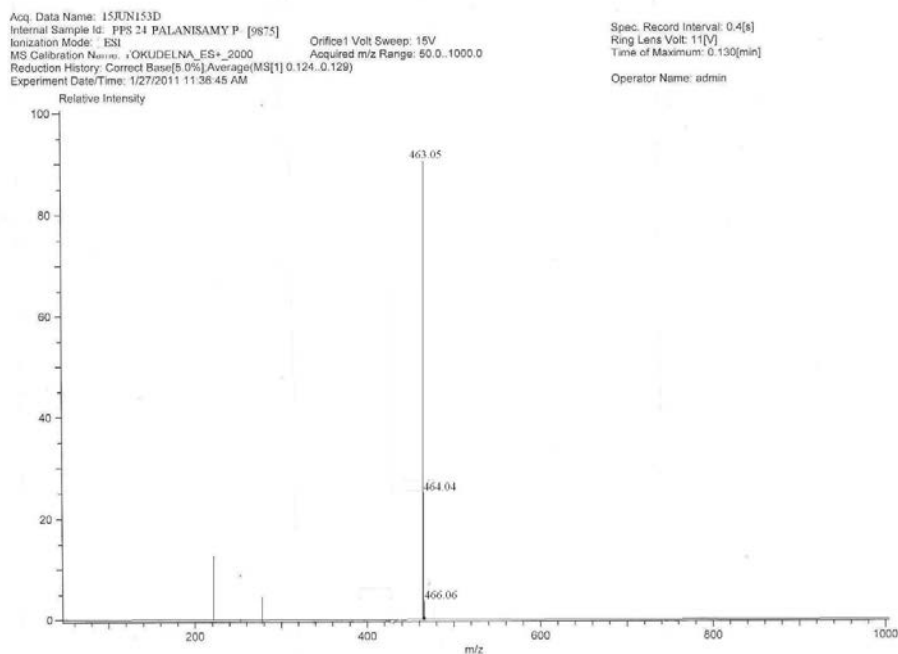

**Mass spectrum of N-(4-chlorophenyl)-1-phenyl-4,5-dihydro-1H-[1]benzothiepine[5,4-c]pyrazole-3-carboxamide 6,6-dioxide (12c)**



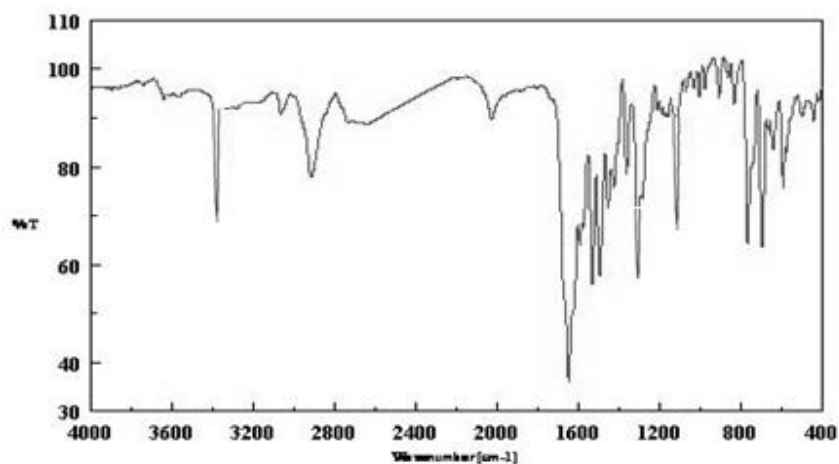

IR spectrum of N-(3-nitrophenyl)-1-phenyl-4,5-dihydro-1H-[1]benzothiepine[5,4-c]pyrazole-3-carboxamide 6,6-dioxide (12d)

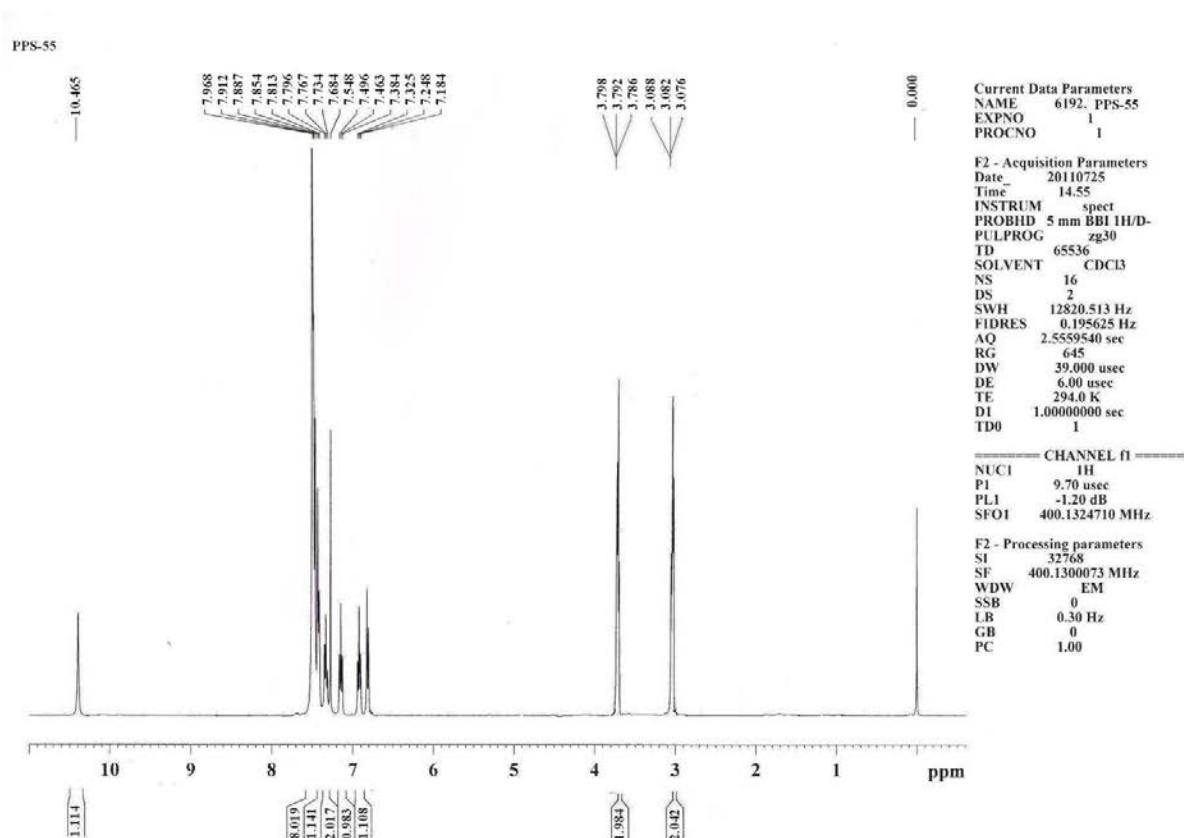

<sup>1</sup>H-NMR spectrum of N-(3-nitrophenyl)-1-phenyl-4,5-dihydro-1H-[1]benzothiepine[5,4-c]pyrazole-3-carboxamide 6,6-dioxide (12d)

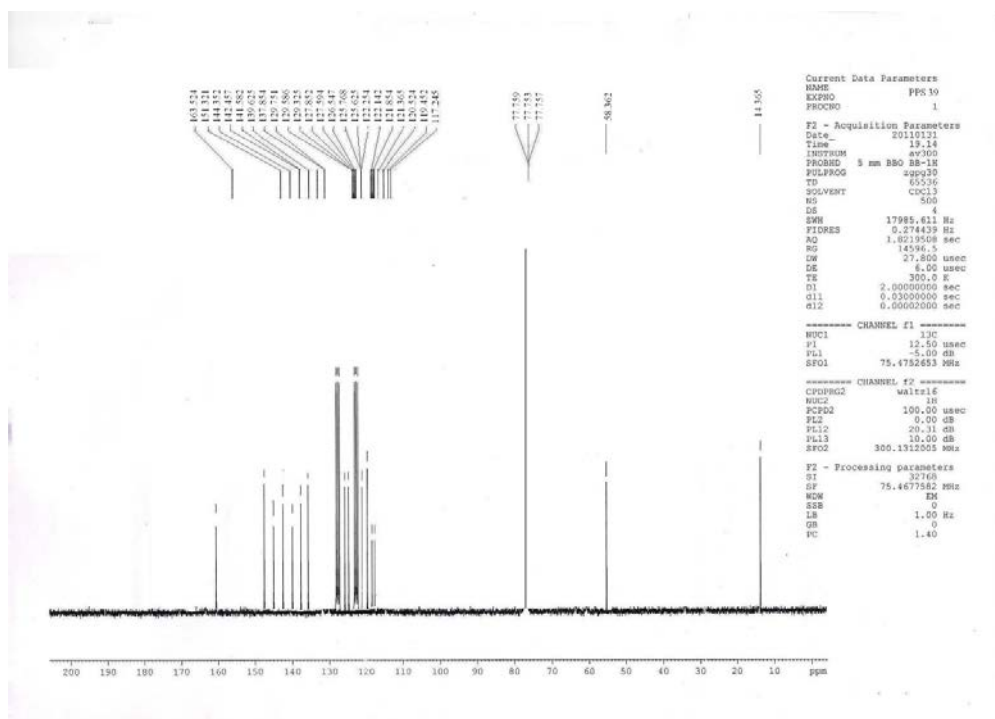

**<sup>13</sup>C-NMR spectrum of N-(3-nitrophenyl)-1-phenyl-4,5-dihydro-1H-[1]benzothiepiino[5,4-c]pyrazole-3-carboxamide 6,6-dioxide (12d)**

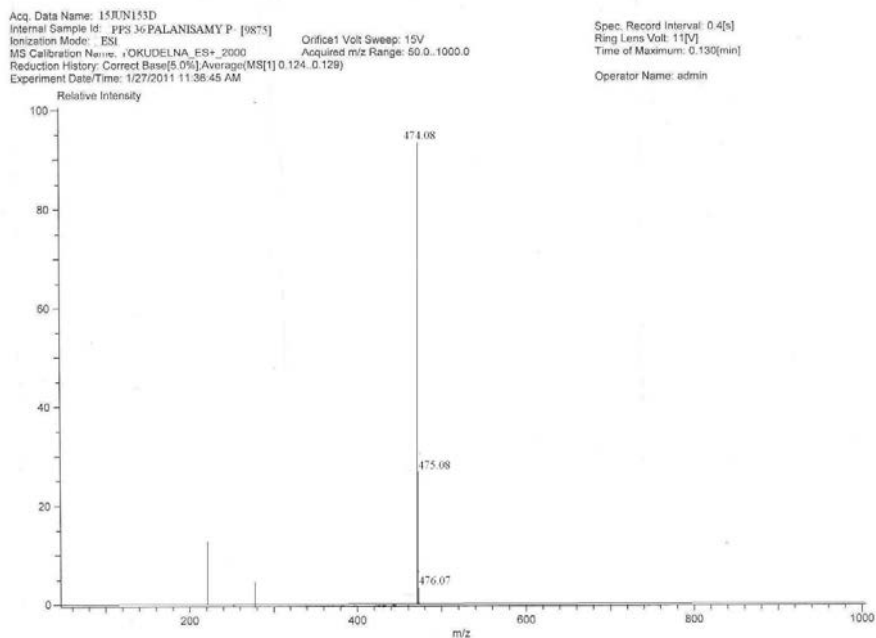

**Mass spectrum of N-(3-nitrophenyl)-1-phenyl-4,5-dihydro-1H-[1]benzothiepiino[5,4-c]pyrazole-3-carboxamide 6,6-dioxide (12d)**

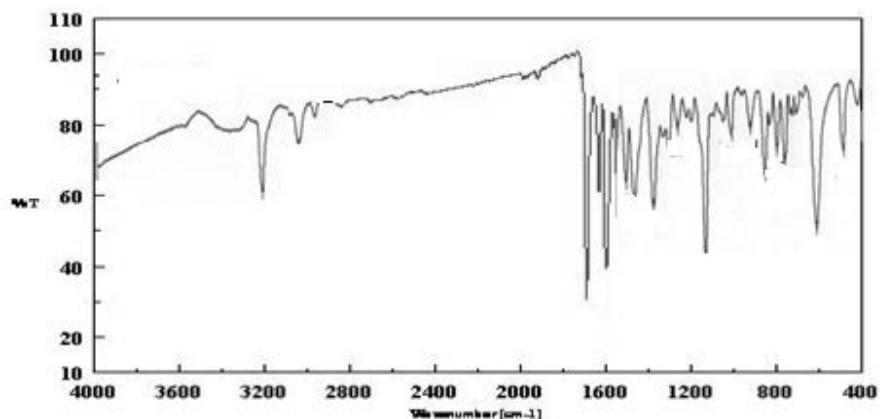

IR spectrum of N-(4-nitrophenyl)-1-phenyl-4,5-dihydro-1H-[1] benzothiepine[5,4-c]pyrazole-3-carboxamide 6,6-dioxide (12e)

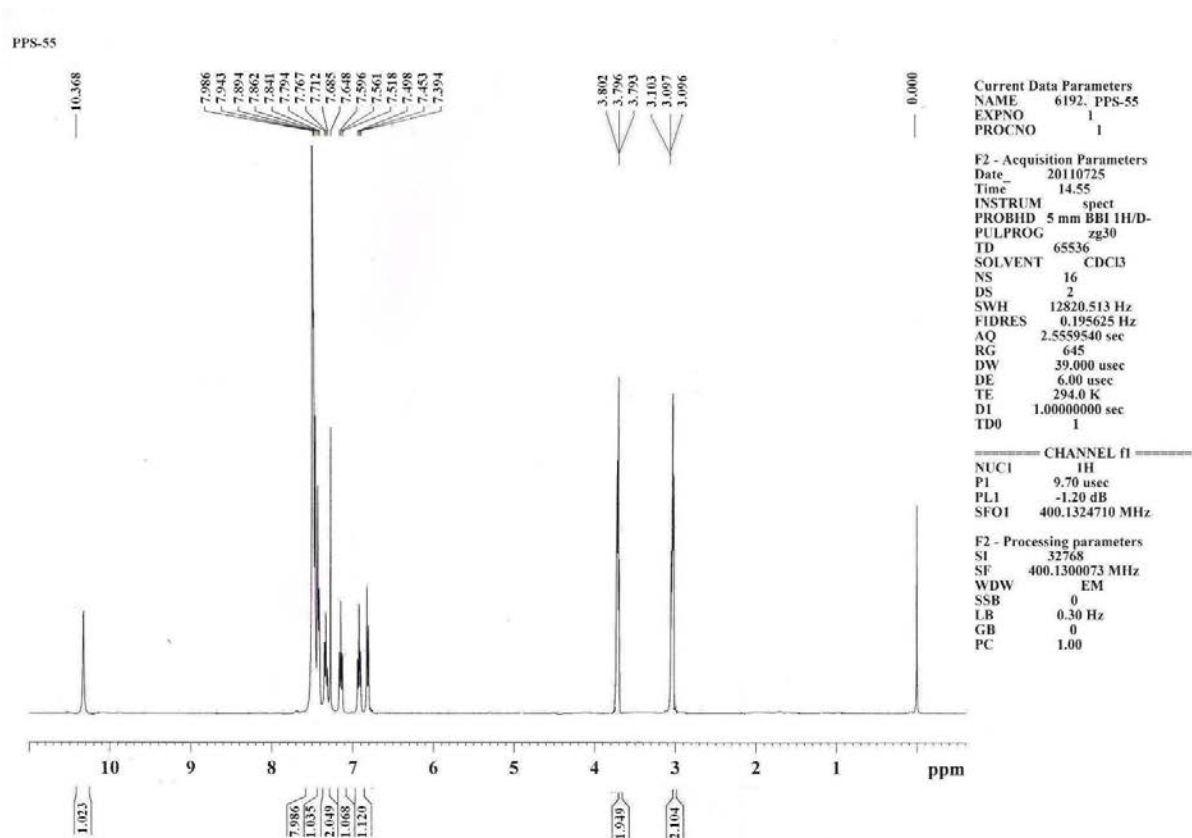

<sup>1</sup>H-NMR spectrum of N-(4-nitrophenyl)-1-phenyl-4,5-dihydro-1H-[1] benzothiepine[5,4-c]pyrazole-3-carboxamide 6,6-dioxide (12e)

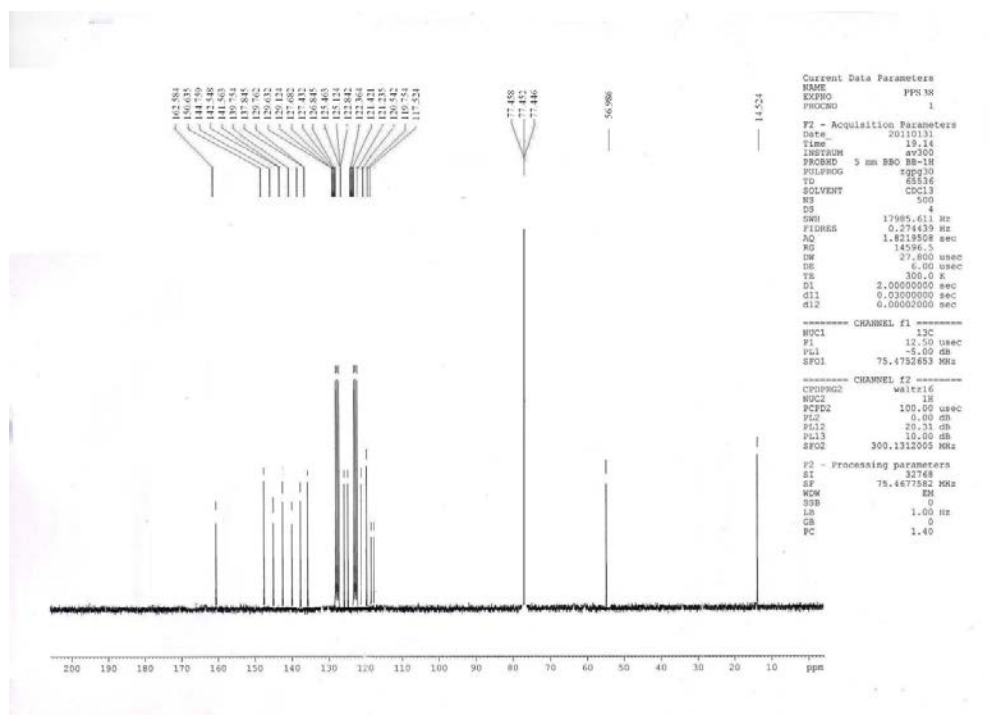

**<sup>13</sup>C-NMR spectrum of N-(4-nitrophenyl)-1-phenyl-4,5-dihydro-1H-[1] benzothiepine[5,4-c]pyrazole-3-carboxamide 6,6-dioxide (12e)**

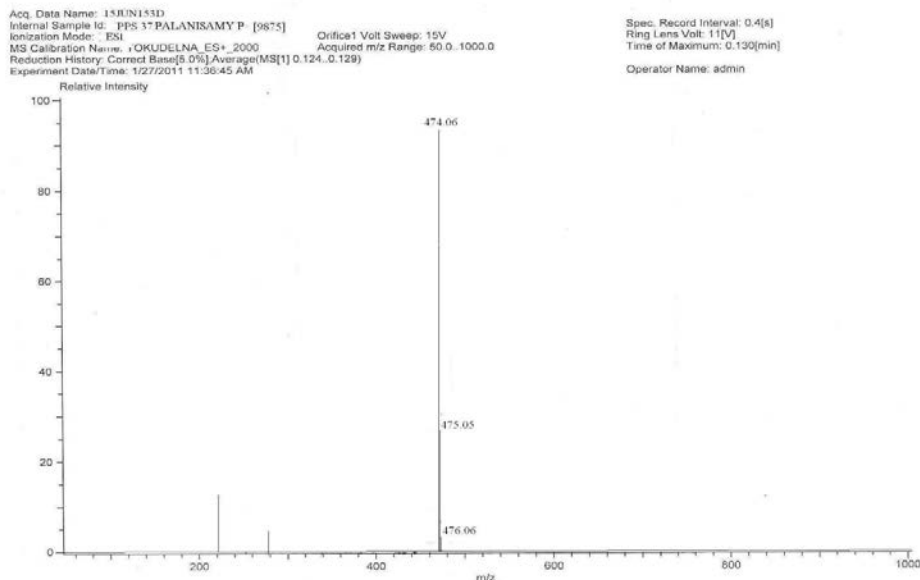

**Mass spectrum of N-(4-nitrophenyl)-1-phenyl-4,5-dihydro-1H-[1] benzothiepine[5,4-c]pyrazole-3-carboxamide 6,6-dioxide (12e)**

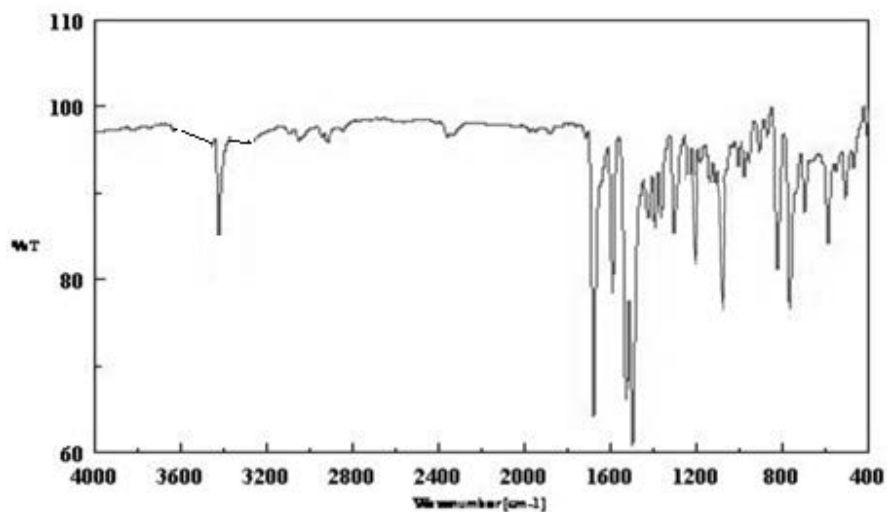

IR spectrum of 1-Phenyl-N-m-tolyl-4,5-dihydro-1H-[1]benzothiepine[5,4-c]pyrazole-3-carboxamide 6,6-dioxide (12f)

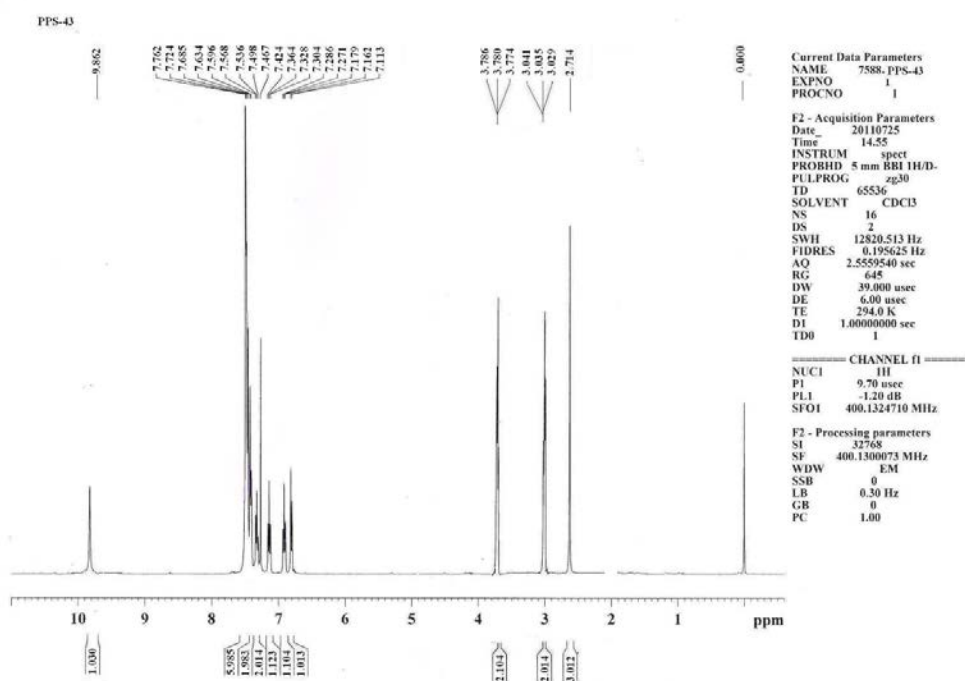

<sup>1</sup>H-NMR spectrum of 1-Phenyl-N-m-tolyl-4,5-dihydro-1H-[1]benzothiepine[5,4-c]pyrazole-3-carboxamide 6,6-dioxide (12f)

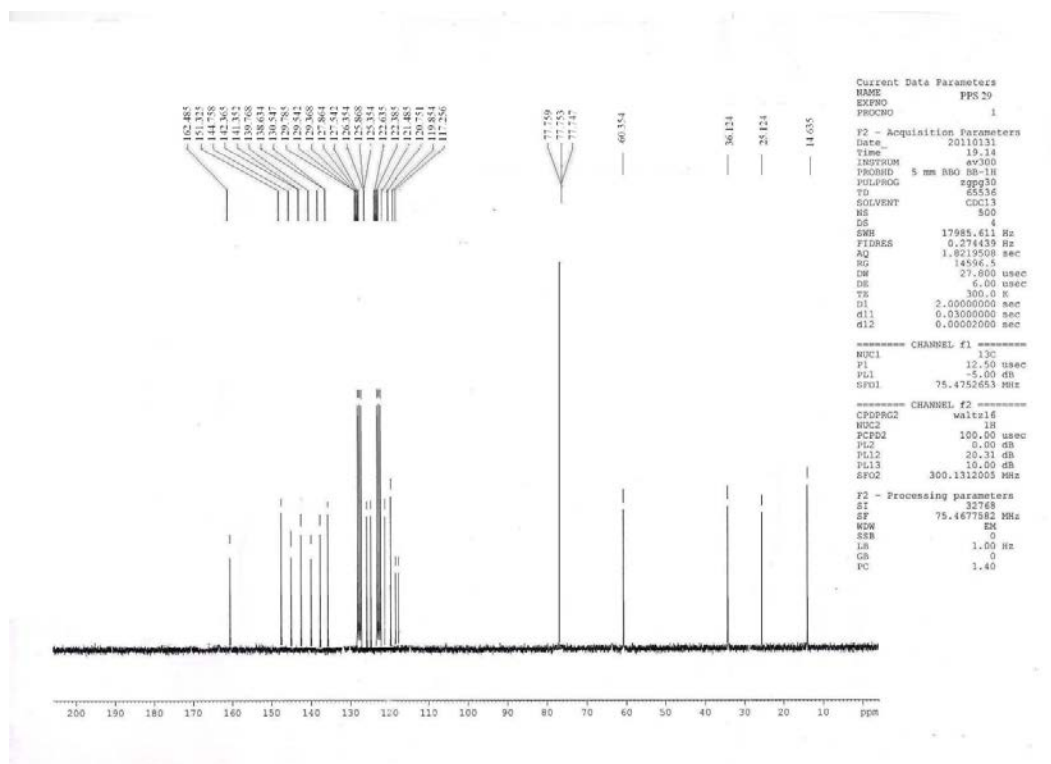

**<sup>13</sup>C-NMR spectrum of 1-Phenyl-N-m-tolyl-4,5-dihydro-1H-[1]benzothiepine[5,4-c]pyrazole-3-carboxamide 6,6-dioxide (12f)**

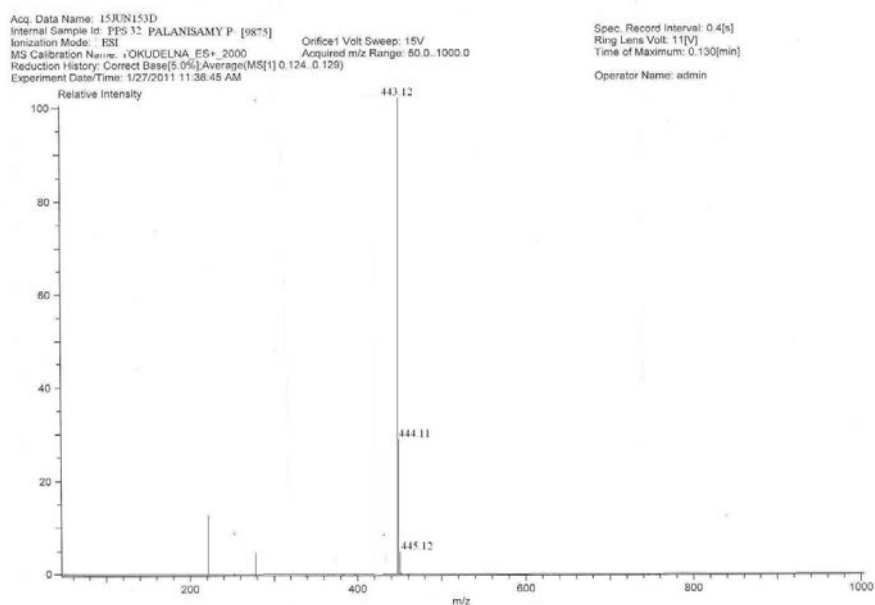

**Mass spectrum of 1-Phenyl-N-m-tolyl-4,5-dihydro-1H-[1]benzothiepine[5,4-c]pyrazole-3-carboxamide 6,6-dioxide (12f)**

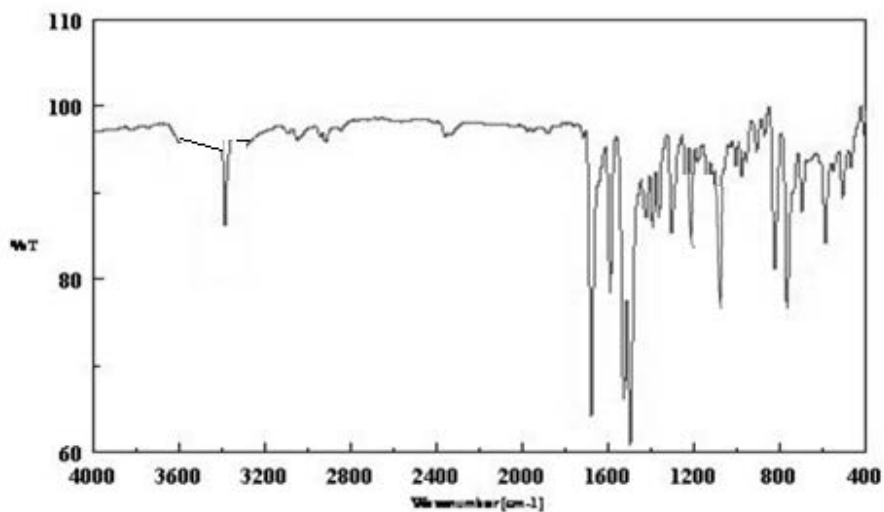

IR spectrum of 1-Phenyl-N-p-tolyl-14,5-dihydro-1H-[1]benzothiepine[5,4-c]pyrazole-3-carboxamide 6,6-dioxide (12g)

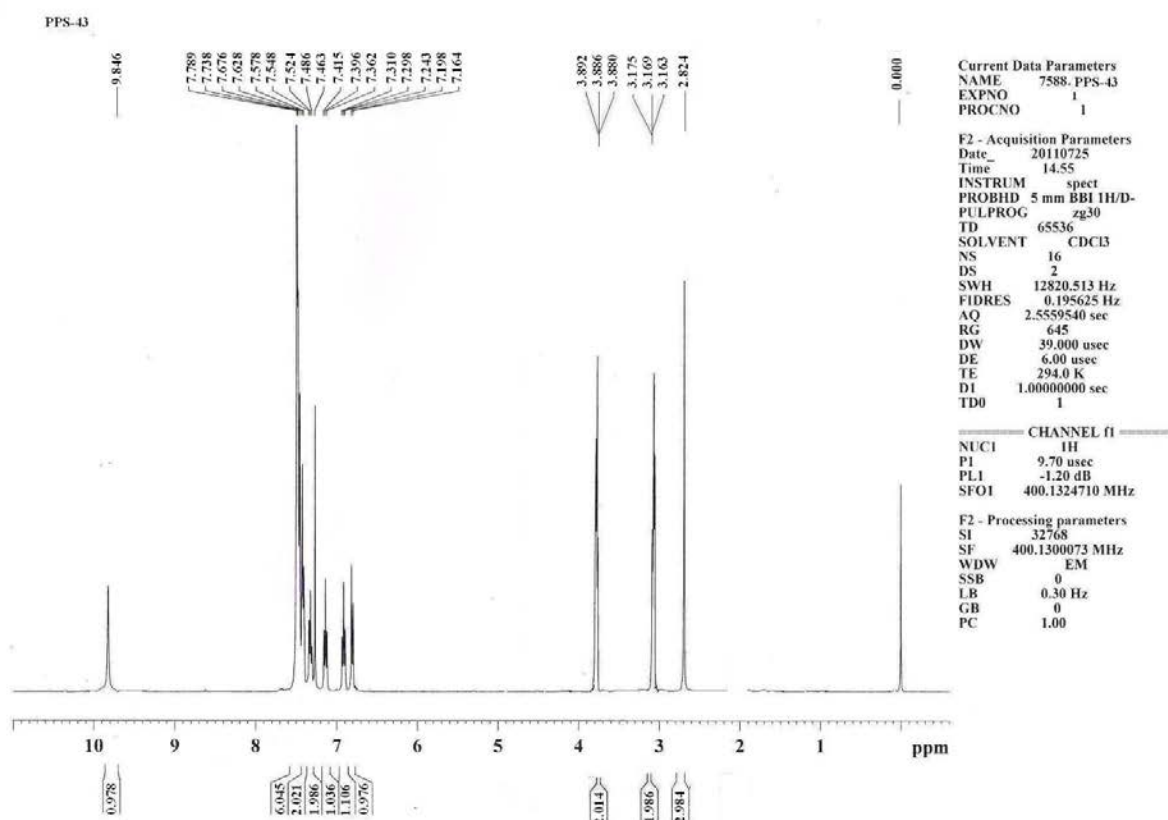

<sup>1</sup>H-NMR spectrum of 1-Phenyl-N-p-tolyl-14,5-dihydro-1H-[1]benzothiepine[5,4-c]pyrazole-3-carboxamide 6,6-dioxide (12g)

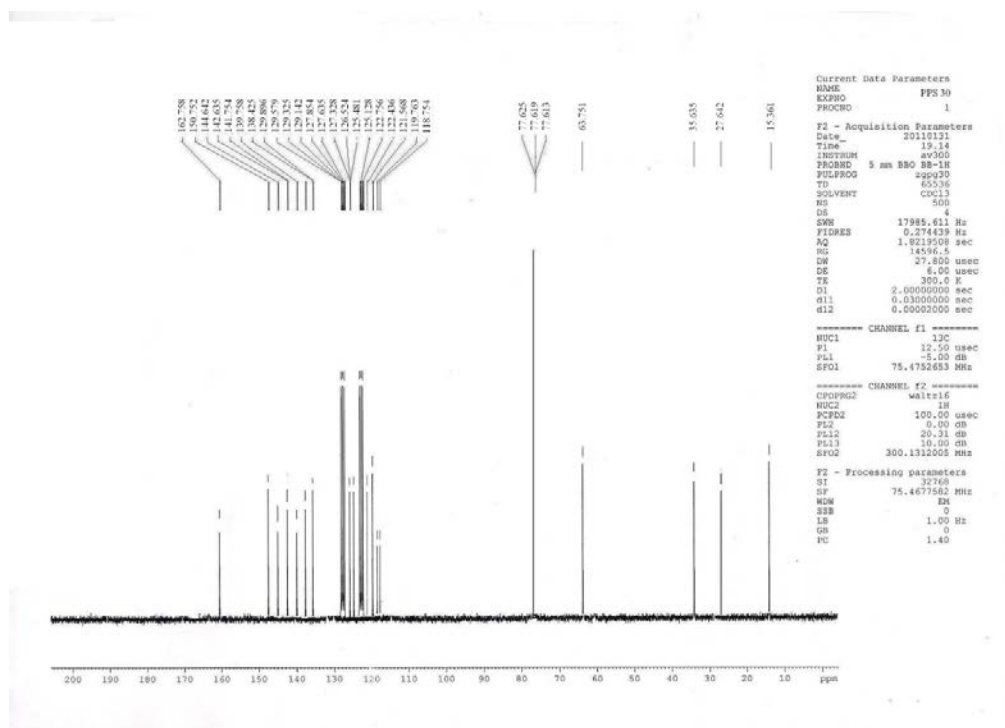

**<sup>13</sup>C-NMR spectrum of 1-Phenyl-N-p-tolyl-14,5-dihydro-1H-[1]benzothiepine[5,4-c]pyrazole-3-carboxamide 6,6-dioxide (12g)**

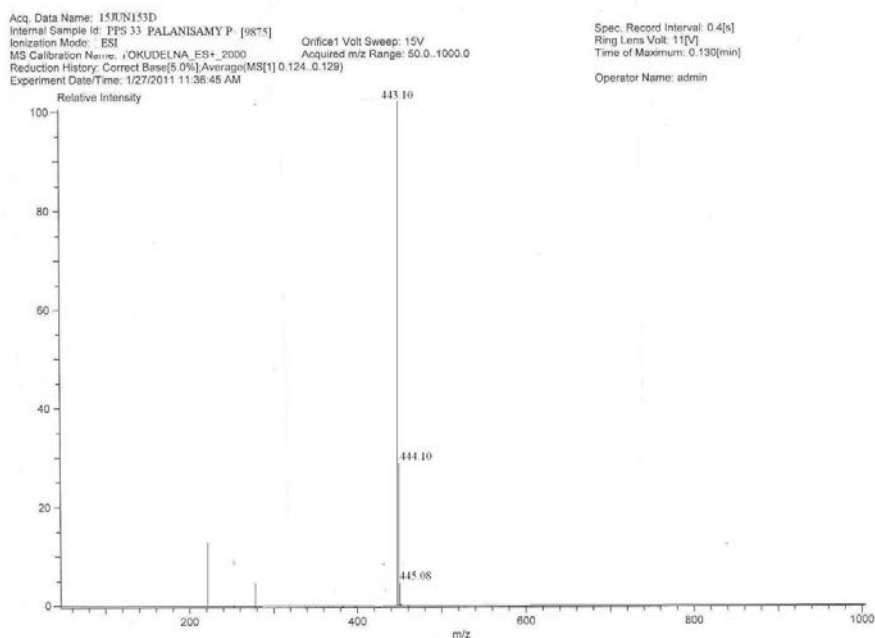

**Mass spectrum of 1-Phenyl-N-p-tolyl-14,5-dihydro-1H-[1]benzothiepine[5,4-c]pyrazole-3-carboxamide 6,6-dioxide (12g)**



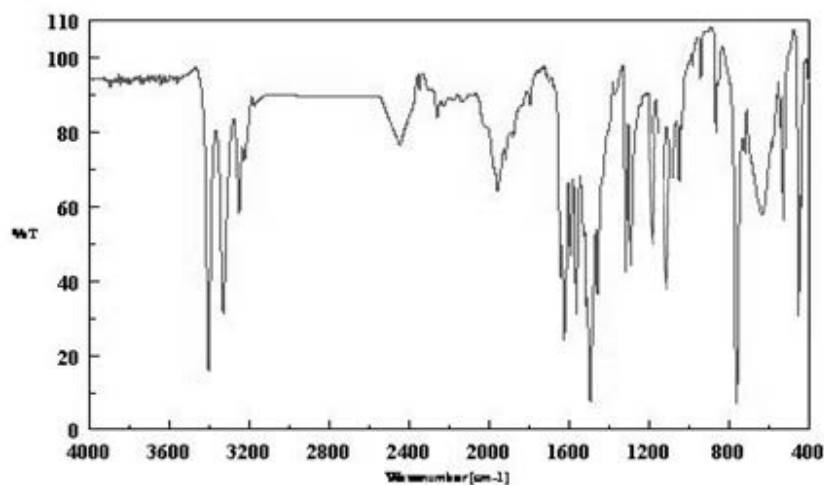

IR spectrum of N-(2-aminophenyl)-1-phenyl-4,5-dihydro-1H-[1]benzothiepine[5,4-c]pyrazole-3-carboxamide 6,6-dioxide (12h)

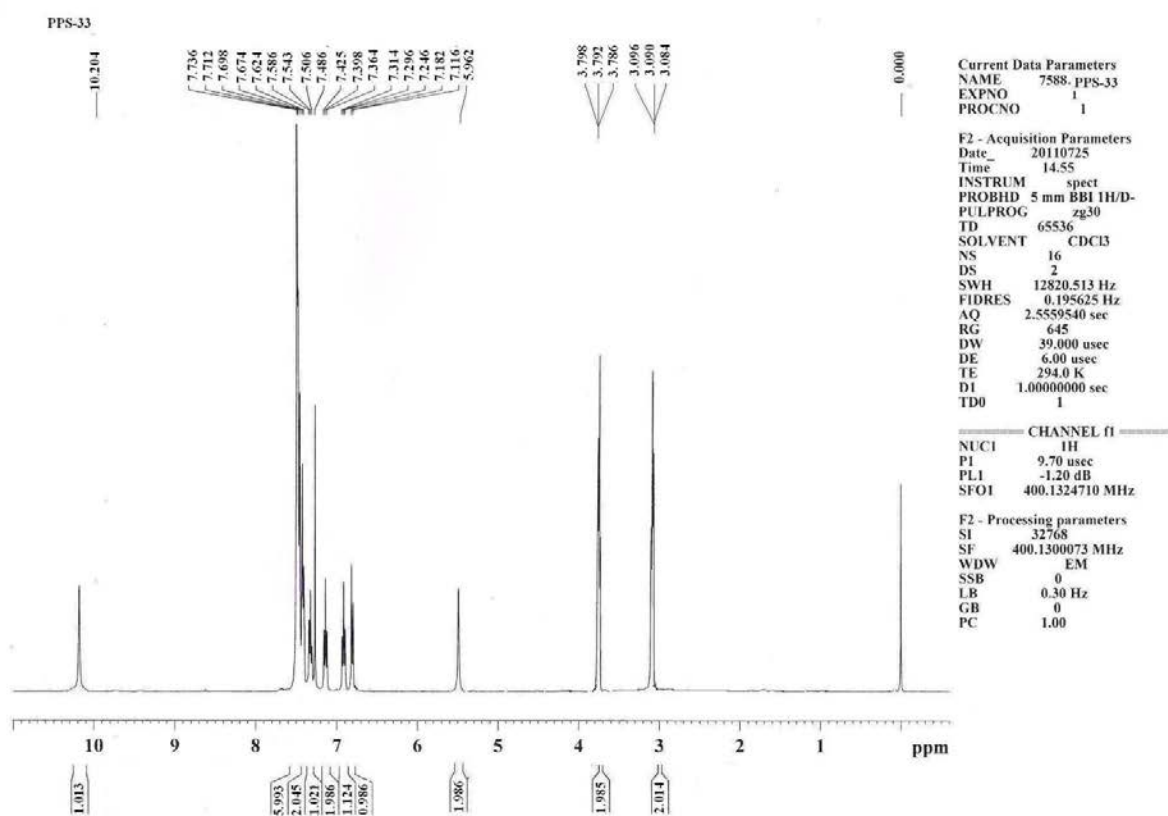

<sup>1</sup>H-NMR spectrum of N-(2-aminophenyl)-1-phenyl-4,5-dihydro-1H-[1]benzothiepine[5,4-c]pyrazole-3-carboxamide 6,6-dioxide (12h)

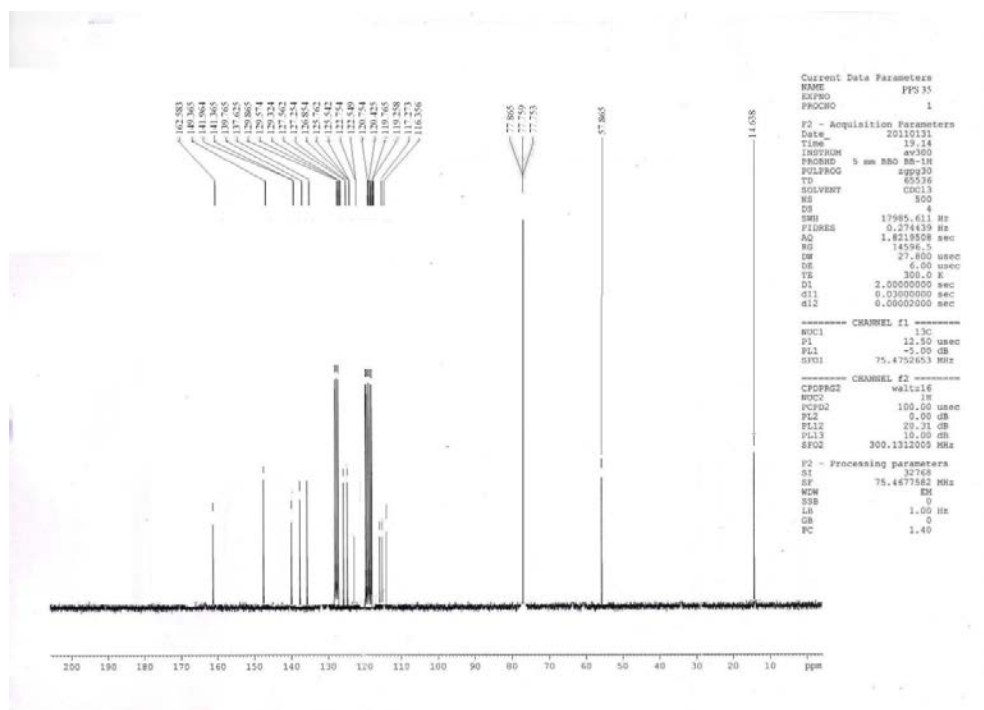

**<sup>13</sup>C-NMR spectrum of N-(2-aminophenyl)-1-phenyl-4,5-dihydro-1H-[1]benzothiepine[5,4-c]pyrazole-3-carboxamide 6,6-dioxide (12h)**

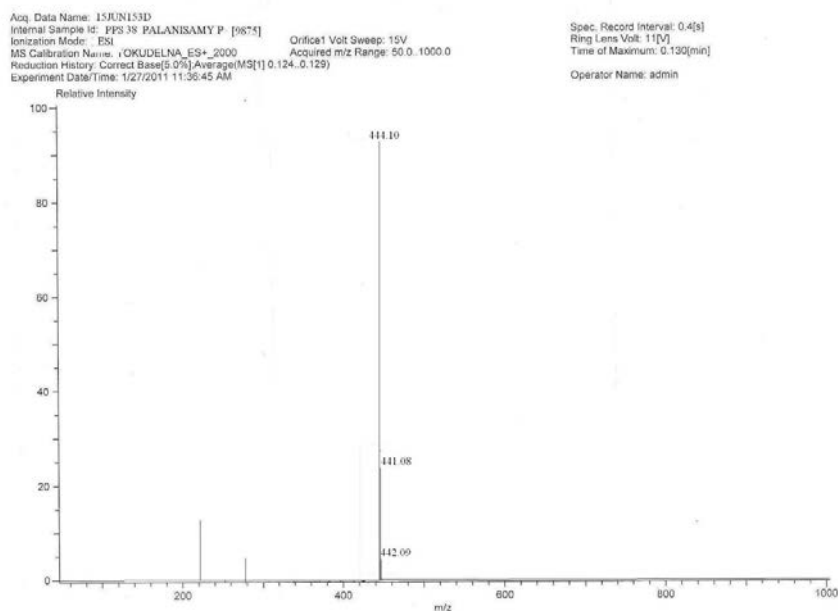

**Mass spectrum of N-(2-aminophenyl)-1-phenyl-4,5-dihydro-1H-[1]benzothiepine[5,4-c]pyrazole-3-carboxamide 6,6-dioxide (12h)**

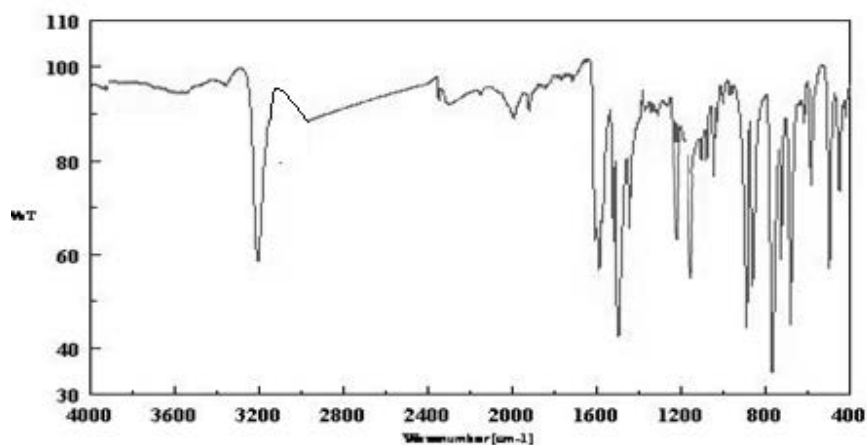

IR spectrum of 1-phenyl-4,5-dihydro-1H-[1]benzothiepine[5,4-c]pyrazole-3-carbohydrazide 6,6-dioxide (12i)

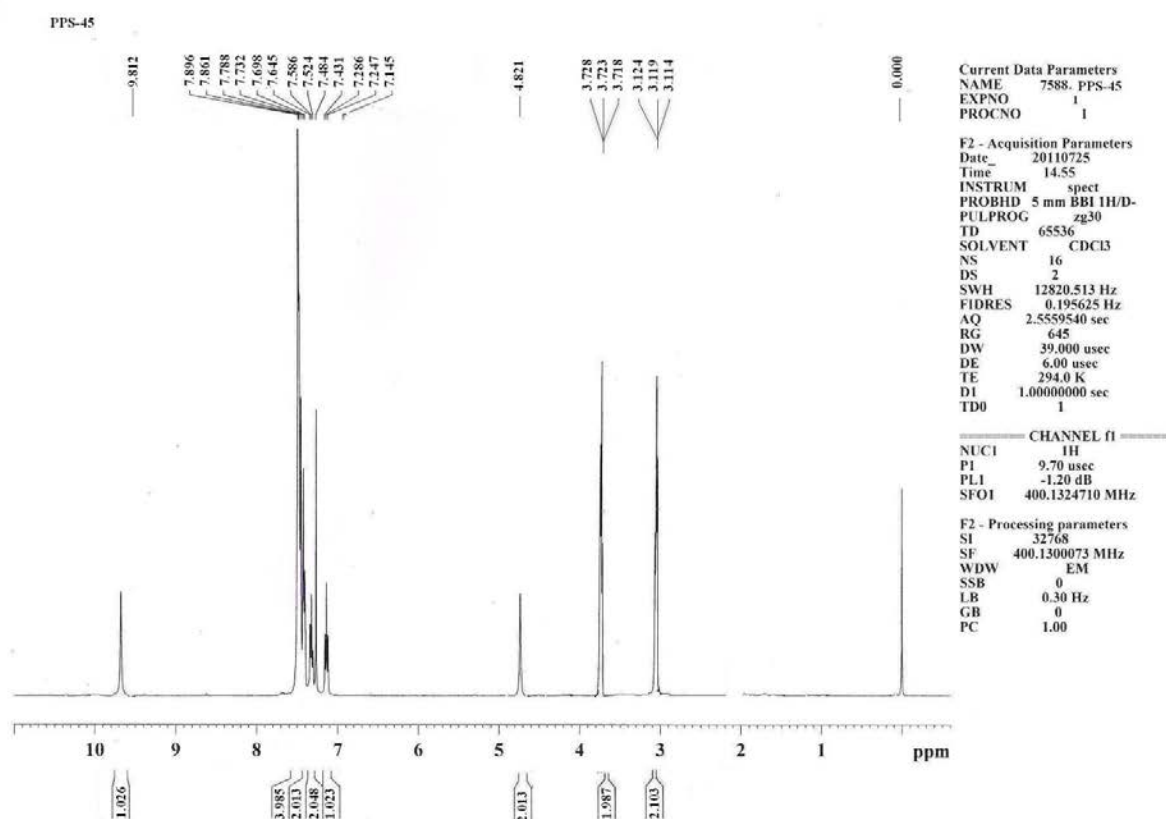

<sup>1</sup>H-NMR spectrum of 1-phenyl-4,5-dihydro-1H-[1]benzothiepine[5,4-c]pyrazole-3-carbohydrazide 6,6-dioxide (12i)

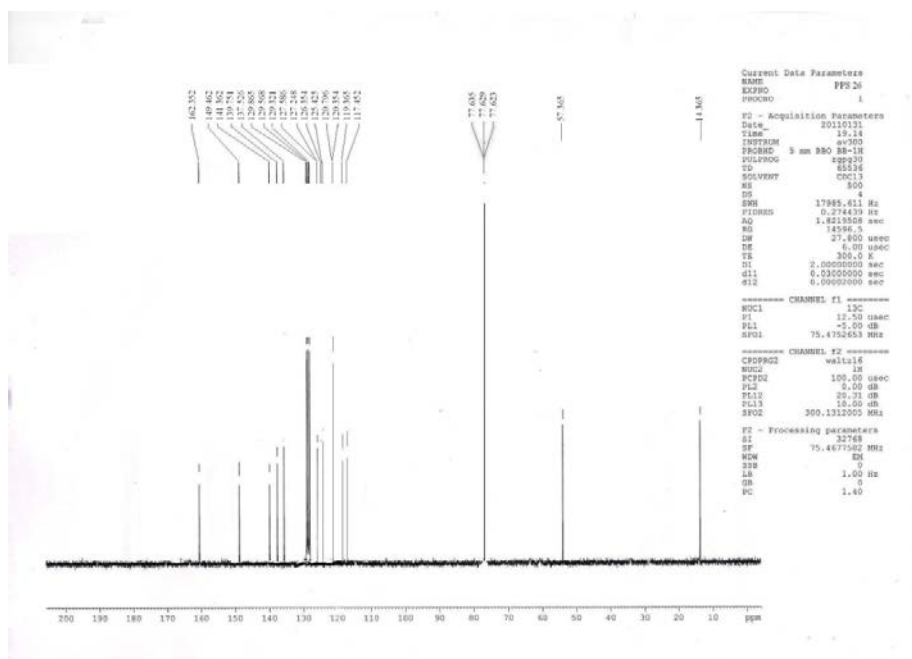

**$^{13}\text{C}$ -NMR spectrum of 1-phenyl-4,5-dihydro-1H-[1]benzothiepine[5,4-c]pyrazole-3-carbohydrazide 6,6-dioxide (12i)**

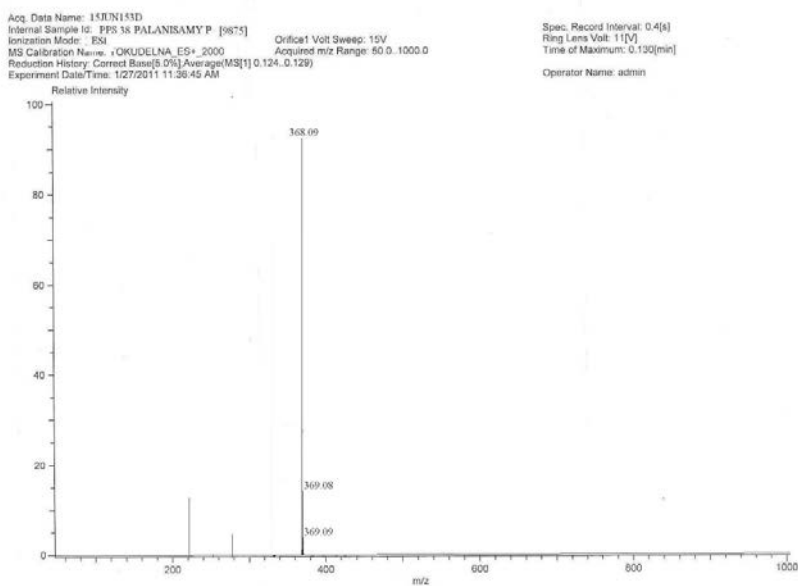

**Mass spectrum of 1-phenyl-4,5-dihydro-1H-[1]benzothiepine[5,4-c]pyrazole-3-carbohydrazide 6,6-dioxide (12i)**

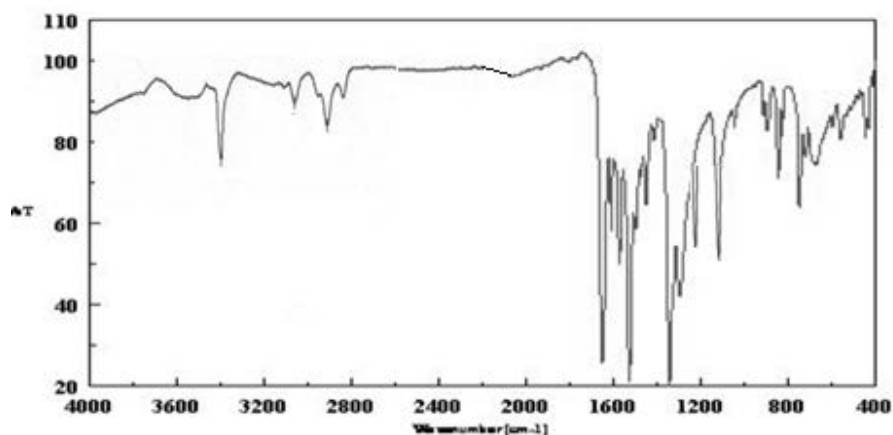

IR spectrum of N',1-diphenyl-4,5-dihydro-1H-[1]benzothiepine[5,4-c]pyrazole-3-carbohydrazide  
6,6-dioxide (12j)

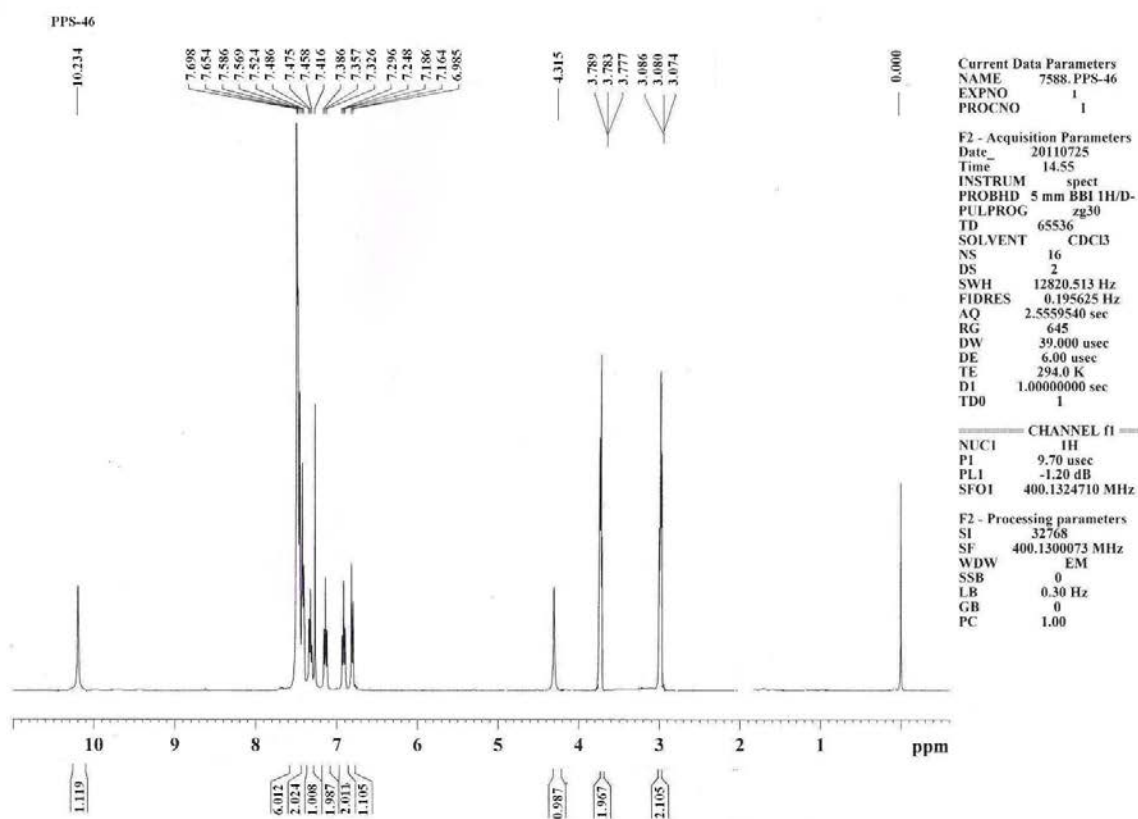

<sup>1</sup>H-NMR spectrum of N',1-diphenyl-4,5-dihydro-1H-[1]benzothiepine[5,4-c]pyrazole-3-  
carbohydrazide 6,6-dioxide (12j)

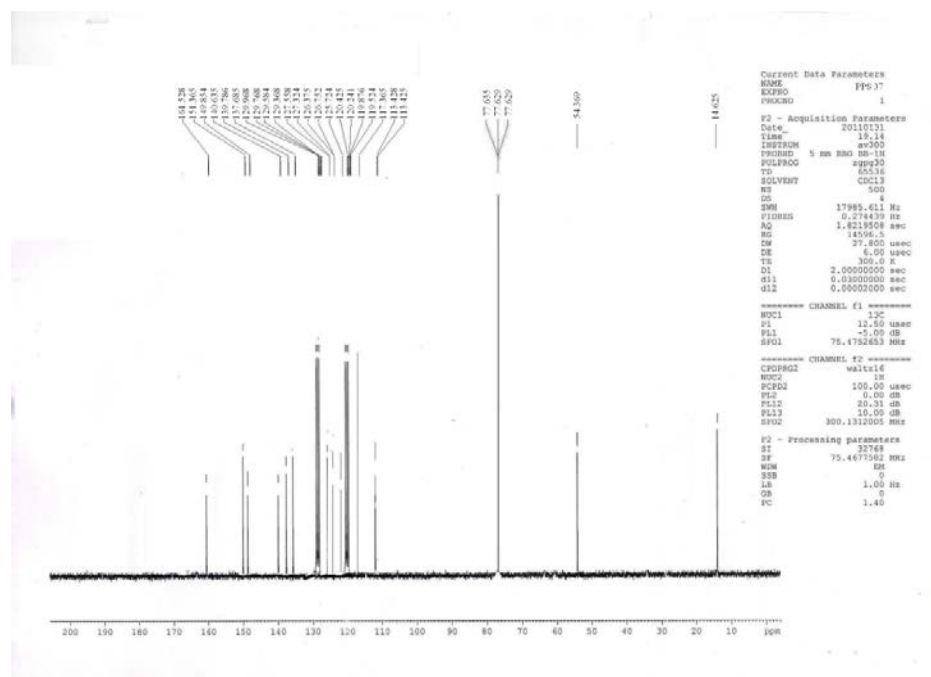

**<sup>13</sup>C-NMR spectrum of N',1-diphenyl-4,5-dihydro-1H-[1]benzothiepine[5,4-c]pyrazole-3-carbohydrazone 6,6-dioxide (12j)**

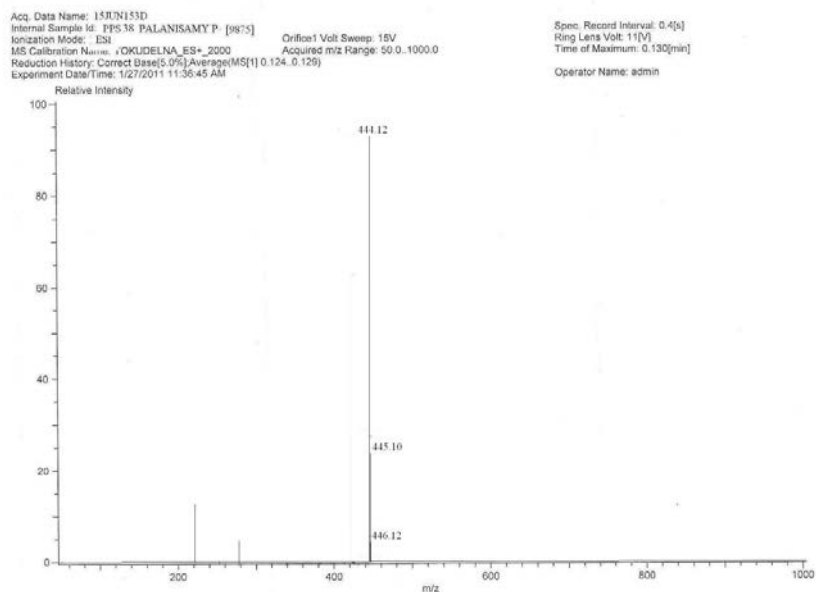

**Mass spectrum of N',1-diphenyl-4,5-dihydro-1H-[1]benzothiepine[5,4-c]pyrazole-3-carbohydrazone 6,6-dioxide (12j)**

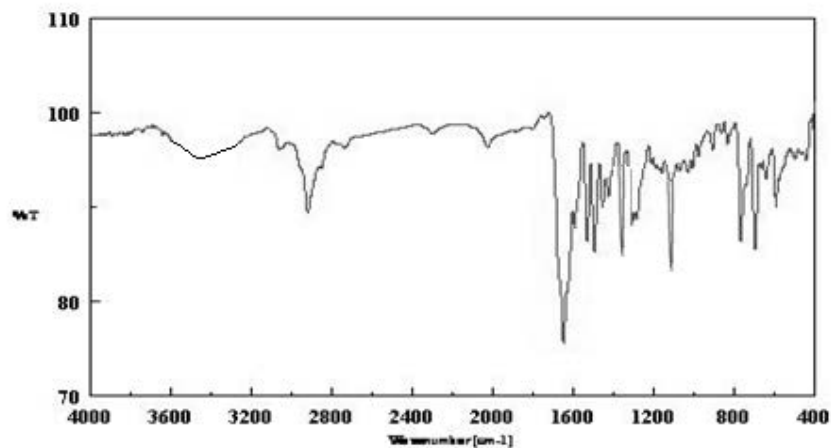

IR spectrum of N-(1, 5-Dimethyl-3-oxo-2-phenyl-2,3-dihydro-1H-pyrazol-4-yl)-1-phenyl-4,5-dihydro-1H-[1]benzothiepine[5,4-c]pyrazole-3-carboxamide 6,6-dioxide (12k)

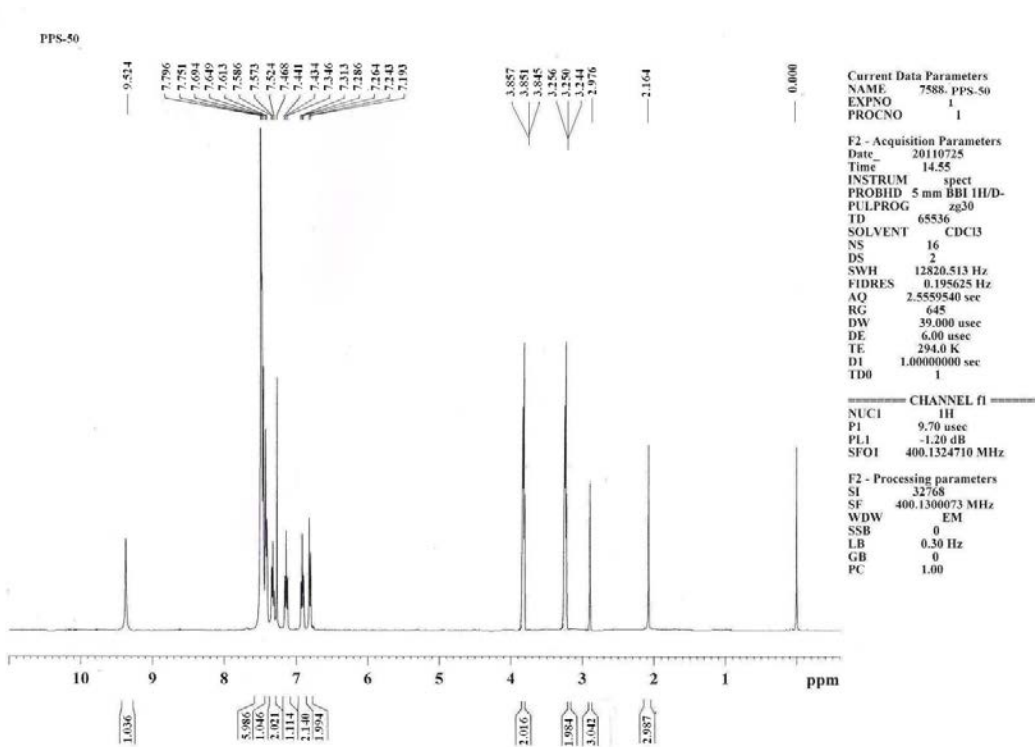

<sup>1</sup>H-NMR spectrum of N-(1, 5-Dimethyl-3-oxo-2-phenyl-2,3-dihydro-1H-pyrazol-4-yl)-1-phenyl-4,5-dihydro-1H-[1]benzothiepine[5,4-c]pyrazole-3-carboxamide 6,6-dioxide (12k)

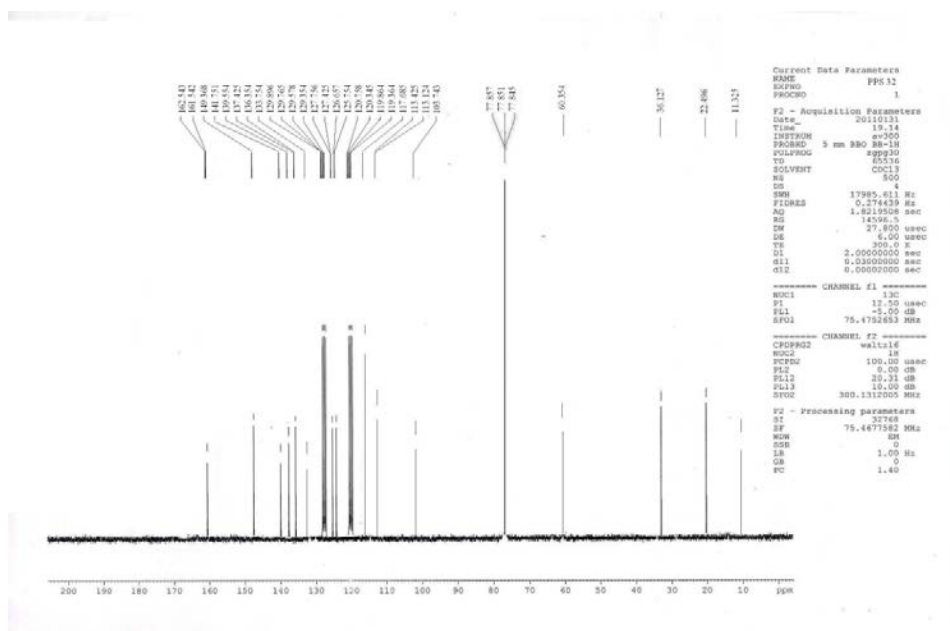

**<sup>13</sup>C-NMR spectrum of N-(1, 5-Dimethyl-3-oxo-2-phenyl-2,3-dihydro-1H-pyrazol-4-yl)-1-phenyl-4,5-dihydro-1H-[1]benzothiepiino[5,4-c]pyrazole-3-carboxamide 6,6-dioxide (12k)**

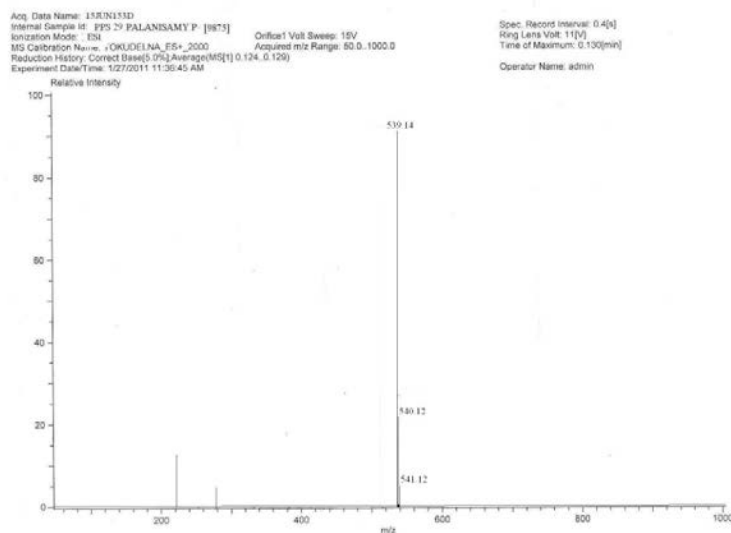

**Mass spectrum of N-(1, 5-Dimethyl-3-oxo-2-phenyl-2,3-dihydro-1H-pyrazol-4-yl)-1-phenyl-4,5-dihydro-1H-[1]benzothiepiino[5,4-c]pyrazole-3-carboxamide 6,6-dioxide (12k)**



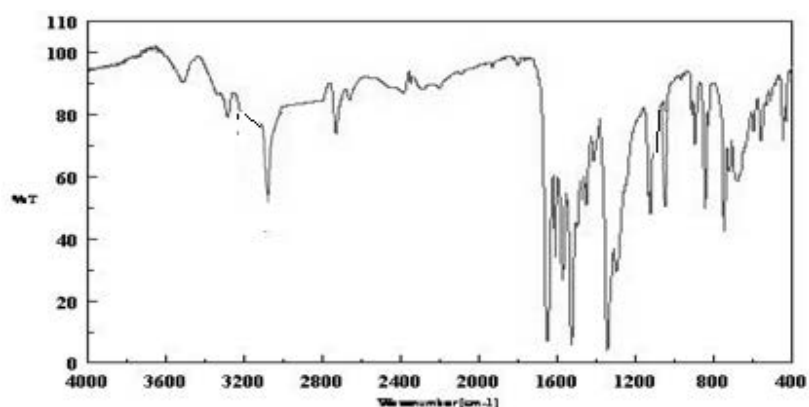

IR spectrum of N-(1,3-benzothiazol-2-yl)-1-phenyl-4,5-dihydro-1H-[1]benzothiepine[5,4-c]pyrazole-3-carboxamide 6,6-dioxide (12)

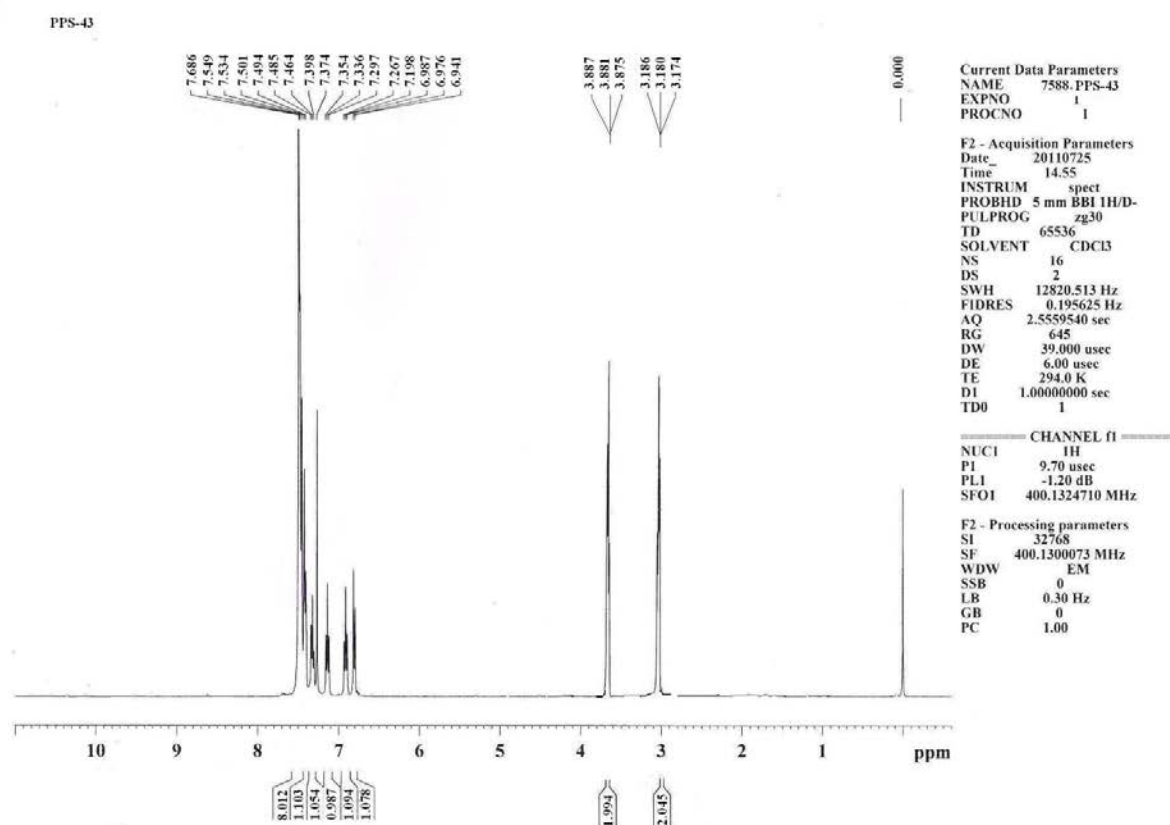

<sup>1</sup>H-NMR spectrum of N-(1,3-benzothiazol-2-yl)-1-phenyl-4,5-dihydro-1H-[1]benzothiepine[5,4-c]pyrazole-3-carboxamide 6,6-dioxide (12)

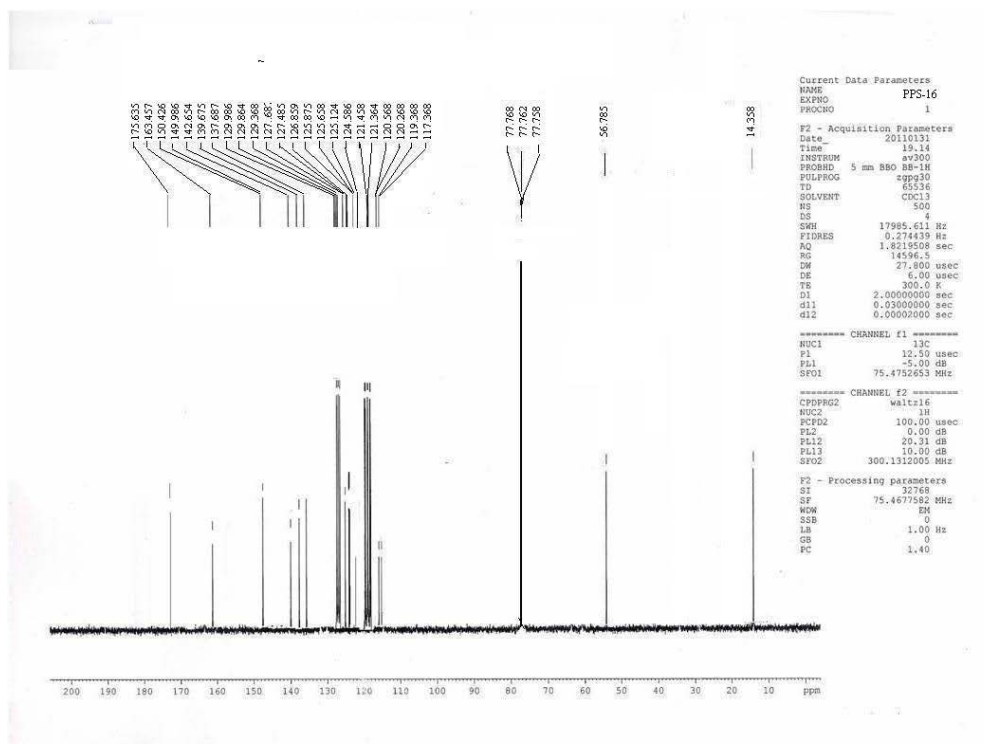

**<sup>13</sup>C-NMR spectrum of N-(1,3-benzothiazol-2-yl)-1-phenyl-4,5-dihydro-1H-[1]benzothiepine[5,4-c]pyrazole-3-carboxamide 6,6-dioxide (12)**

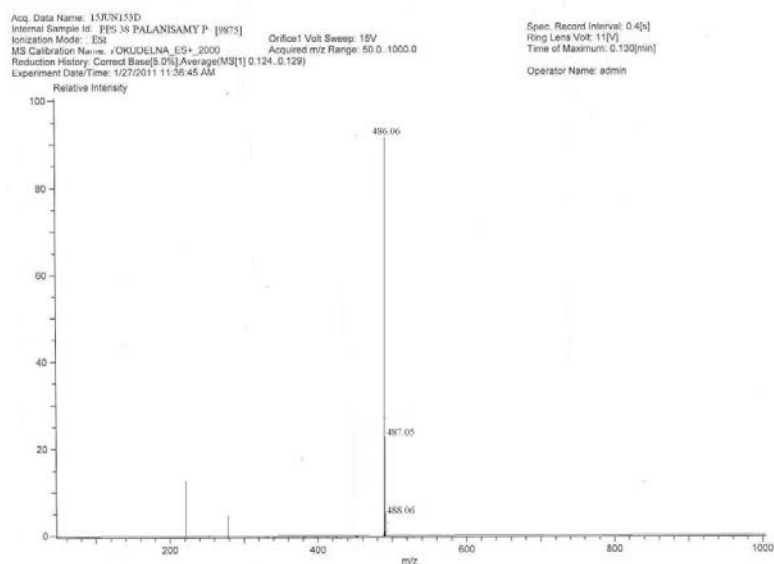

**Mass spectrum of N-(1,3-benzothiazol-2-yl)-1-phenyl-4,5-dihydro-1H-[1]benzothiepine[5,4-c]pyrazole-3-carboxamide 6,6-dioxide (12)**

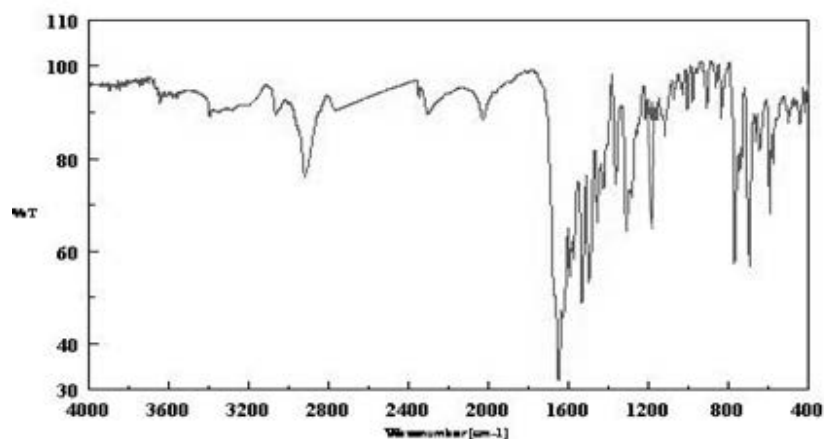

IR spectrum of N-(Naphthalen-1-yl)-1-phenyl-4,5-dihydro-1H-[1]benzothiepine[5,4-c]pyrazole-3-carboxamide 6,6-dioxide (12m)

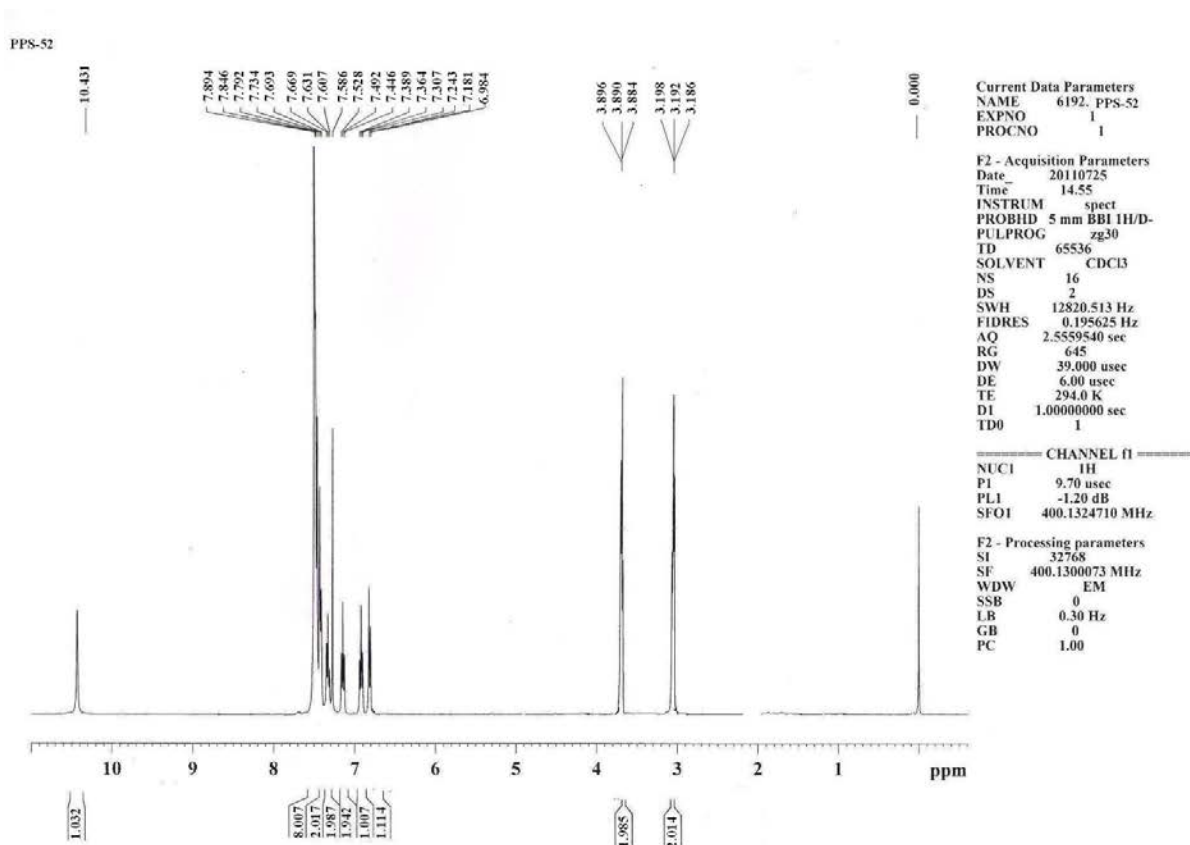

$^1\text{H-NMR}$  spectrum of N-(Naphthalen-1-yl)-1-phenyl-4,5-dihydro-1H-[1]benzothiepine[5,4-c]pyrazole-3-carboxamide 6,6-dioxide (12m)

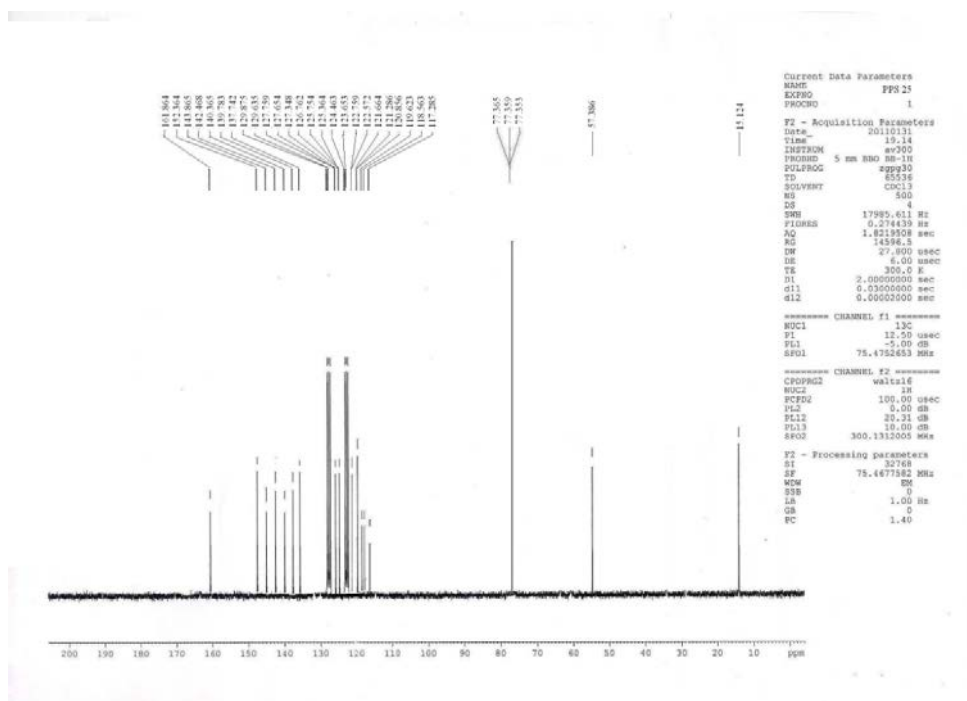

**<sup>13</sup>C-NMR N-(Naphthalen-1-yl)-1-phenyl-4,5-dihydro-1H-[1]benzothiepine[5,4-c]pyrazole-3-carboxamide 6,6-dioxide (12m)**

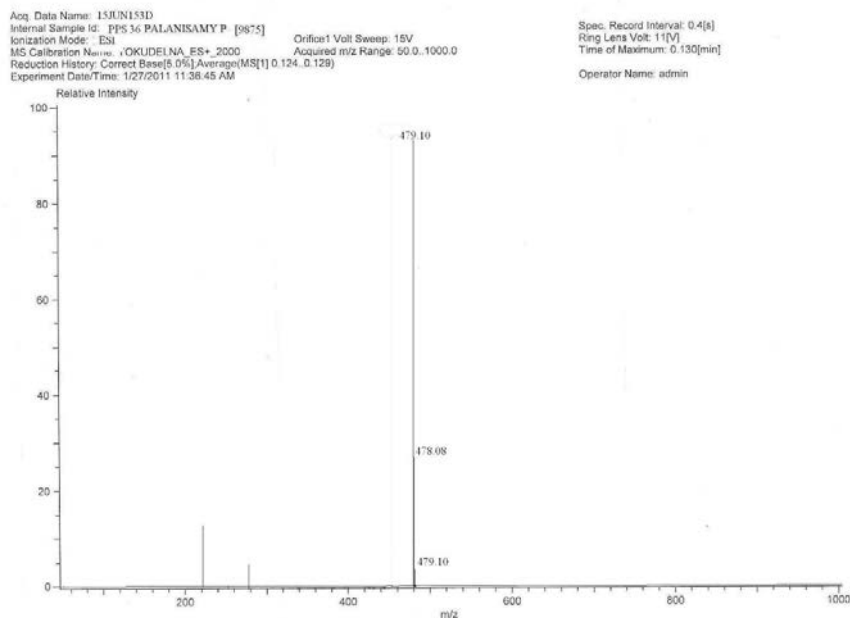

**Mass spectrum of N-(Naphthalen-1-yl)-1-phenyl-4,5-dihydro-1H-[1]benzothiepine[5,4-c]pyrazole-3-carboxamide 6,6-dioxide (12m)**
